1 **An ABA-GA bistable switch can account for natural variation in the variability**  
2 **of Arabidopsis seed germination time**

3

4 Katie Abley\*\*, Pau Formosa-Jordan\*\*, Hugo Tavares, Emily Chan, Ottoline Leyser\*, James C.W.

5 Locke\*

6 The Sainsbury Laboratory, University of Cambridge, Cambridge, Cambridgeshire, United Kingdom,

7 CB2 1LR.

8 \*Corresponding authors

9 \*\*These authors contributed equally

10 Email: James.Locke@slcu.cam.ac.uk (JCWL)

11 Email: ol235@cam.ac.uk (OL)

12 **Abstract**

13 Genetically identical plants growing in the same conditions can display heterogeneous phenotypes.  
14 Whether this phenotypic variability is functional and the mechanisms behind it are unclear. Here we  
15 use Arabidopsis seed germination time as a model system to examine phenotypic variability. We  
16 show extensive variation in seed germination time variability between Arabidopsis accessions, and  
17 use a multi-parent recombinant inbred population to identify two loci involved in this trait. Both loci  
18 include genes implicated in ABA signalling that could contribute to seed germination variability.  
19 Modelling reveals that the GA/ABA bistable switch underlying germination can amplify variability  
20 and account for the effects of these two loci on germination distributions. The model predicts the  
21 effects of modulating ABA and GA levels, which we validate genetically and by exogenous addition of  
22 hormones. We confirm that germination variability could act as a bet hedging strategy, by allowing a  
23 fraction of seeds to survive lethal stress.

24

25

26

## 1 Introduction

2 In an environment where current cues cannot be used to predict future conditions, a bet-hedging  
3 strategy can be advantageous, whereby the same genotype produces a variety of phenotypes in  
4 individuals in a common environment (Cohen, 1966; Lewontin and Cohen, 1969; Simons, 2011).  
5 Bacteria can use bet-hedging strategies to survive antibiotic treatments (Balaban et al., 2004;  
6 Martins and Locke, 2015). Mechanistic studies suggest that the required phenotypic variability is  
7 generated by genetic networks amplifying stochasticity in molecular interactions to generate a range  
8 of outputs (Alon, 2007; Eldar and Elowitz, 2010; Viney and Reece, 2013).

9 In plants, theoretical work shows that variability in seed germination time is likely to be  
10 advantageous in environments that are unpredictable (Cohen, 1966; Simons, 2011). Indeed,  
11 ecological studies have found that variability in seed germination time is correlated with  
12 environmental unpredictability (Simons and Johnston, 2006; Venable, 2007). This variability can  
13 involve germination of genetically identical seeds being spread between seasons or within a season  
14 (or a combination of both), and all these behaviours exist in wild species.

15 The mechanisms underlying how seed germination is spread between seasons have been studied in  
16 detail. Seeds can enter a 'dormant' state, refractory to germination even under favourable  
17 germination conditions (Baskin and Baskin, 2004; Bewley, 1997). Seed dormancy is a continuous  
18 variable, with genetically identical seeds having different depths of dormancy (Finch-Savage and  
19 Leubner-Metzger, 2006). However, the extent of dormancy for a batch of seeds is usually estimated  
20 by quantifying the percentage germination, which does not provide information about the  
21 distribution of germination times of individual seeds that germinate within a season, or experiment.

22 Although variability in germination times within a season has been studied in desert annuals (Simons  
23 and Johnston, 2006), these species are not amenable to genetic or mechanistic studies. Little is  
24 known about variability in germination time within a season in the model plant *Arabidopsis thaliana*.

1 The extent of variability, the mechanisms that underlie it, or how related the underlying mechanisms  
2 are to those that control seed dormancy between seasons, are unknown. However, there is a large  
3 body of work using percent germination as a measure of seed dormancy. A number of quantitative  
4 genetic studies have identified loci that underlie natural variation in the extent of dormancy under  
5 different environmental conditions, with the *DELAY OF GERMINATION (DOG)* loci being the first  
6 identified and some of the most characterised (Alonso-Blanco et al., 2003; Bentsink et al., 2010;  
7 Clerkx et al., 2004; Footitt et al., 2019; Kerdaffrec and Nordborg, 2017; Meng et al., 2008; van Der  
8 Schaar et al., 1997). The molecular mechanisms underlying germination have also been uncovered.  
9 In-depth molecular studies have shown that the decision to germinate is controlled by the balance  
10 between two hormones, gibberellic acid (GA), which promotes germination, and abscisic acid (ABA),  
11 which represses it (Liu and Hou, 2018). These hormones function in a mutually antagonistic manner  
12 by each inhibiting the synthesis and promoting the degradation of the other (Liu and Hou, 2018;  
13 Piskurewicz et al., 2008). Additionally, the two hormones have opposing effects on downstream  
14 transcriptional regulators that control the balance between dormancy and germination (Liu et al.,  
15 2016; Piskurewicz et al., 2008; Shu et al., 2013). Pioneering modelling work has suggested that  
16 variable germination times can be generated by variation in sensitivities to germination regulators in  
17 a batch of seeds (Bradford, 1990; Bradford and Trewavas, 1994), or due to stochastic fluctuations in  
18 the regulators (Johnston and Bassel, 2018). However, it remains unclear how different genotypes  
19 generate different extents of variability in germination times. Additionally, the extent to which there  
20 is natural variation in germination time distributions in *Arabidopsis* has not been described.

21 Here we set out to investigate germination time variability in *Arabidopsis*. We demonstrate that  
22 there is robust natural variation in germination time variability, and that this is genetically separable  
23 from mode germination time (i.e. the timing of the peak of the distribution), allowing these  
24 properties to be tuned independently. We show that two loci underlie variability in germination  
25 time. One of these loci overlaps with the *DOG6* locus and its effect on variability in germination time  
26 is correlated with effects on the mode, while the other overlaps with the *DOG1* locus and affects

1 variability independently from the mode. We show that variability in germination time appears to be  
2 an inherent property of each seed, rather than being generated by seed position on the parent  
3 plant. Based on these findings, we generate a mathematical model of the GA/ABA bistable switch  
4 that underlies germination. We show that the switch can amplify variability and account for the  
5 differing effects of the two identified loci on different germination traits. We validate the model by  
6 testing predictions about the effects of perturbations to ABA and GA levels. Finally, we show that  
7 increased variability in germination time can act as a bet hedging strategy against short durations of  
8 lethal stresses, suggesting circumstances under which selection for variability could confer a  
9 selective advantage.

## 10 **Results**

### 11 **Variability in seed germination time varies genetically in Arabidopsis**

12 We first determined whether Arabidopsis exhibits natural variation in the variability of seed  
13 germination time. To do this, we quantified germination time distributions for 19 natural accessions  
14 and a multi-parent recombinant inbred line population (MAGIC population), derived from those  
15 accessions (Kover et al., 2009). We also included 10 lines that we selected from a set of Spanish  
16 accessions as being likely to have low or high variability in germination time based on their  
17 germination time distributions over the first 6 days after sowing (Vidigal et al., 2016). We grew  
18 plants in controlled conditions for seed harvesting, and collected all the seeds from 3 plants of each  
19 line. After a fixed period of dry storage (~30 days), we sowed a sample of each of these replicate  
20 batches of seeds in petri-dishes in controlled conditions and scored germination every day until  
21 there had been no further germination for a period of 2 weeks (see methods for further details). We  
22 chose a relatively short period of dry storage for our experiments as we reasoned that this would  
23 best reflect the state of naturally shed seeds. In these conditions, the MAGIC lines had low levels of  
24 seed dormancy (with 30 days of dry storage, 82% of lines had  $\geq$  50% germination), allowing us to  
25 quantify germination time distributions and estimate its variability. We used the coefficient of

1 variation (CV =standard deviation / mean) of the germination time distribution as a measure of  
2 variability. We confirmed that CVs for the MAGIC parental lines remained similar over a range of  
3 lengths of dry storage period (30-60 days of dry storage), demonstrating that our results are not  
4 specific to one condition (Figure 1-figure supplement 1A, B).

5 The accessions showed a range of variabilities (Figure 1A). Some low CV accessions consistently  
6 germinated within 4 days, whilst higher CV lines germinated over a period of 19 days (Figure 1A).

7 The MAGIC lines exhibited transgressive segregation, with much greater variation in CV than the  
8 parental accessions (Figure 1A, compare orange and blue distributions, Figure 1B). The range of CVs  
9 observed in the Spanish accessions was within the range observed across all MAGIC lines (Figure 1B).

10 A small number of MAGIC lines (8 out of 341 characterised) had very high CVs of germination time  
11 (>0.6) compared to the rest (Figure 1B), which was due to a fraction of seeds germinating very late,  
12 giving rise to bimodal distributions (e.g. M178 and M182 in Figure 1A).

13 The CV of most MAGIC lines tested was similar between repeat experiments involving independent  
14 seed harvests and sowing (Figure 1C) (Pearson's  $r = 0.88$ , 95% CI [0.76, 0.94] for all lines for which  
15 repeats were done). In some of the very high variability lines, the presence of very late germinating  
16 seeds was reproducible between experiments (e.g. Figure 1C and Figure 1-figure supplement 1,  
17 M182 and M178). In other lines, very late germinating seeds were not detected in all experiments,  
18 and thus the CV was higher in some experiments than others (e.g. Figure 1C and Figure 1-figure  
19 supplement 1, M101 and M174). Thus, although the variability in seed germination time is  
20 reproducible for most lines, for some it is possible that their CVs may have been underestimated due  
21 to a failure to detect very late germinating seeds. To check whether the level of variability in seed  
22 germination time that we obtained for a given line was related to the specific sowing conditions, we  
23 sowed selected high and low variability lines on soil and found that although the exact distributions  
24 differed slightly between petri-dishes and soil, those lines with higher variability on petri-dishes also  
25 had higher variability on soil (Figure 1-figure supplement 1G). Overall our results reveal variation in

- 1 germination time variability in Arabidopsis, with CVs ranging from 0.09 to 1.7 across the MAGIC
- 2 lines, giving a good basis for testing the genetic mechanisms underlying this trait.

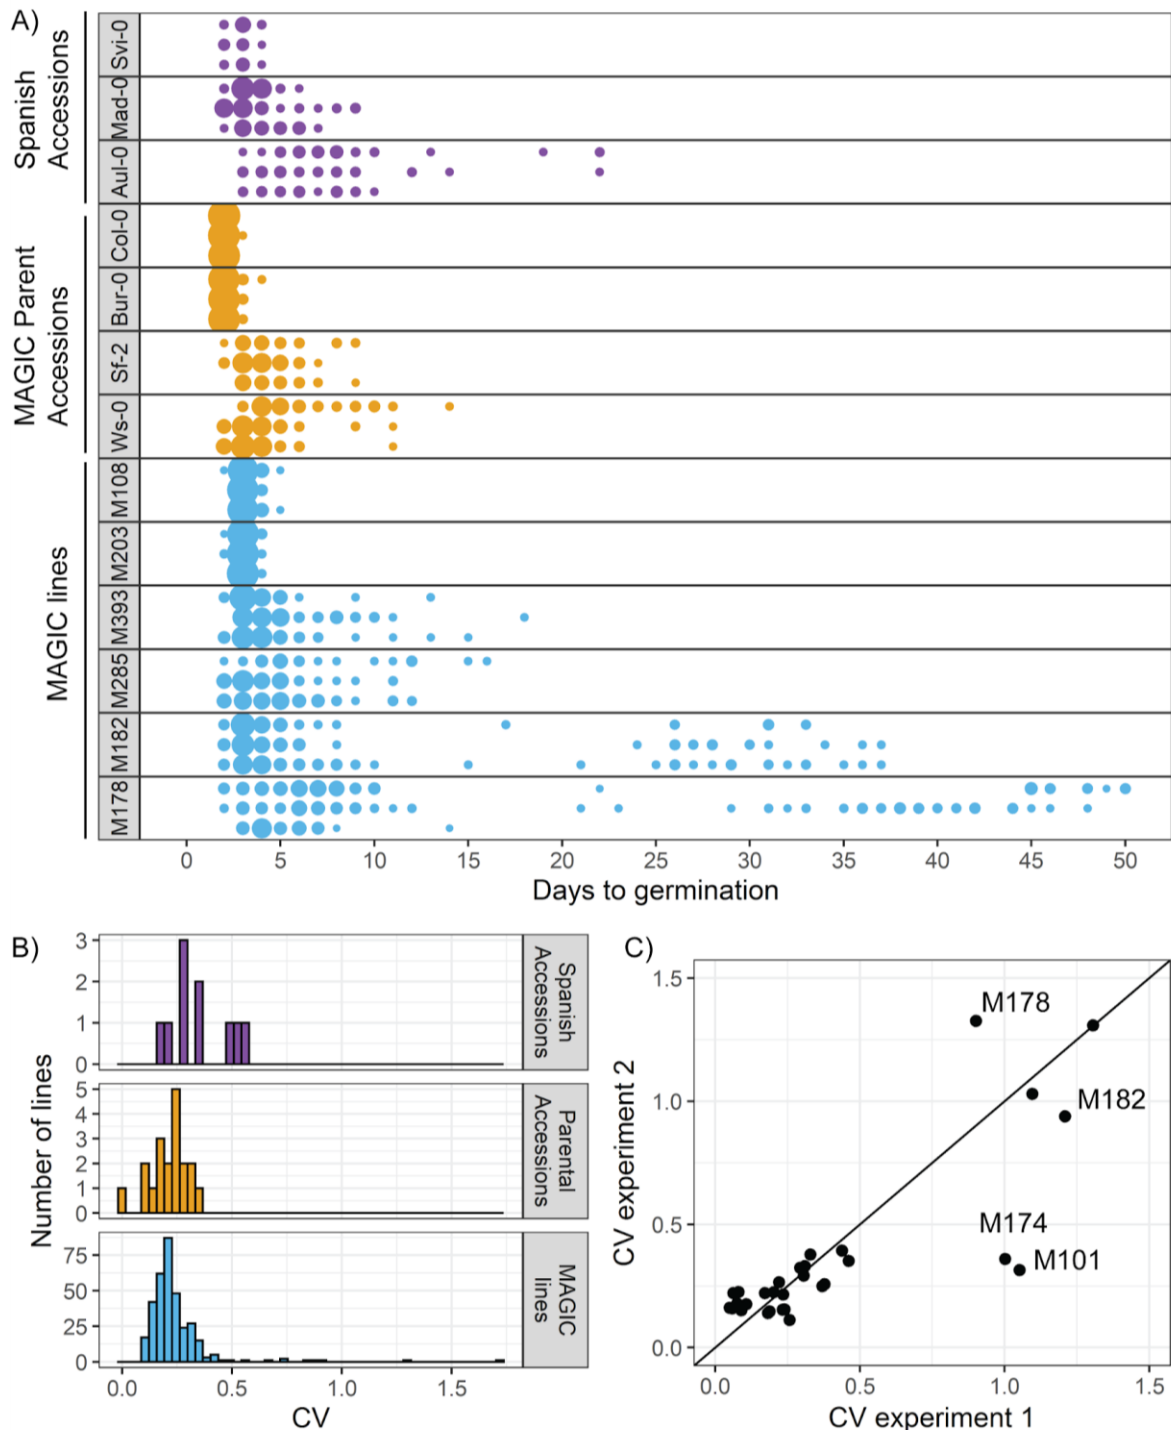

3  
 4 **Figure 1. There is variation in variability in germination times in Arabidopsis. A)** Examples of  
 5 distributions of germination time for natural accessions and MAGIC lines. Each row shows the  
 6 germination time distribution of a seed batch from a different parent plant of a particular line,  
 7 colours represent whether the line is a Spanish accession (purple), MAGIC parent accession (yellow)  
 8 or MAGIC line (blue). The size of the circles is proportional to the percentage of seeds sown that  
 9 germinated on a given day. For the two groups of accessions (Spanish accessions and MAGIC

1 parents), examples of the lowest and highest variability lines are shown. For MAGIC lines, examples  
2 are shown of low variability (top two lines); high variability, long-tailed (middle two lines) and very  
3 high variability bimodal (bottom two lines) lines. **B)** Frequency distribution of coefficient of variation  
4 (CV) of germination times for 10 Spanish accessions (purple), the 19 parental natural accessions that  
5 were used to generate the MAGIC lines (orange) and 341 MAGIC lines (blue). In the majority of  
6 cases, the CV of a given MAGIC line is the mean of the CVs of 3 batches of seeds collected from  
7 separate parent plants. **C)** CV of germination times for a subset of 32 MAGIC lines in two separate  
8 experiments. The batches of seeds for the two experiments were derived from different  
9 independently sown mother plants. The line shows  $y=x$ . Figure 1-figure supplement 1 shows the  
10 level of reproducibility of germination time distributions across replicates, lengths of period of dry  
11 storage, and sowing conditions.

12

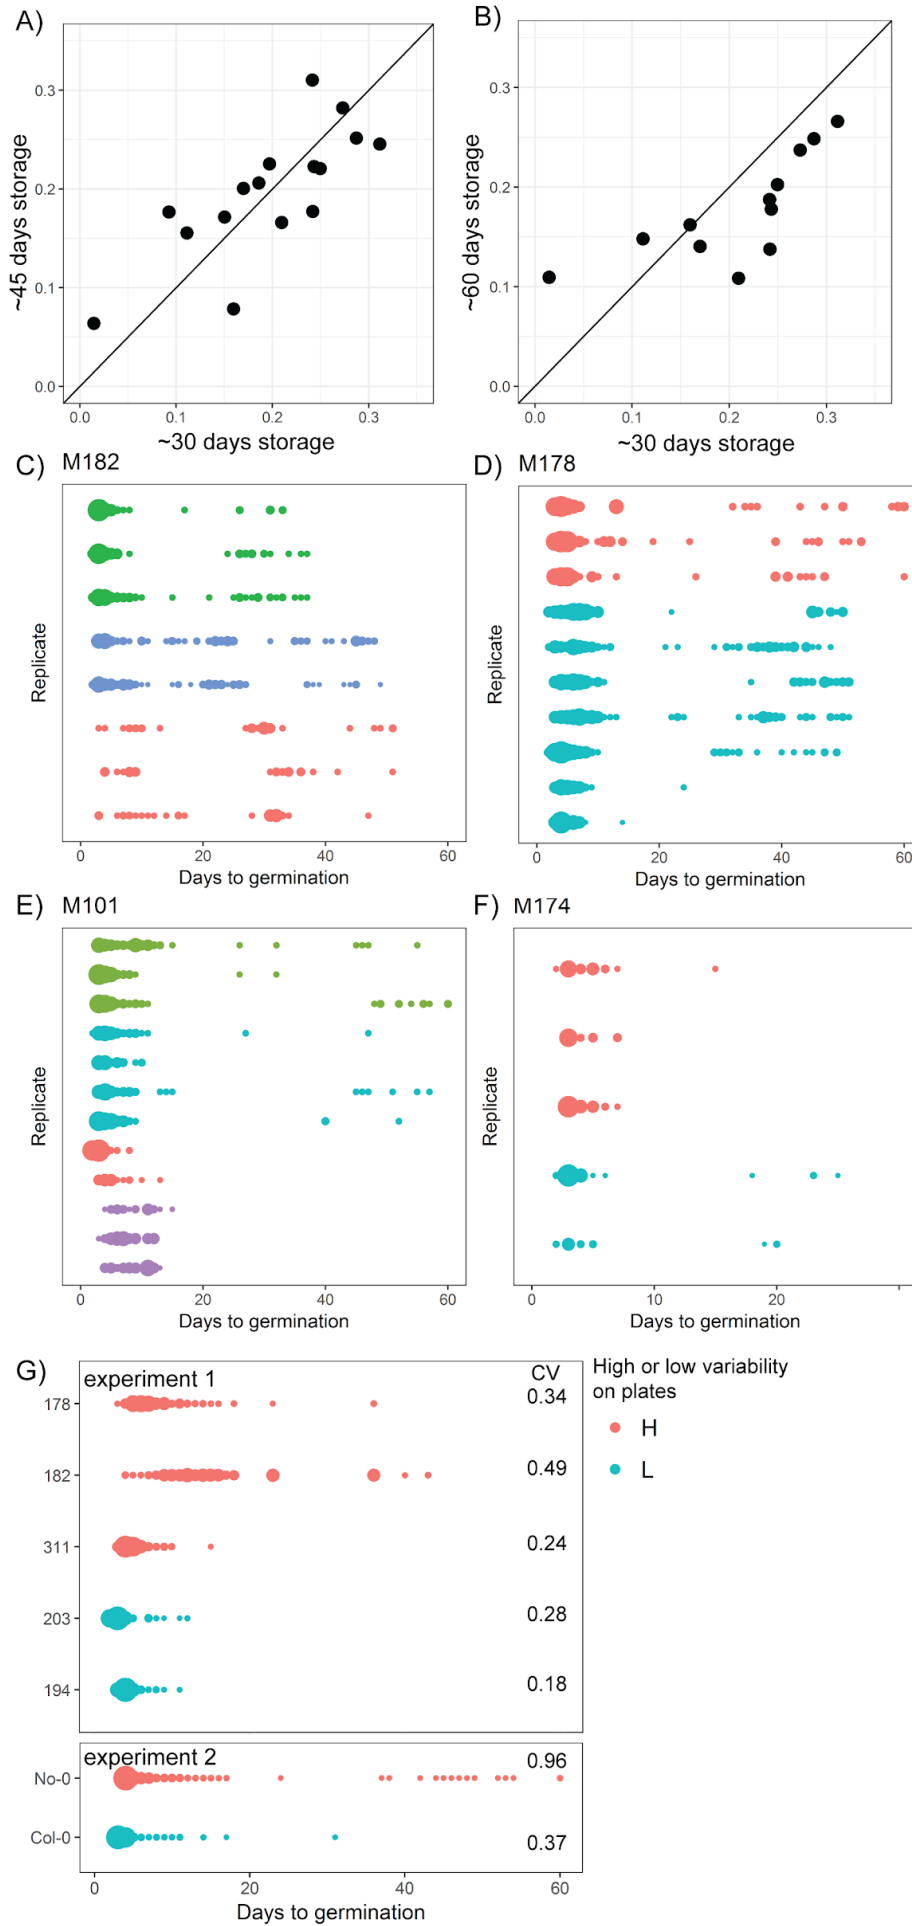



1 **Figure 1- figure supplement 1. Reproducibility of germination time distributions. A) and B)** CVs of  
2 germination time for MAGIC parental accession seeds stored in dry conditions for different lengths  
3 of time following harvest (x and y axis labels indicate time of storage). Each point represents a  
4 different MAGIC parental accession and is the mean CV across three replicate batches of seeds each  
5 collected from a different parent plant. The black lines show  $x = y$ . The experimental comparisons are  
6 for 16 (A) and 12 (B) of the MAGIC parental accessions. For A, Pearson's  $r = 0.77$  (95% CI 0.44, 0.91).  
7 For B, Pearson's  $r = 0.76$  (95% CI 0.32, 0.93). **C) - F)** Germination time distributions of the very high  
8 variability MAGIC lines shown in Figure 1C. Each row shows the germination time distribution of a  
9 seed batch from a different parent plant. Each colour represents seeds collected and sown in a single  
10 experiment, with different colours representing different replicate experiments from different  
11 parental sowings. The size of the circles is proportional to the percentage of seeds that germinated  
12 on a given day. M101 and M174 showed a very late germinating fraction of seeds in some  
13 experiments but not others, whilst bimodal distributions were more consistently detected for M182  
14 and M178. **G)** Distributions of germination times on soil for genotypes that were either high or low  
15 variability when sown on petri-dishes. Within an experiment, lines that were more variable on plates  
16 were also more variable on soil, with the exception of M311.

17

## 18 **Variability in germination times is observed within single siliques**

19 Because germination was characterised for seed samples taken from whole plants, it is possible that  
20 the high variability observed in some lines is due to different siliques (fruits) having different  
21 germination behaviours. This could arise due to differences in the ages of siliques at the time of seed  
22 harvest, or due to positional effects on the parent plant. To address this possibility, we collected  
23 seed from individual siliques from 4 high or very high variability lines and characterised their  
24 germination time distributions. For these lines, the full range of germination times observed in  
25 whole-plant samples was also present in seed from individual siliques (Figure 2A, B; Figure 2-figure  
26 supplement 1). This suggests that variability in seed germination time is not an effect of positional or  
27 age differences between siliques.

28 We next hypothesised that germination time might be related to the position along the main axis of  
29 individual siliques. To test this, we cut siliques into halves and sowed seeds from the top (furthest  
30 from the mother plant) and bottom halves separately. For the lines tested, late and early  
31 germinating seeds were produced by both halves of the siliques, with no consistent differences  
32 between the top and bottom halves in the fraction of seeds that germinated late (Figure 2C; Figure  
33 2-figure supplement 1D). Thus, variability in germination time in the lines tested cannot be explained

- 1 by positional or maturation gradients within the whole plant or individual siliques. This suggests that
- 2 a mechanism exists to generate differences in germination behaviour of equivalent seeds from the
- 3 same silique, which is not dependent on gradients of regulatory molecules along the fruit.

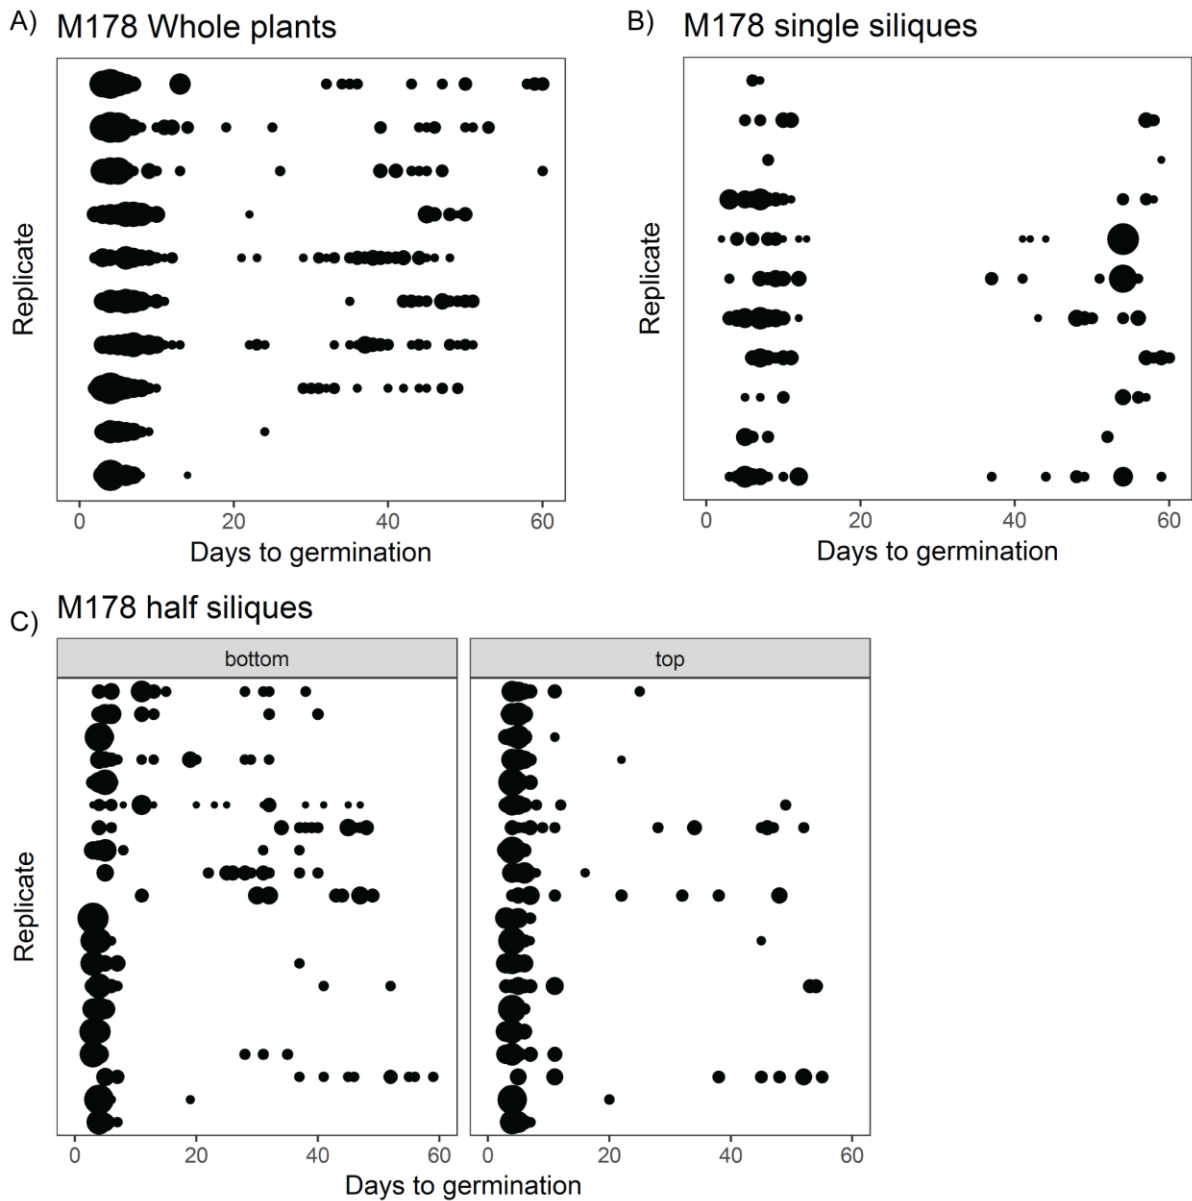

4

- 5 **Figure 2. The full range of germination times can be found in individual siliques.** A) Germination  
6 time distributions for a very high variability line, M178. Each row is the distribution obtained using a  
7 sample of pooled seeds from one plant, with different rows showing data from different mother  
8 plants. B) As for A) but each row represents the distribution obtained using seeds from a single  
9 silique. C) Individual siliques were cut in half and seeds from the top and bottom halves (furthest and  
10 closest to the mother plants, respectively) were sown separately. Each row is the bottom and top  
11 half of a particular silique. Seeds from whole plants, single siliques and half siliques were obtained  
12 and sowed in different experiments. The size of the circles is proportional to the percentage of seeds

- 1 that were sown that germinated on a given day. Figure 2-figure supplement 1 shows examples for
- 2 other MAGIC lines plus an experimental repeat and statistical analysis.

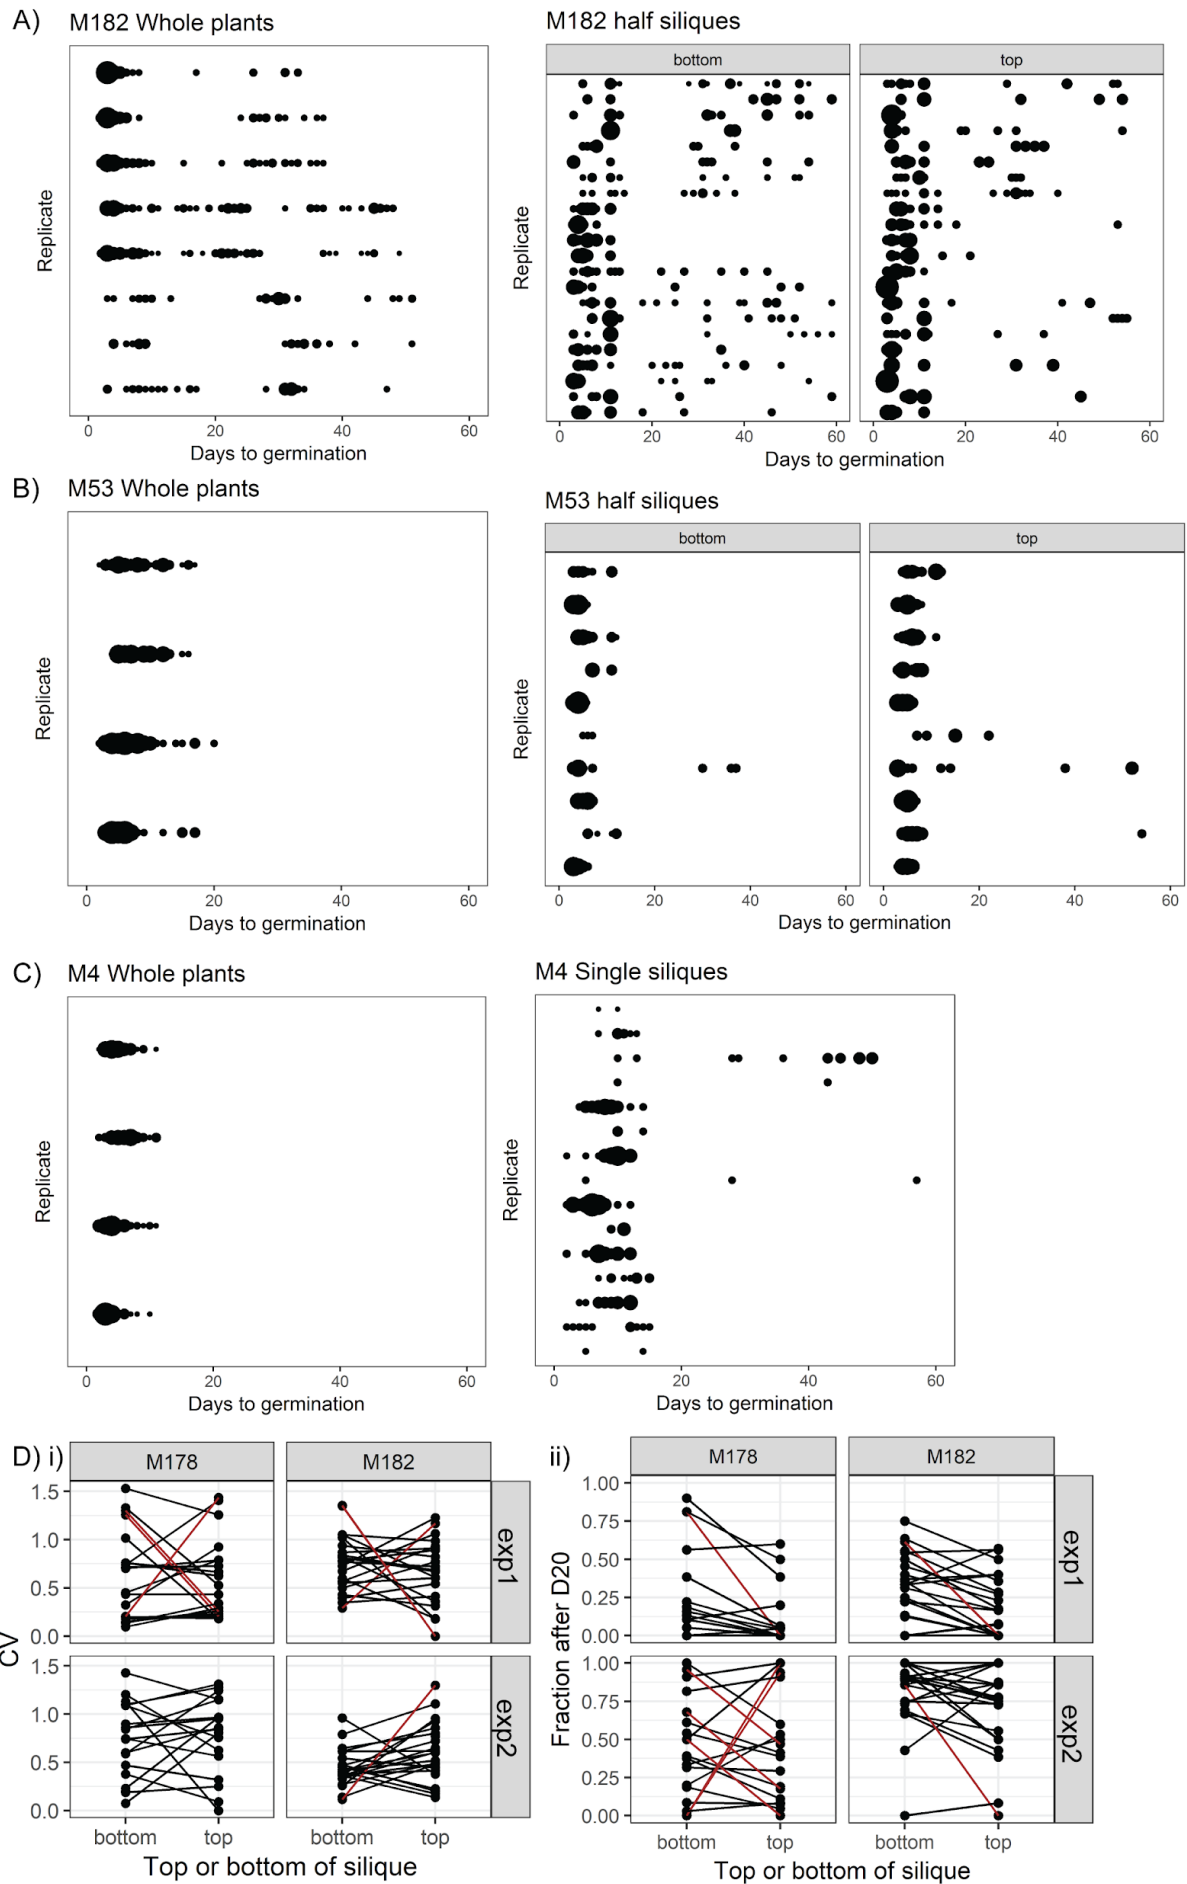

1 **Figure 2-figure supplement 1. Germination time distributions for whole plants and single siliques**  
2 **for high variability lines.** Germination time distributions for M182 (A) and M53 (B), for samples of  
3 seeds pooled from whole plants, or for single siliques separated into top and bottom halves. Seeds  
4 from whole plants and half siliques were obtained and sown in different experiments. For whole  
5 plants, each row is the distribution obtained using a sample of pooled seeds from one plant. For half  
6 siliques, each row is the bottom and top half of a particular silique. The size of the circles is  
7 proportional to the percentage of seeds that were sown that germinated on a given day. C) As for A)  
8 and B) but for M4, showing whole siliques in the right hand panel. D) Comparison of seed  
9 germination times between top and bottom halves of individual siliques for M182 and M178 MAGIC  
10 lines, collected and sown in two independent experiments (exp1 and exp2). Panels show the CV  
11 (panel i) and fraction of late germinating seeds (after day 20, panel ii) from the two halves of each  
12 assayed silique. Brown lines indicate significant differences from the null hypothesis (< 5% false-  
13 discovery rate). This was determined from bootstrap-based tests that accounted for the unequal  
14 number of seeds sown for each silique's half. Note that even when there is a significant difference  
15 between the two silique halves, it is not consistently in the same direction.

16

### 17 **Variability can be uncoupled from modal germination time and percentage germination**

18 To investigate which types of mechanism might underlie variability in the MAGIC population, we  
19 looked at the extent to which variability is correlated with the modal time taken to germinate and  
20 the percentage germination within the experiment. For each line, the experiment was defined as  
21 complete two weeks after no further seed germinated. If high CV strongly correlates with late  
22 germination, or with low percent germination, this would suggest that increased variability in  
23 germination times might be simply an effect of differences in average seed dormancy levels between  
24 MAGIC lines. If high CV occurs without high time to germination or low percent germination, this  
25 would suggest that different lines have different levels of variability independent of their average  
26 seed dormancy levels.

27 We found only a weak correlation between CV and either mode or percent germination, with lower  
28 variability lines (low CV) tending to have a lower mode days to germination and higher percentage  
29 germination (Figure 3A, Figure 3-figure supplement 1A) (CV *versus* mode, Pearson's  $r = 0.27$ , 95% CI  
30 [0.17, 0.37]; CV *versus* percent germination, Pearson's  $r = -0.24$ , 95% CI [-0.34, -0.14]). Thus, some  
31 high variability lines had overall later germination and lower percentage germination than low  
32 variability lines, suggesting that they were generally more dormant (Figure 3D, E). However, there  
33 were lines that had the same mode days to germination, with very different CVs (Figure 3B, C) and

1 *vice-versa*, lines with the same CV showed a range of modes (Fig 3A ii). There were also lines that  
2 were very similar with respect to both percentage germination and mode days to germination, but  
3 that had very different CVs (Figure 3-figure supplement 1B, C). Thus, within the MAGIC population,  
4 variability can be uncoupled from percentage germination and modal germination time, with low  
5 correlation between these traits. The same trends were observed in the natural accessions, where  
6 CV was correlated with mode and percentage germination but accessions could be found with  
7 similar mode and percentage germination and different CVs (Figure 3-figure supplement 2), raising  
8 the possibility that these traits could be under independent selection in nature.

9

10

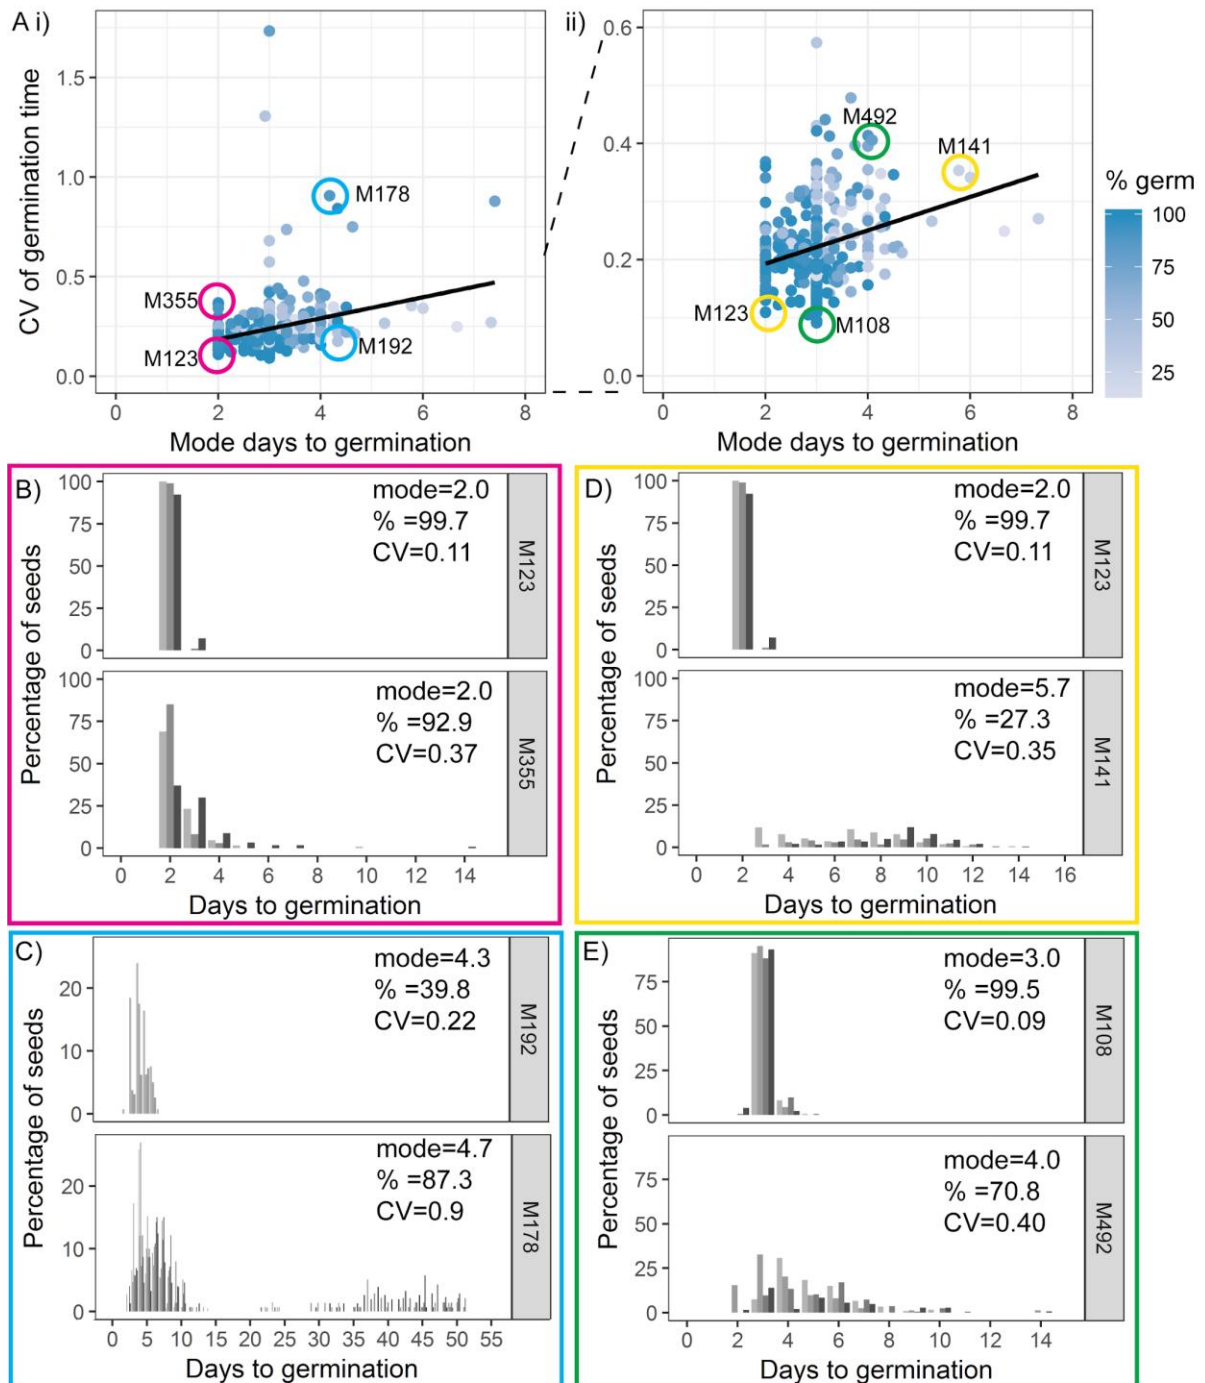

1  
2 **Figure 3. Variability can be uncoupled from modal germination time.** A) Scatter plots of CV of  
3 germination time *versus* mode days to germination for 341 MAGIC lines. Each point is a specific  
4 MAGIC line, and in the majority of cases, the CV and mode are mean values obtained from sowing  
5 one batch of seeds from each of three separate parent plants. Each point is shaded according to the  
6 percentage germination of the line (see scale bar). Coloured circles and labels indicate lines for  
7 which examples are shown in B-E. ii) is a zoom in of i) including only lines with CV < 0.6. Black lines  
8 are linear regressions. B-E) Distributions of germination times for pairs of MAGIC lines. The colour of  
9 the box matches the coloured circles in A). Lower CV lines are shown on top. Grey coloured bars  
10 show the germination distribution of seed batches from replicate mother plants. B and C) Exemplar  
11 lines with the same mode days to germination but different CVs of germination time. D and E) Lines  
12 that have different CVs and different mode days to germination. For each line, the mode days to

1 germination, final percentage germination and CV of germination time are shown. Note that the x-  
 2 axis scale differs between plots. Figure 3-figure supplement 1 shows the relationship between CV  
 3 and percentage germination for MAGIC lines. Figure 3-figure supplement 2 shows relationships  
 4 between CV, mode and percentage germination for natural accessions.

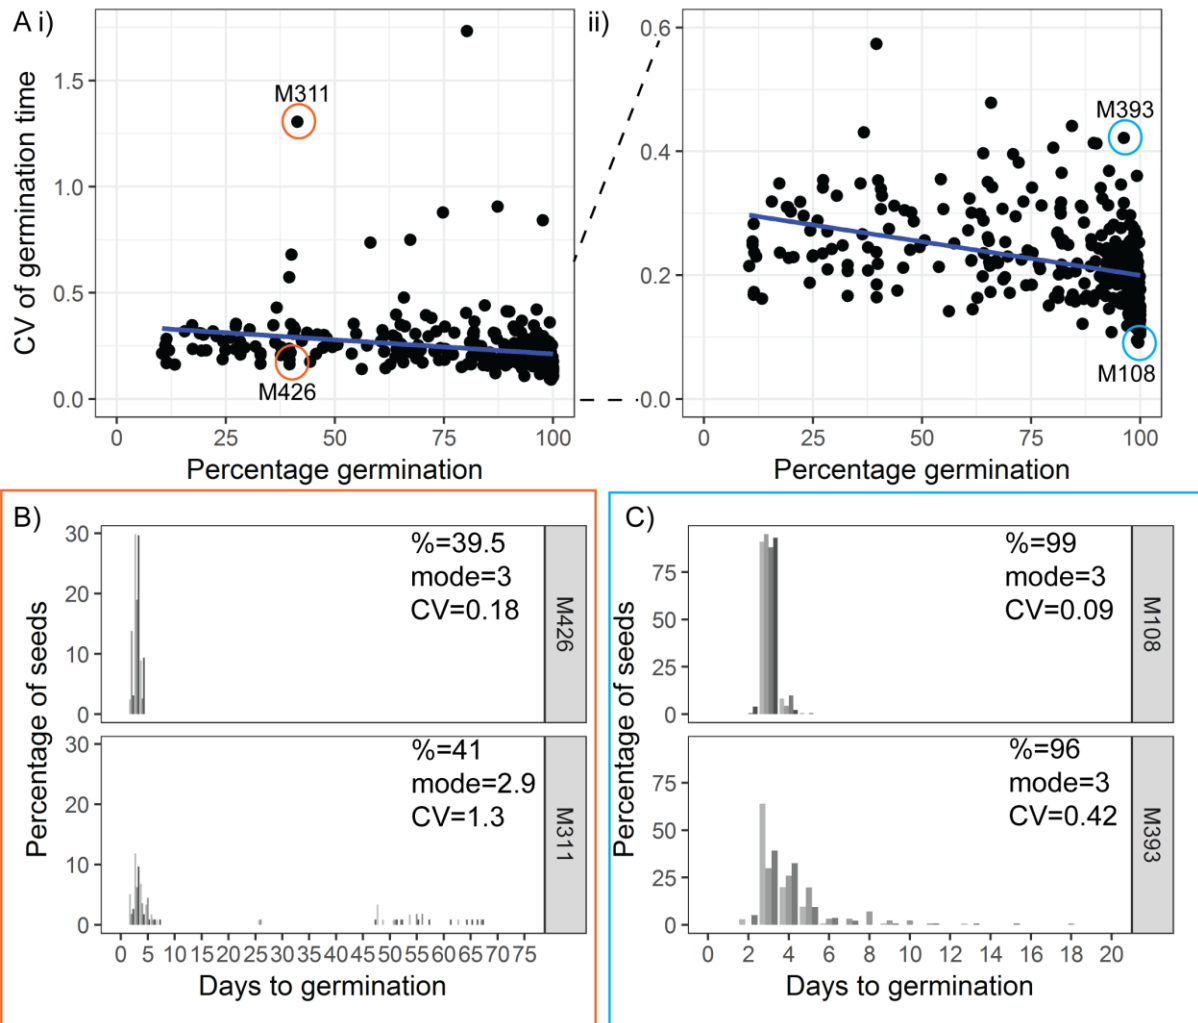

5  
 6 **Figure 3-figure supplement 1. Variability can be uncoupled from percentage germination. A)**  
 7 Scatter plots of CV of germination time, *versus* percentage germination, for 341 MAGIC lines. Each  
 8 point is a specific MAGIC line, and in the majority of cases, the CV and percent are mean values for  
 9 three batches of seeds from separate parent plants. Coloured circles and labels indicate lines for  
 10 which examples are shown in B-C. ii) is a zoom in of i), including only lines with CV < 0.6. Blue lines  
 11 are linear regressions. **B-C)** Distributions of germination times for exemplar MAGIC lines that have  
 12 similar final percentage germination and mode days to germination but different CVs. The colour of  
 13 the box matches the lines to the coloured circles in A. Lower CV lines are shown on top. Grey  
 14 coloured bars show the distribution of germination time for seed batches from replicate mother



1 plants. Note that the x-axis scale differs between B and C.

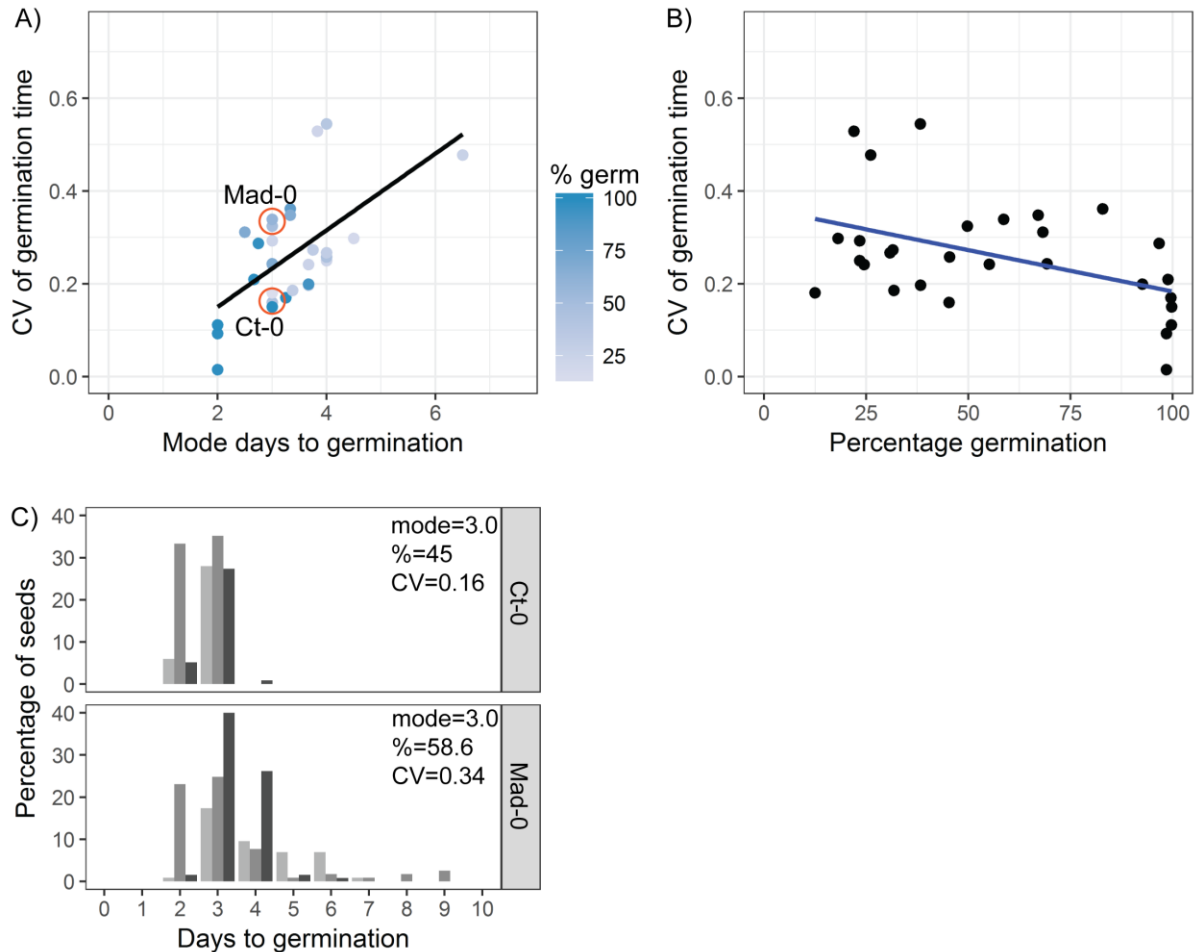

2

3 **Figure 3-figure supplement 2. The relationship between CV, mode days to germination and**  
4 **percentage germination in natural accessions. A)** Scatter plot of CV of germination time *versus*  
5 mode days to germination for the 19 parental accessions of the MAGIC lines and 10 Spanish  
6 accessions. Each point is a specific accession, and the CV and mode are means for one batch of seed  
7 from each of at least three separate parent plants. Each point is shaded according to the percentage  
8 germination of the line (see scale bar). Orange circles indicate lines for which examples are shown in  
9 C. Trend line is a linear regression. For CV *versus* mode, Pearson's  $r = 0.61$ , 95% CI [0.31, 0.79]. **B)** As  
10 for A, but showing CV *versus* percentage germination. For CV *versus* percent germination, Pearson's  
11  $r = -0.46$ , 95% CI [-0.71, -0.11]. **C)** Distribution of germination times for exemplar accessions, with  
12 similar mode and percentage germination but different CVs (accessions indicated in A). Grey  
13 coloured bars show the distributions of germination for seed batches from replicate mother plants.

14

### 15 **QTL mapping in MAGIC lines reveals a candidate variability-specific locus**

16 We next performed QTL mapping on the germination data for the MAGIC lines (Kover et al., 2009) to  
17 investigate the genetics of germination time variability. The full set of MAGIC lines phenotyped  
18 includes lines with different types of germination time distributions. All low variability lines and most

1 high variability lines have unimodal distributions of germination time (e.g. Figure 1A, M108, M203,  
2 M305, M393, M285). However, there are 8 lines that tend to have bimodal distributions when sown  
3 on agar (e.g. Figure 1A, M182 and M178). As such, these lines lie at the extreme tail of the  
4 distribution of CVs, with much higher values than the other lines (Figure 1B). Therefore, we ran our  
5 QTL scans both with and without the bimodal lines, as their extreme values may affect the QTL  
6 results disproportionately (Figure 4A, B).

7 QTL mapping for both the full set of lines, and the set excluding outliers, revealed a region of  
8 chromosome 3 that accounted for ~14% of the variance in CV of germination time for the MAGIC  
9 lines used (Figure 4A, B). The region of significant association was broad and spanned the  
10 centromere. The tip of the peak co-located with the previously identified *DELAY OF GERMINATION 6*  
11 QTL (*DOG6*), at 15.9 Mb (Bentsink et al., 2010; Hanzi, 2014). This chromosome 3 QTL was also  
12 associated with mean days to germination, mode days to germination and percentage germination,  
13 suggesting this locus is a general regulator of germination time, rather than specifically affecting  
14 variability (Figure 4-figure supplement 1).

15 To investigate whether other loci explained any residual variance not explained by this major locus,  
16 we ran the QTL scans using the chromosome 3 QTL genotype as a covariate in the model. This  
17 revealed a further putative QTL at 19.8 Mb on chromosome 5 associated with CV (Fig 4 B). Unlike the  
18 chromosome 3 locus, this one showed no association with mode or mean days to germination and  
19 was not significantly associated with percentage germination (Figure 4-figure supplement 1),  
20 suggesting that it may specifically regulate variability independently from the average germination  
21 time and level of dormancy. This locus accounts for an extra 9% of the variance in CV of the MAGIC  
22 lines used. The QTL peak lies ~1.2 Mb downstream of the *DELAY OF GERMINATION 1* (*DOG1*,  
23 *AT5G45830*) gene (at 18.59 Mb) and ~1.2 Mb upstream from the *Seedling Emergence Time 1* (*SET1*)  
24 locus (at ~21 Mb) (Footitt et al., 2019). The QTL scans with and without the bimodal lines were very  
25 similar for the four germination traits (CV, mean, mode days to germination and percentage

- 1 germination) except the Chr5 peak was not significantly associated with CV when bimodal lines were
- 2 included (Fig 4A; Figure 4-figure supplement 1).

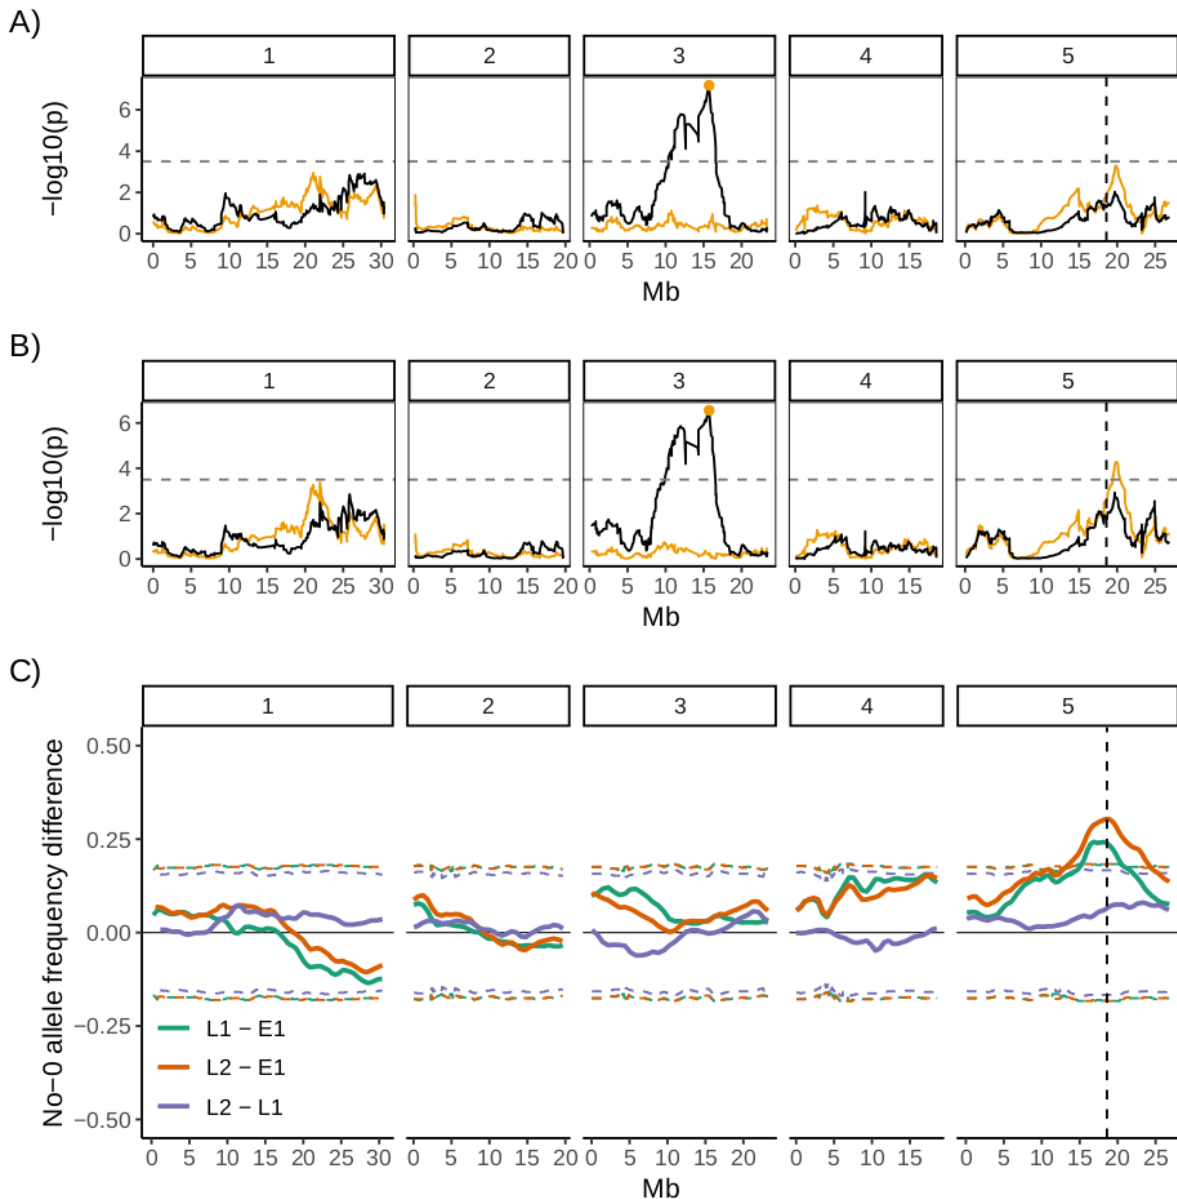

3  
4 **Figure 4. QTL and bulk segregant mapping reveals two QTL underlying CV of germination time. A)**  
5 **and B)** Manhattan plots showing the QTL association results for each marker individually (black line)  
6 and for each marker together with the Chr 3 QTL marker added as a covariate in the model (orange  
7 line). The marker used as a covariate is highlighted with an orange point. A) is for the full set of 341  
8 MAGIC lines that was phenotyped and B) excludes the 8 bimodal lines with very high CV. The y-axis  
9 shows the p-values for the 1254 markers used, on a negative  $\log_{10}$  scale. The numbered panels  
10 represent the 5 chromosomes of Arabidopsis. The horizontal dashed line shows a 5% genome-wide  
11 threshold corrected for multiple testing (based on simulations in Kover et al, 2009). The vertical  
12 dashed line indicates the *DOG1* gene. Figure 4-figure supplement 1 shows QTL mapping for mean  
13 and mode days to germination and percentage germination. Figure 4-figure supplement 2 shows  
14 estimated effects of accession haplotypes on CV, mode and percent germination. **C)** Mapping QTL by  
15 bulk-segregant analysis using whole-genome pooled sequencing of F2 pools from a Col-0 x No-0  
16 cross. One early and two late germinating F2 pools were sequenced. The plot shows the No-0 allele

1 frequency differences between pairs of pools indicated in the legend (Figure 4-figure supplement 3  
2 shows details of pool selections, E1= early pool, L1= late 1 pool, L2= late 2 pool). The horizontal  
3 dashed lines indicate the 95% thresholds based on simulating the null hypothesis of random allele  
4 segregation, taking into account the size of the sampled pools and the sequencing depth at each site  
5 (Magwene et al., 2011; Takagi et al., 2013). Positive values above the top line indicate enrichment  
6 for No-0 alleles, while negative values below the bottom line indicate enrichment for Col-0 alleles. As  
7 predicted, late germinating pools were enriched for the No-0 haplotype in the region of the Chr5  
8 QTL. Here the peak of association overlaps with the *DOG1* gene (dashed vertical line). Figure 4-figure  
9 supplement 4 shows germination phenotypes of F3 seeds from Col-0 x No-0 F2 plants that  
10 themselves germinated early or late.

11

12

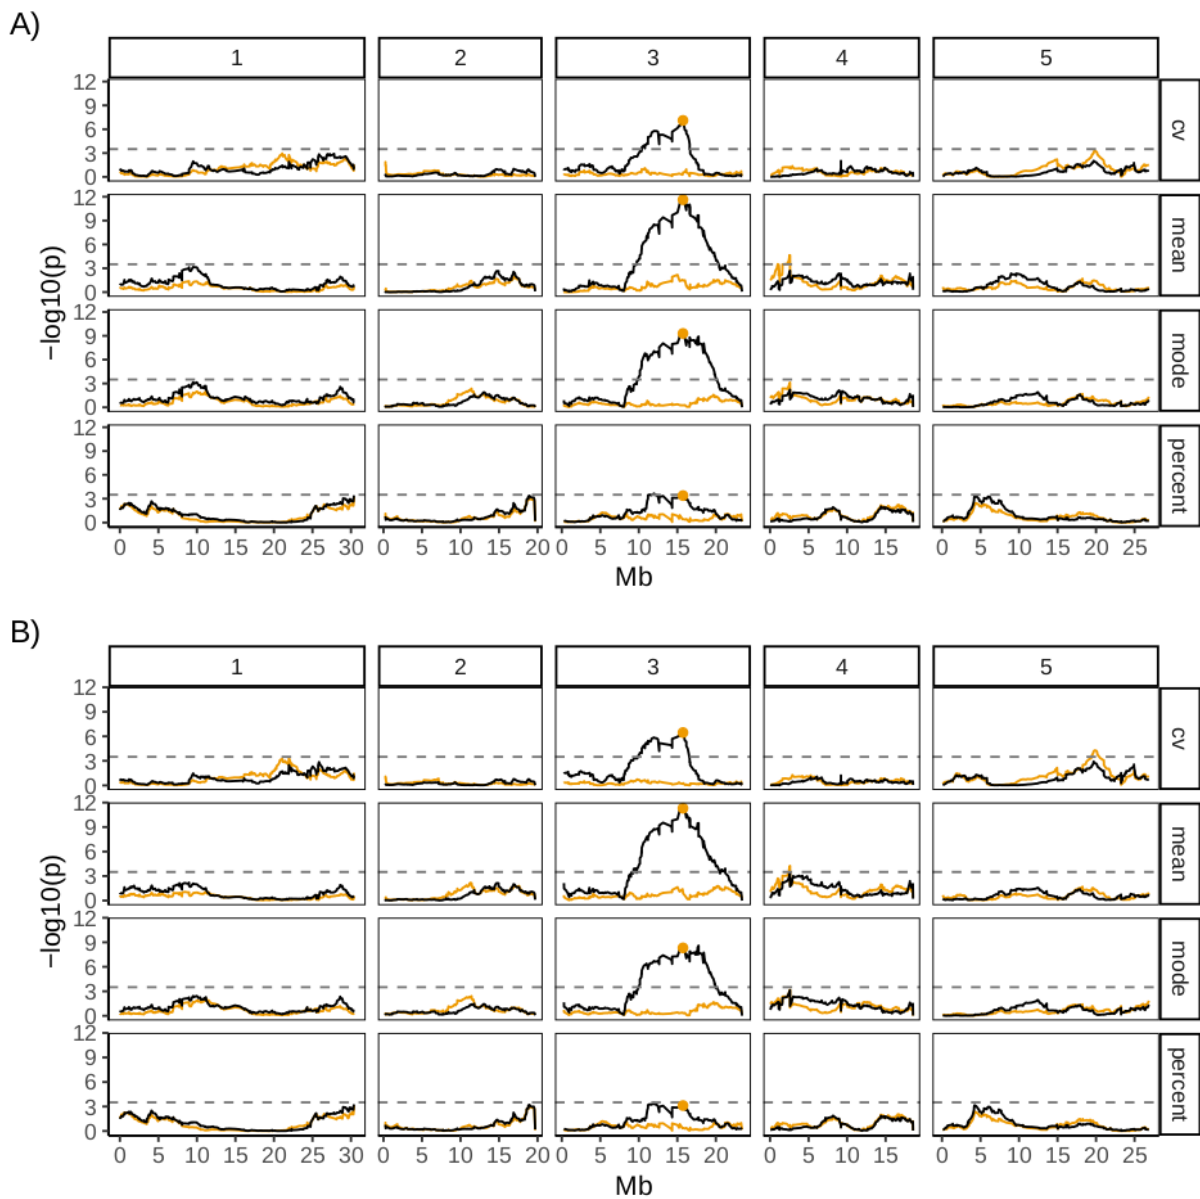

13

14 **Figure 4-figure supplement 1. QTL mapping for germination traits, with and without bimodal**  
15 **MAGIC lines. A)** is for all 341 MAGIC lines that were phenotyped, **B)** is for 333 of these lines (the full  
16 set minus the 8 bimodal lines with very high CV). The y-axis shows the p-values for the 1254 markers  
17 used, on a negative log<sub>10</sub> scale. The numbered panels represent the 5 chromosomes of Arabidopsis

1 and the scan was performed for 4 germination traits: CV of germination time, mean germination  
2 time, mode germination time and percentage germination. The horizontal dashed line shows a 5%  
3 genome-wide threshold corrected for multiple testing (based on simulations in Kover *et al.*, 2009).

4

5 We next estimated the effects of particular accession haplotypes at the two QTL on the different  
6 germination traits (Figure 4-figure supplement 2). This revealed that for the Chr3 QTL, but not for  
7 the Chr 5 QTL, there was a weak positive correlation between the CV of germination time of the  
8 parental accessions and the estimated effect of their QTL haplotypes on CV in the MAGIC lines  
9 (Figure 4-figure supplement 2A). For the chromosome 3 QTL, there was a relatively strong negative  
10 correlation between haplotypic effects on CV and percent germination, and a positive correlation  
11 between effects on CV and mode (Figure 4-figure supplement 2B-C). This supports the conclusion  
12 that this QTL is a general regulator of seed germination time. For the chromosome 5 QTL, there was  
13 a negative correlation between haplotypic effects on CV and percent germination, but there was no  
14 correlation between their effects on CV and on mode (Figure 4-figure supplement 2B-C). This  
15 suggests that the chromosome 5 QTL may influence variability independently of the average time to  
16 germination, but may also have an effect on the percentage germination.

17 To confirm the effect of the chromosome 5 QTL on CV in an independent experiment, we used an F2  
18 bulked segregant mapping approach in a cross between two accessions (Col-0 and No-0) predicted  
19 to have haplotypes in this genomic region with different effects on CV (Figure 4-figure supplement 2  
20 A, Chr5 panel). We performed whole genome sequencing on pools of F2 plants that germinated late,  
21 and so were predicted to be enriched for the No-0 haplotype at ~20Mb on Chr5, promoting high CV,  
22 and compared their sequences to those of a pool of early germinating F2 plants (Figure 4C, for  
23 details of pools see Figure 4-figure supplement 3). The results independently verified that a locus at  
24 ~20Mb of Chr5 has an influence on CV. In this experiment, the peak of association was located at  
25 18.6Mb on Chr5, which overlaps precisely with the *DOG1* gene (Figure 4C). We also quantified  
26 germination traits of the F3 offspring of F2 plants that themselves germinated early or late. This  
27 showed that late germinating F2 plants produced seed with higher CVs of germination time, lower

- 1 percentages of germination and similar average germination times compared to seeds of early
- 2 germinating F2 plants (Figure 4-figure supplement 4).

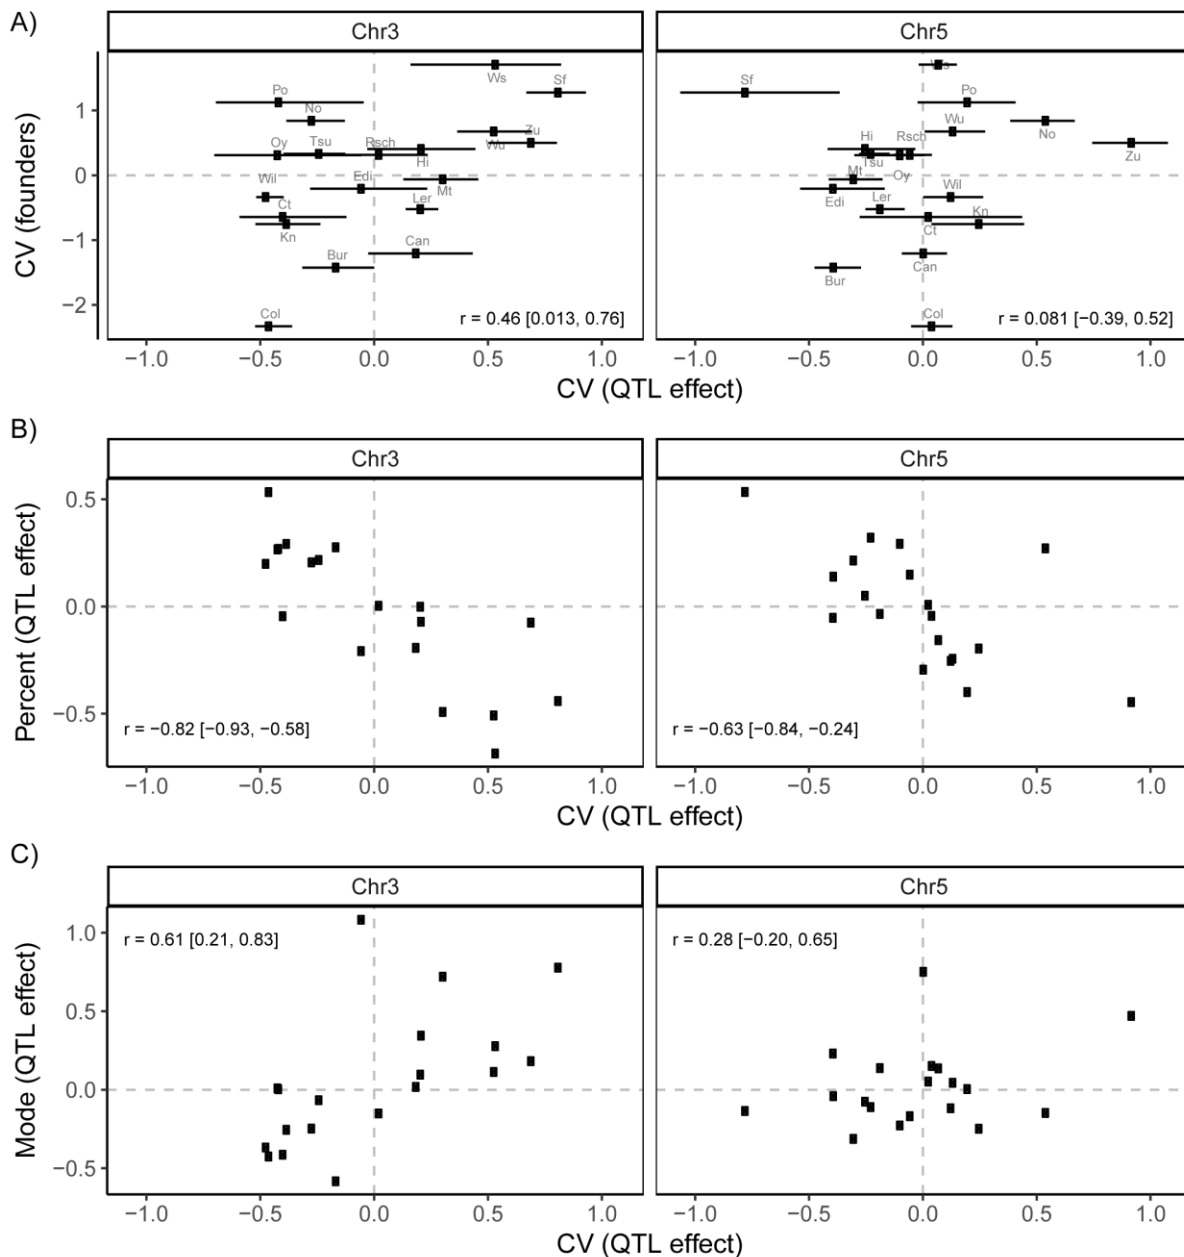

- 3
- 4 **Figure 4-figure supplement 2. Accession-specific QTL effects on CV, mode and percent**
- 5 **germination. A)** Correlation between the germination CV of the founder accessions and the
- 6 predicted accession effects at the two putative QTL on Chr 3 and Chr 5 (Fig 4). The effects of the 19
- 7 parental accession haplotypes were estimated by calculating the mean CV of MAGIC lines inferred to
- 8 carry each particular haplotype. **B)** Correlation between predicted QTL effects on percent
- 9 germination and CV. **C)** Correlation between predicted QTL effects on mode days to germination and
- 10 CV. In all panels, the mean effect of each parental accession's QTL allele was estimated from the
- 11 probabilistic assignment of each MAGIC line to that founder parent (Kover et al 2009). Error bars in
- 12 panel A) show the 95% confidence intervals of these estimates (these were omitted from the other
- 13 panels for clarity). All trait values were standardized, so that axis units represent the number of

- 1 standard deviations away from the respective mean, with the horizontal and vertical dashed lines at
- 2 zero highlighting the mean of the respective trait in the population. Pearson's correlation,  $r$ , is
- 3 indicated in each panel, with the 95% confidence interval in brackets.

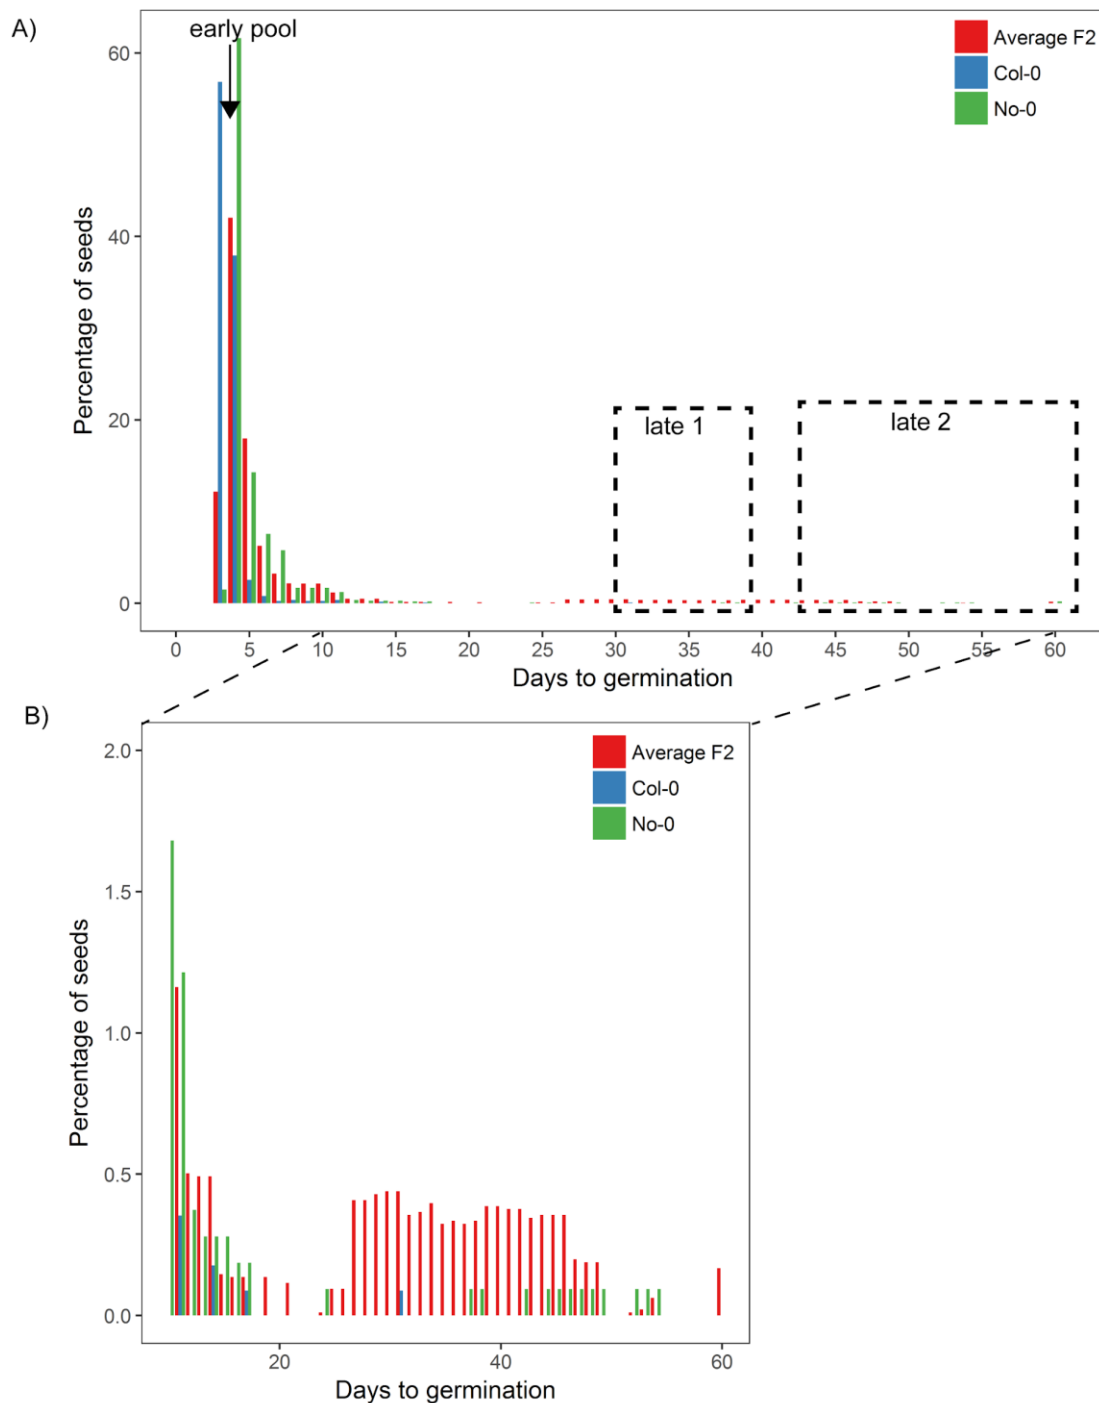

- 4
- 5
- 6
- 7
- 8
- 9
- 10
- 11

**Figure 4-figure supplement 3. Germination time distributions and DNA-seq pools of Col-0 x No-0 F2.** 8 batches of Col-0 x No-0 F2 seeds, each containing ~1100 seeds and collected from a different F1 parent plant, were sown on soil. Seeds from parental accessions Col-0 and No-0 were also included in the experiment and for these, batches of ~1100 seeds pooled from 3 parent plants were sown for each accession. The different F2 batches behaved similarly, so here we present an averaged distribution based on bulked data. The percentage germination each day is a percentage of

1 all seeds that germinated (rather than of all seeds that were sown). **A)** shows the full germination  
 2 time distribution with pools used for DNA sequencing highlighted and **B)** shows days 10-60, with a  
 3 different y axis scale to show the late germinating seeds. The early pool used for sequencing was  
 4 composed of 152 individuals that germinated on day 4; the “late 1” pool was composed of 321  
 5 individuals that germinated between days 31 and 39 and the “late 2” pool was composed of 213  
 6 individuals that germinated between days 43 and 60. We reasoned that, since late germination is  
 7 predominantly restricted to the more variable parent (No-0), late germinating F2 plants should be  
 8 enriched for the No-0 accession at loci promoting high variability (including the chr5 locus at ~20Mb  
 9 where the No-0 haplotype is predicted to promote high CV).  
 10  
 11  
 12

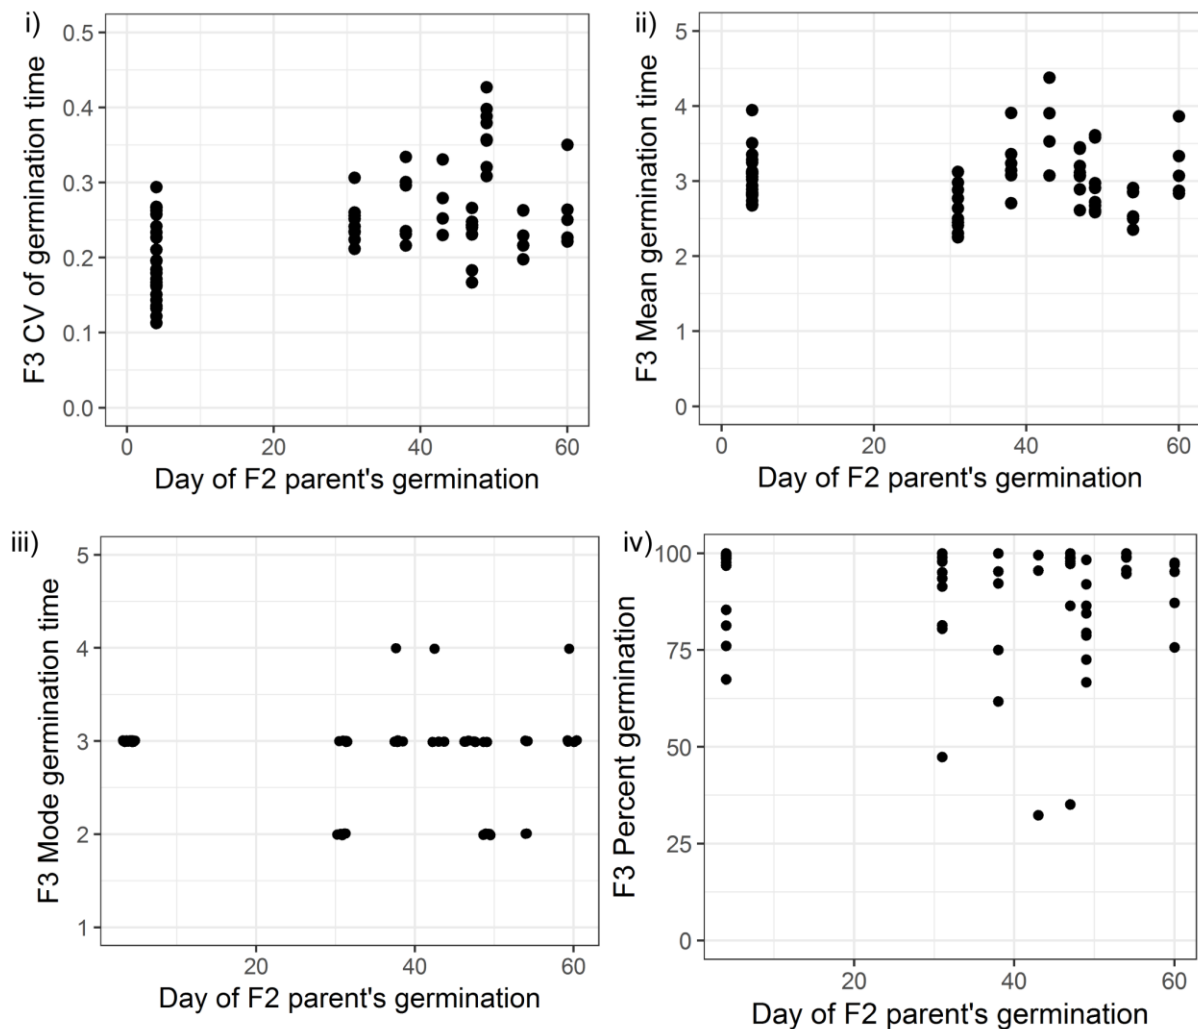

13  
 14 **Figure 4-figure supplement 4. Germination phenotypes of F3 seeds from Col-0 x No-0 F2 parent**  
 15 **plants that themselves germinated early or late.** CV, mean, mode and percent germination for F3  
 16 seeds collected from F2 plants that themselves germinated at different times (x axis). Batches of  
 17 seeds from F2 plants that germinated late (between days 30 and 60) had, on average, a significantly  
 18 higher CV than seeds from plants that germinated early (on day 4) (the mean CVs of the two groups  
 19 were 0.19 in the early group *versus* 0.27 in the late group, Wilcoxon rank sum test  $W = 199$ ,  $p$ -value  
 20  $= 1.163e-05$ ,  $n=23$  for seeds from early germinators,  $n=47$  for seeds from late germinators). Seeds of  
 21 late germinating plants did not tend to have higher mean or mode germination times (the mean of  
 22 mean germination times was 3.05 days in the early group *versus* 3 days in the late group; the mean  
 23 of mode germination times was 3.00 in the early group *versus* 2.78 in the late group). Percentage  
 24 germination shows a small but significant difference between the two groups of F3 seeds (mean



1 percentage germination: 95.3 in the early group *versus* 87.67 in late group, Wilcoxon rank sum test  
2  $W = 754$ ,  $p$ -value = 0.00419,  $n=23$  for seeds from early germinators,  $n=47$  for seeds from late  
3 germinators).

4  
5

6 In summary, we have shown that at least two loci contribute to variability in seed germination time  
7 in the MAGIC lines (chromosome 3, ~16 Mb and chromosome 5, ~18.6/ 19.8 Mb). Although  
8 variability can be separated from mode days to germination and percentage germination, the main  
9 QTL on chromosome 3 has correlated effects on all these three traits. The locus at ~19 Mb on  
10 chromosome 5 appears to affect variability independently of average time to germination and likely  
11 accounts for some of the variation in CV that occurs even for lines with the same mode days to  
12 germination.

13 The chromosome 5 peak obtained in the bulk segregant mapping overlaps with the *DOG1* gene  
14 known to play a role in seed dormancy level. The peak obtained in the QTL mapping is slightly shifted  
15 and lies equidistant between *DOG1* and the nearby *SET1* locus (at ~21Mb) which affects dormancy  
16 levels in the field in response to environmental conditions. Consistent with a role for this region of  
17 chromosome 5 in seed dormancy in the MAGIC lines, its haplotypic effects on CV and on percentage  
18 germination were negatively correlated (Figure 4-figure supplement 2 B, Chr5 panel). Additionally,  
19 our Col-0 x No-0 F2 and F3 analysis suggested that seeds from plants enriched for the No-0  
20 haplotype at this locus (which is associated with high CV) had a lower percentage germination than  
21 seeds from plants enriched for the low CV Col-0 haplotype (Figure 4-figure supplement 4). However,  
22 perhaps surprisingly, this locus was not significantly associated with percentage germination in the  
23 QTL mapping (Figure 4A, B). This may be because, unlike the Cvi accession that was used originally to  
24 map both *DOG1* and *SET1* loci (Alonso-Blanco et al., 2003; Footitt et al., 2019) the accessions used to  
25 generate the MAGIC lines have relatively weak dormancy and may not carry alleles in this region  
26 that promote dormancy sufficiently strongly to be detected in the QTL mapping.

27 **A stochastic model of the GA/ABA bistable switch can account for the observed genetic**  
28 **variation in germination time distributions**

29

1  
2 There is evidence to suggest that candidate genes underlying our identified loci are related to ABA  
3 signalling or sensitivity. The effect of the *DOG6* locus overlapping our chromosome 3 QTL is thought  
4 to be caused by the *ANAC060* gene, which regulates ABA sensitivity (Hanzi, 2014; Li et al., 2014).  
5 Both the *DOG1* gene and the *SET1* locus possibly underlying the chromosome 5 peak have been  
6 proposed to modulate ABA signalling (Footitt et al., 2019; Fuchs et al., 2013; Née et al., 2017). This  
7 raises the question of how genetic loci could have different effects on germination time distributions  
8 by influencing the ABA pathway. To answer this, we built a simplified mathematical model of the  
9 core ABA-GA network that governs germination time (Liu and Hou, 2018) (Figure 5A). We wished to  
10 understand whether different parts of the network could be modulated to have either correlated or  
11 distinct effects on CV, mode and percentage germination.

12  
13 The model captures the relationships between the hormones ABA and GA and the key  
14 transcriptional regulators that act as inhibitors of germination, such as DELLAs, ABI4 and ABI5  
15 (Ariizumi et al., 2008; Liu et al., 2016; Piskurewicz et al., 2008; Shu et al., 2016; Tyler et al., 2004). We  
16 represent these germination inhibitors as one factor, called Integrator. We model the net effects of  
17 ABA and GA on the germination inhibitors by assuming that the production of Integrator is  
18 promoted by ABA, and that its degradation is promoted by GA (Figure 5A) (Ariizumi et al., 2008; Liu  
19 et al., 2016; Piskurewicz et al., 2008; Shu et al., 2016; Tyler et al., 2004). The germination inhibitors  
20 are known to feed-back to influence GA and ABA levels through effects on their biosynthesis or  
21 catabolism (Ko et al., 2006; Oh et al., 2007; Piskurewicz et al., 2008; Shu et al., 2016, 2013). This  
22 feedback is represented in the model by assuming that Integrator promotes the production of ABA  
23 (Ko et al., 2006; Zentella et al., 2007) and inhibits the production of GA (Shu et al., 2013), (Oh et al.,  
24 2007). To capture the inhibitory effect of the DELLAs, ABI4 and ABI5 on germination, we assume that  
25 in each seed the integrator level must drop below a threshold for germination to occur. We simulate  
26 a light-induced increase in GA biosynthesis rate upon sowing (Derkx and Karssen, 1993; Oh et al.,

1 2007, 2006). Full details and justifications of the model assumptions are provided in the materials  
2 and methods section.

3

4 The model behaves as a mutual inhibition circuit (GA inhibits Integrator and *vice-versa*) and a mutual  
5 activation circuit (ABA promotes integrator and *vice-versa*) coupled by the Integrator (Figure 5A).

6 Overall this constitutes a double positive feedback loop that can act as a bistable switch, where

7 there are two stable steady state solutions: high GA, low ABA and low Integrator resulting in

8 germination; or low GA, high ABA, high Integrator resulting in no germination (Figure 5-figure

9 supplement 1A). We hypothesised that variability in germination time is generated from stochastic

10 fluctuations in the dynamics of the underlying gene regulatory network. To model these stochastic

11 fluctuations, we adopt the chemical Langevin equation formalism (see methods), which takes into

12 account the intrinsic stochasticity of the chemical reactions happening within the cell throughout

13 time (Adalsteinsson et al., 2004; Gillespie, 2000).

14

15 Although the model is a simplified representation of the interactions between GA and ABA, it can

16 make predictions concerning network behaviour. We found that, by modulating its parameters, we

17 could generate a range of germination time distributions, from less variable (i.e. more peaked), to

18 more variable (i.e. long tailed) that qualitatively match the range of germination distributions we

19 observe experimentally (Figure 5-figure supplement 2).

20

21 We performed parameter screens in the model to investigate the extent to which particular

22 parameters could have decoupled effects on CV and mode. Specifically, we varied the basal

23 production and degradation rates of ABA, GA and Integrator, the parameters governing the

24 sensitivity of the interactions between the three factors, as well as the level of noise in the system.

25 We performed 2D parameter explorations to check the effect of varying a given parameter for a

1 range of values of a second parameter, to ensure that the behaviours observed were robust across a  
2 range of parameter sets (Figure 5-figure supplement 3).

3

4 We found that the model could capture multiple possible relationships between the CV and mode of  
5 germination time distributions, with the nature of the relationship changing depending on which  
6 parameter was being varied. A number of parameters had positively correlated effects on CV and  
7 mode although the strength of this correlation varied depending on the region of parameter space  
8 and the parameter being changed (Figure 5B; Figure 5-figure supplement 3). We confirmed that  
9 these relationships were not due to changes in the percentage of seeds germinating (Figure 5). A  
10 positive correlation between effects on CV and mode was observed for parameters controlling all  
11 rates of basal biosynthesis and degradation (Figure 5B; Figure 5-figure supplement 2A; Figure 5-  
12 figure supplement 3A-C) as well as for those controlling the GA-dependent degradation rate of the  
13 Integrator (Figure 5-figure supplement 3D). Positive correlations between effects on CV and mode  
14 were also observed for the sensitivity of ABA production to integrator levels (we define sensitivity as  
15 the inverse of the Integrator threshold for promotion of ABA production and use the equivalent  
16 definition for all subsequent sensitivity parameters; see Figure 5-figure supplement 3E) and for the  
17 sensitivity of integrator production to the ABA level (Figure 5-figure supplement 3F). In some regions  
18 of the parameter space, anti-correlated effects on CV and mode occurred when modulating the  
19 sensitivity of the integrator to GA-promoted degradation (Figure 5C; Figure 5-figure supplement 2B;  
20 Figure 5-figure supplement 3F). In other regions of the parameter space, varying this parameter  
21 caused positively correlated changes in mode and CV with much larger changes in mode than in CV  
22 (Figure 5D; Figure 5-figure supplement 2C). Somewhat decoupled changes in CV and mode were also  
23 observed when varying the parameter that controls the level of noise in the system, such that, for  
24 some regions of parameter space, reductions in noise decreased the CV while maintaining a  
25 relatively constant mode and percentage germination (Figure 5E, Figure 5-figure supplement 2D;

- 1 Figure 5-figure supplement 3G,H). Thus, the model can capture complex relationships between
- 2 different germination traits.

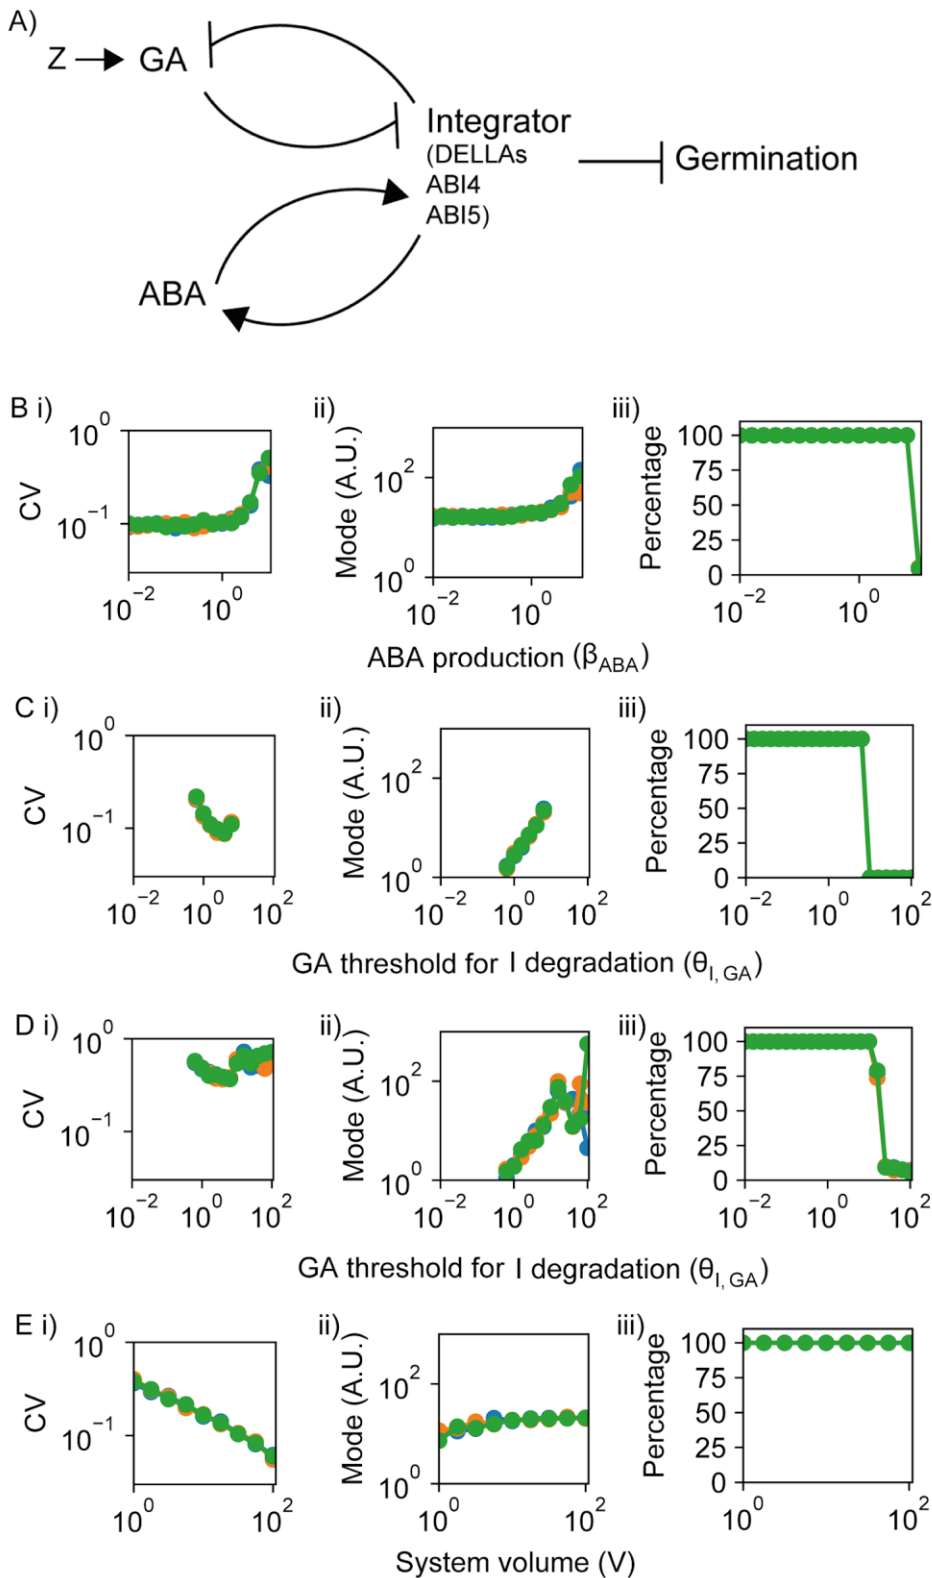

3

- 4 **Figure 5. Model of the ABA-GA bistable switch and effects of its parameters on germination traits.**
- 5 **A)** Model of the ABA-GA network. We represent the inhibitors of germination - DELLAs, ABI4 and

1 ABI5 - as one factor, called Integrator, which we assume must drop below a threshold for  
2 germination to occur. We assume that ABA promotes the production of Integrator, and that GA  
3 promotes its degradation. Integrator is assumed to promote ABA production and inhibit GA  
4 production. A factor, Z, increases upon sowing and promotes GA biosynthesis. **B)-E)** show the effects  
5 on CV, mode and percentage germination of simulated germination time distributions as single  
6 parameter values are changed. Each panel shows the results of three different runs of stochastic  
7 simulations on 400 seeds, represented in different colours. **B)** Varying the rate of ABA production as  
8 an example of a parameter that, when changed, tends to have positively correlated effects on CV  
9 and mode of germination time. **C)** Varying the threshold of GA for degradation of Integrator (this  
10 parameter is inversely correlated with sensitivity of Integrator to GA). For some points in parameter  
11 space, varying this parameter has anti-correlated effects on CV and mode. **D)** As for C, but in a  
12 different region in parameter space (see below for parameter details), in which increasing the  
13 threshold of GA for degradation of Integrator causes an increase in mode with relatively constant  
14 CV. **E)** Varying the effective system volume parameter, V, which controls the level of noise in the  
15 system (noise intensity is proportional to  $1/V$ ), as an example of a parameter that, when changed,  
16 causes decoupled effects on CV and mode. For some areas of parameter space an increase in V, and  
17 therefore a decrease in noise, causes the CV to decrease but leaves mode and percentage  
18 germination relatively unchanged. Parameter values are provided in the methods and were the  
19 same across simulations with the exception of the parameters varied on x axes and differences in  
20  $v_{ABA}$  in B),  $\theta_{i,ABA}$  in C) and E) and V in D). Figure 5-figure supplement 1 provides information on the  
21 dynamics of the model. Figure 5-figure supplement 2 shows simulated germination time  
22 distributions corresponding to the parameter explorations in (B-E). Figure 5-figure supplement 3  
23 shows the full results of the 2D parameter screen in terms of the effects of parameter pairs on CV,  
24 mode and percentage germination.

25

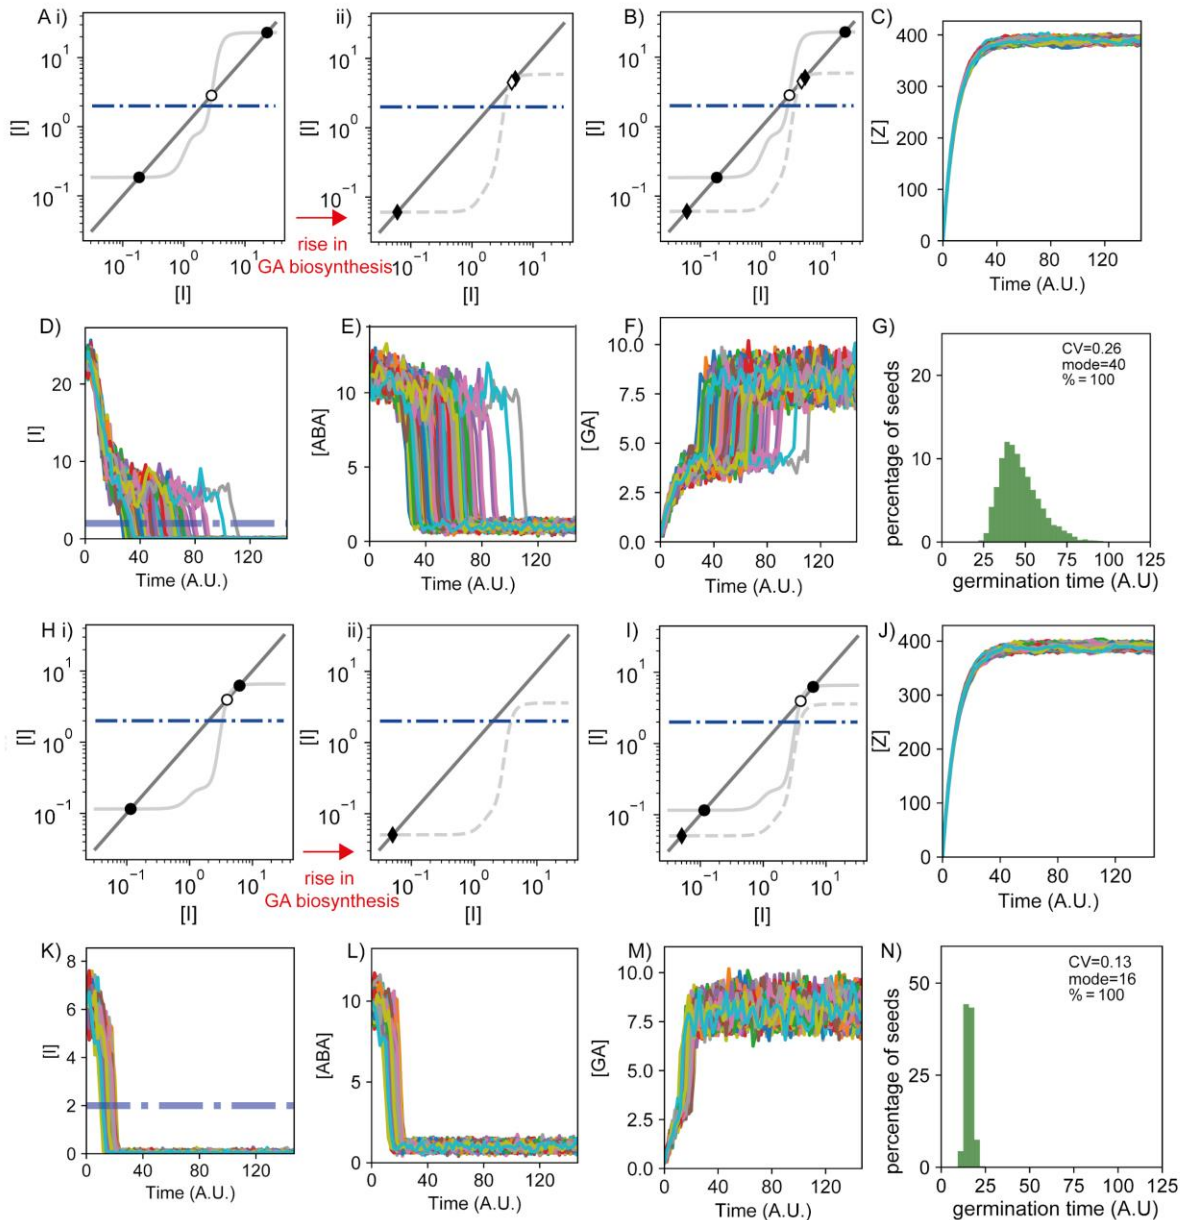

1

2 **Figure 5-figure supplement 1. Dynamics of the components of the ABA-GA model.** Modelling  
3 results showing representative behaviour of the model when it is in the bistable (A-G) and  
4 monostable (J-N) scenarios after the rise of GA biosynthesis (referred to as bistable and monostable  
5 scenarios for simplicity). The bistable scenario corresponds to the grey region in the phase diagrams  
6 shown in Figure 5-figure supplement 3, while the monostable region corresponds to the white  
7 regions. **A, H)** Results from nullcline analysis for the Integrator variable showing the steady states of  
8 the dynamics before (i) and after (ii) the GA biosynthesis increase (see methods). In each panel,  
9 steady state solutions are shown by the intersections between the dark gray line and the light gray  
10 line. Filled dots and diamonds represent the Integrator stable steady states before and after the GA  
11 biosynthesis increase, respectively. Empty dots and diamonds represent unstable steady states. The  
12 dashed-dotted blue line illustrates the Integrator threshold below which germination happens.  
13 Before the increase of GA biosynthesis, the modelled network exhibits a high Integrator stable  
14 steady state above the threshold (higher filled dot), representing a non-germinating state before  
15 sowing. We set this state as the initial condition of the simulation. For these parameter values, a  
16 lower Integrator stable solution below the germination threshold exists (lower filled dot), therefore  
17 representing a germination state, as well as an intermediate unstable Integrator solution (empty

1 dot). Hence, bistability occurs for the Integrator variable before the increase of GA biosynthesis.  
2 With the provided noise intensity for these simulations, none of the seeds is able to switch from the  
3 non-germination state to the germination state in scenario (A), and a low percentage of seeds is able  
4 to switch in scenario (H) (see methods). A ii) In the bistable scenario after the rise in GA biosynthesis,  
5 the non-germination state (high Integrator, high ABA and low GA) approaches the unstable steady  
6 state (empty dot), becoming less stable. In this case, stochastic fluctuations enable the simulated  
7 seeds to cross the unstable steady state, reaching the germination state (low Integrator, low ABA  
8 and high GA), which becomes a more stable solution. H ii) In the monostable scenario after the rise  
9 in GA biosynthesis, the increase in GA biosynthesis has a more dramatic effect, leading the non-  
10 germination state and the unstable steady state to disappear through a saddle node bifurcation; this  
11 makes the germination state the only possible stable state. **B, I**) Nullclines analyses shown in (A) and  
12 (H) subpanels, represented together. For each panel, the light grey solid line and dots show the case  
13 before the rise in GA biosynthesis and the light grey dashed line and diamonds show the case after  
14 the rise in GA biosynthesis. **C)-F)** and **J)-M)** Time courses for the components of the model in  
15 example simulations. Different coloured lines represent different seeds. **C, J)** Time courses of the  
16 concentration of the factor Z, which increases rapidly upon sowing and promotes GA biosynthesis. **D,**  
17 **K)** Time courses of Integrator concentrations. Dashed-dotted blue lines show the threshold below  
18 which Integrator must drop for germination to occur. **E, L)** Time courses of ABA concentrations. **F, M)**  
19 Time courses of GA concentrations. **G, N)** Histograms of germination times, with values for CV, mode  
20 and percentage germination for the distribution. The simulation representing the bistable scenario  
21 shows a transient in which the seeds can remain in a high Integrator state until the stochastic  
22 fluctuations cause them to switch to the low Integrator state. Conversely, in the monostable  
23 scenario, the seeds achieve the low Integrator state in a more direct manner. Parameter values for  
24 (A-G) and (H-N) are the same with the exception of the Integrator degradation ( $\beta_i=0.4$  in (A-G) and  
25  $\beta_i=1.4$  in (H-N)). See methods for further details on parameters and numerical simulations.

26



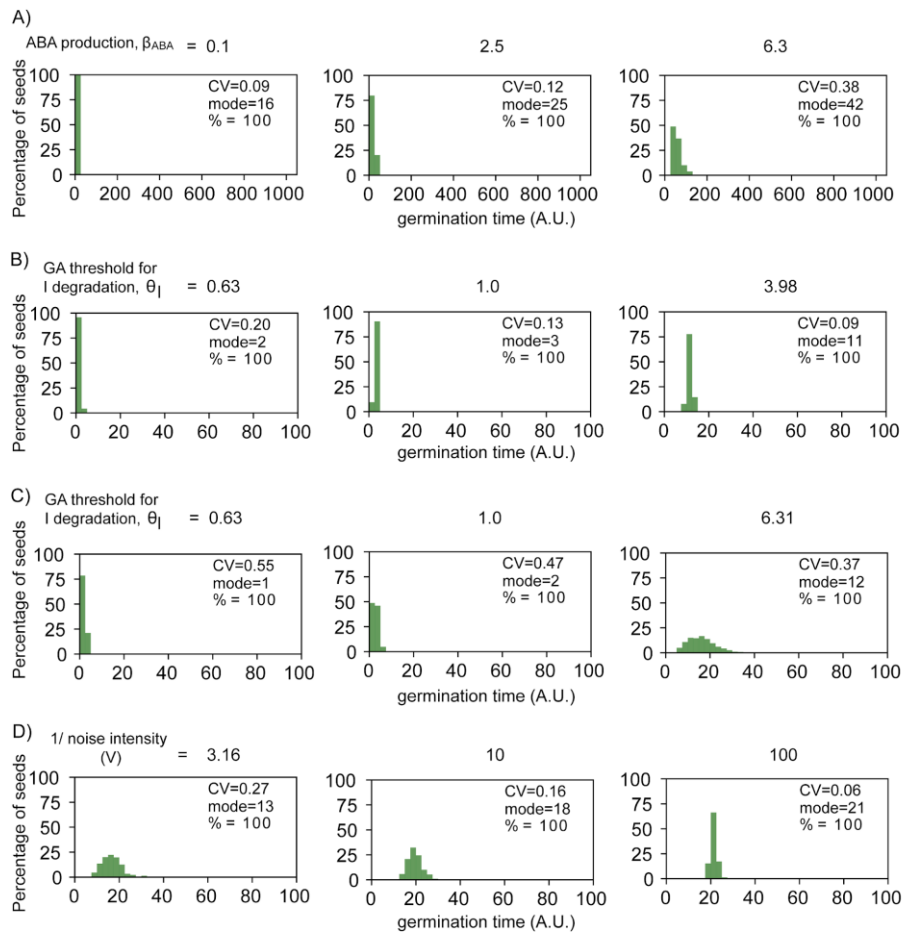

1

2 **Figure 5-figure supplement 2. Simulated germination time distributions illustrating the effects of**  
3 **parameter value changes.** All histograms correspond to points in the plots in Figure 5. **A)** Simulated  
4 germination time distributions for three values of basal ABA production, showing positively  
5 correlated changes in CV and mode. Data correspond to those in Figure 5B. **B)** As for A, but varying  
6 the GA threshold for Integrator degradation (which is inversely proportional to Integrator sensitivity  
7 to GA), illustrating anti-correlated changes in mode and CV. In these simulations, the ABA threshold  
8 for integrator production is set to 10. Data correspond to those in Figure 5C. **C)** As for B but varying  
9 the GA threshold for Integrator degradation in an area of parameter space where the mode  
10 increases while the CV remains relatively constant. In these simulations, the ABA threshold for  
11 integrator production is set to 6.5. Data correspond to those in Figure 5D. **D)** Varying the parameter  
12  $V$  which governs the level of noise in the system, illustrating a change in CV while the mode remains  
13 relatively constant. Data correspond to those in Figure 5E.

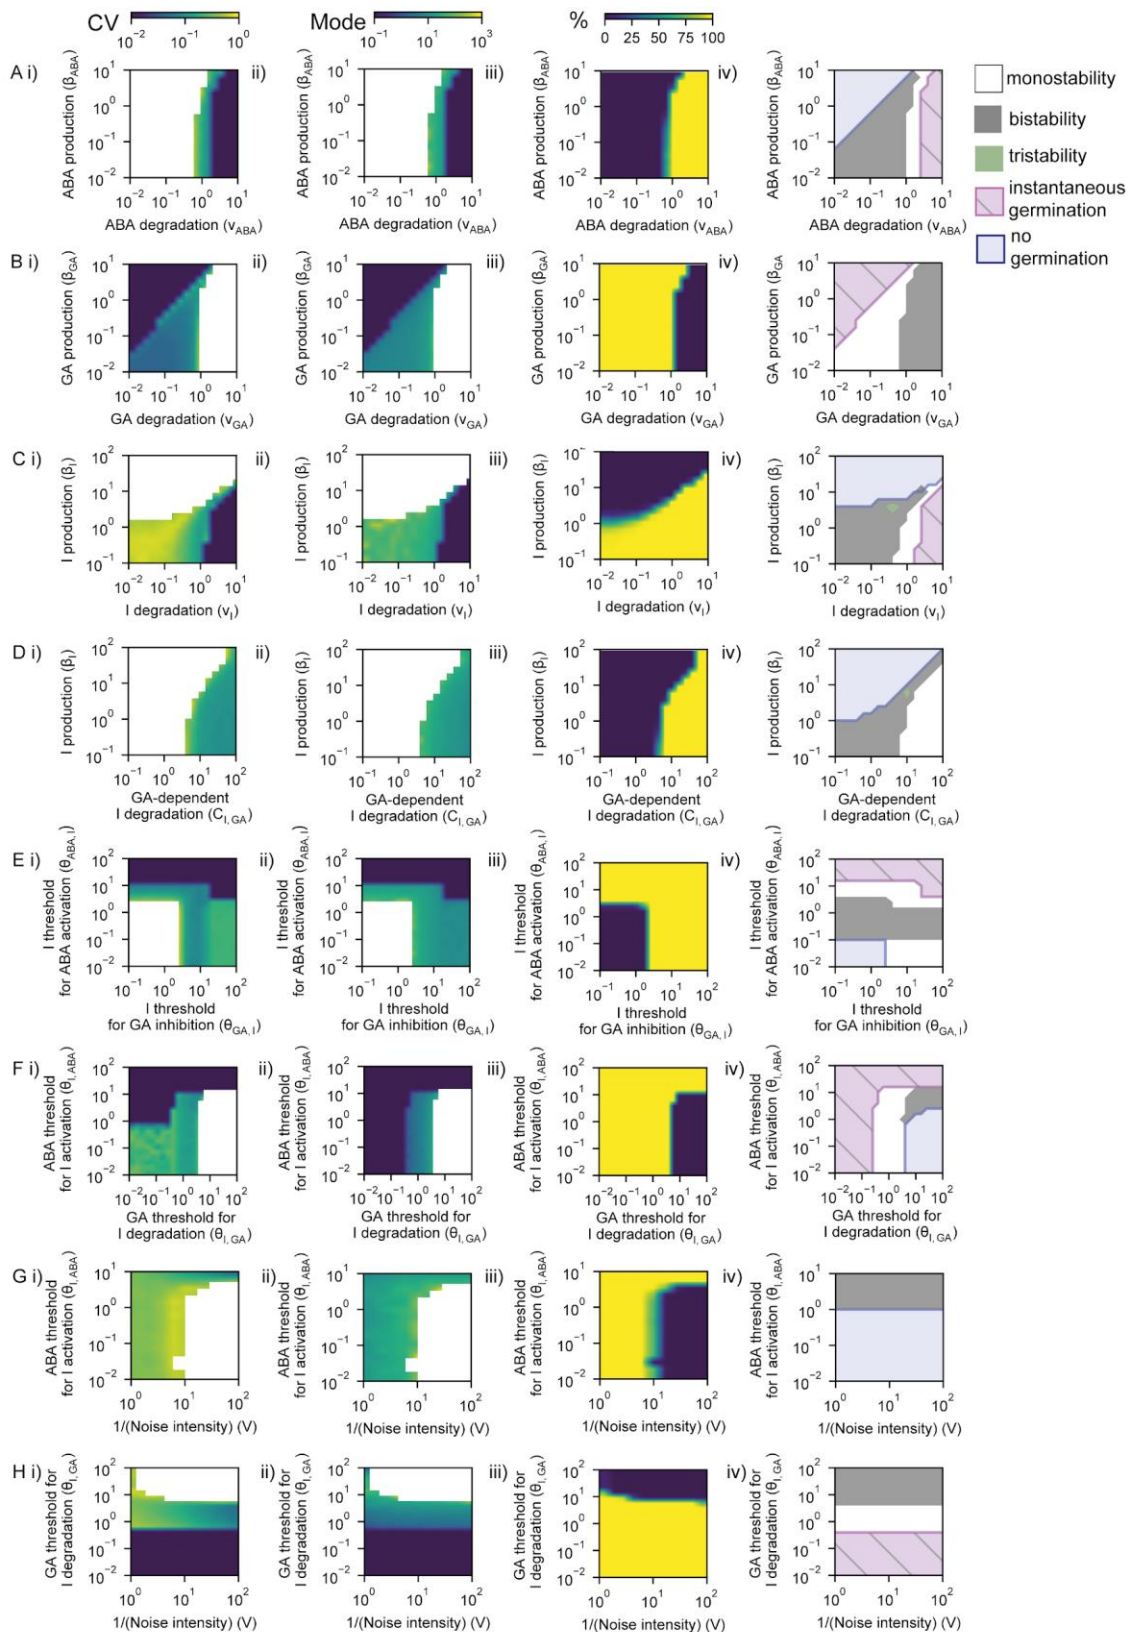

1

2 **Figure 5-figure supplement 3. Exploring the effects of model parameters on CV, mode and**  
 3 **percentage germination.** Each panel shows a result from a 2D parameter exploration for a pair of  
 4 parameters, such that each parameter is varied for a range of values of a second parameter. **A)**  
 5 Effect of basal ABA production and basal ABA degradation parameters on CV (i), mode (ii) and  
 6 percentage germination (%) (iii) of simulated germination distributions. CVs below 0.01 and above 1

1 are represented as being 0.01 and 1, respectively. CV and mode of the simulations were represented  
2 when there were more than nine seeds germinating out of 1000. iv) Phase diagram showing  
3 theoretically predicted regions from nullcline analysis of the deterministic system: bistability (grey)  
4 and tristability (green) regions in which we can expect the full range of behaviours in terms of  
5 germination, region where we expect to have all seeds germinated instantaneously (pink hatched),  
6 and region where no seeds are expected to germinate in the deterministic limit (no noise) (blue).  
7 The remaining white region is monostable and we expect all seeds (non-instantaneously) to  
8 germinate (see Figure 5-figure supplement 1 for information on this region). We expect that just the  
9 bistable and the tristable scenarios will allow a percentage of seeds to germinate that differs from 0  
10 and 100%. The colour bars above A apply to all rows. All rows are as for A, but exploring the  
11 following parameter pairs: **B**) GA basal degradation *versus* GA basal production; **C**) Integrator basal  
12 degradation *versus* Integrator basal production; **D**) GA-dependent degradation of Integrator *versus*  
13 Integrator basal production; **E**) Threshold of Integrator for the inhibition of GA production (which is  
14 inversely correlated with sensitivity of GA to Integrator) *versus* threshold of Integrator for the  
15 promotion of ABA production (which is inversely correlated with sensitivity of ABA to Integrator); **F**)  
16 Threshold of GA for the GA-mediated degradation of Integrator (which is inversely correlated with  
17 sensitivity of Integrator to GA) *versus* threshold of ABA for the promotion of Integrator production  
18 (which is inversely correlated with sensitivity of Integrator to ABA); **G**) Effective volume of the  
19 system,  $V$  (which is inversely proportional to the noise in the system, see methods) *versus* threshold  
20 of ABA for the promotion of Integrator production; **H**) Effective volume of the system,  $V$ , *versus*  
21 threshold of GA for the degradation of Integrator. The theoretically predicted areas from nullclines  
22 (right panels) are closely predictive of the stochastic simulation outcomes (see methods). Figure 5-  
23 figure supplement 4 and Figure 5-figure supplement 5 show an analysis of the CV and mode of  
24 germination times in monostable and bistable regions of these parameter spaces. See methods for  
25 further details of the simulations and theoretical predictions and for full parameter values for each  
26 simulation.  
27

28 These parameter screens also showed that across a range of parameter sets, both modes and CVs of  
29 germination times tend to be higher when bistability occurs after the rise in GA biosynthesis (Figure  
30 5-figure supplement 3, Figure 5-figure supplement 4 and Figure 5-figure supplement 5). Additionally,  
31 the bistability region is associated with increased variability in the modal germination time between  
32 simulations (Figure 5-figure supplement 4).

33

34

35

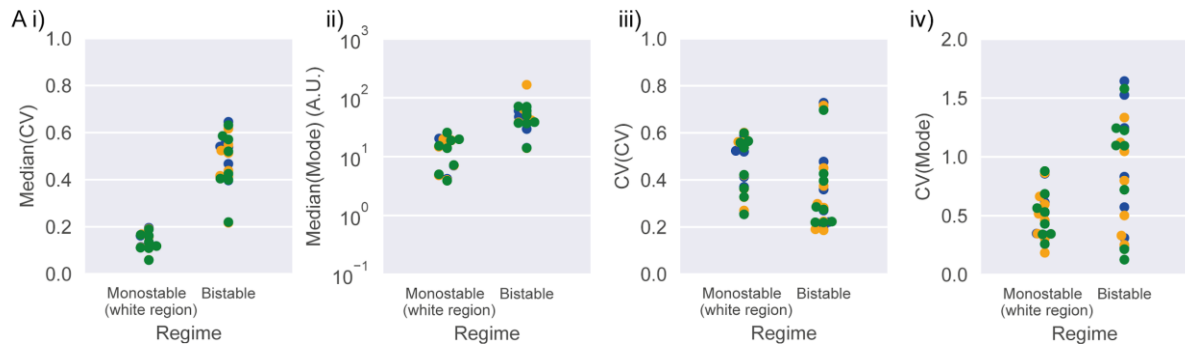

1

2 **Figure 5-figure supplement 4. Statistics of mode and CV of germination times in bistable and**  
3 **monostable regions of the model after the rise in GA biosynthesis.** The statistical analysis is  
4 performed on the datasets shown in Figure 5-figure supplement 5. In i) and ii) each data point is the  
5 median CV or median mode germination time, where the median is calculated across the results for  
6 a given 2D parameter screen. In iii) and iv) each data point is the CV of the CV or the CV of the mode  
7 of germination time where the CV is calculated across the results for a given 2D parameter screen.  
8 Data points falling within the instantaneous and non germination predicted regions (see Figure 5-  
9 figure supplement 3 for details of regions) were not included in this analysis because we consider  
10 them to be less biologically relevant (see methods). Colours represent different runs of stochastic  
11 simulations.

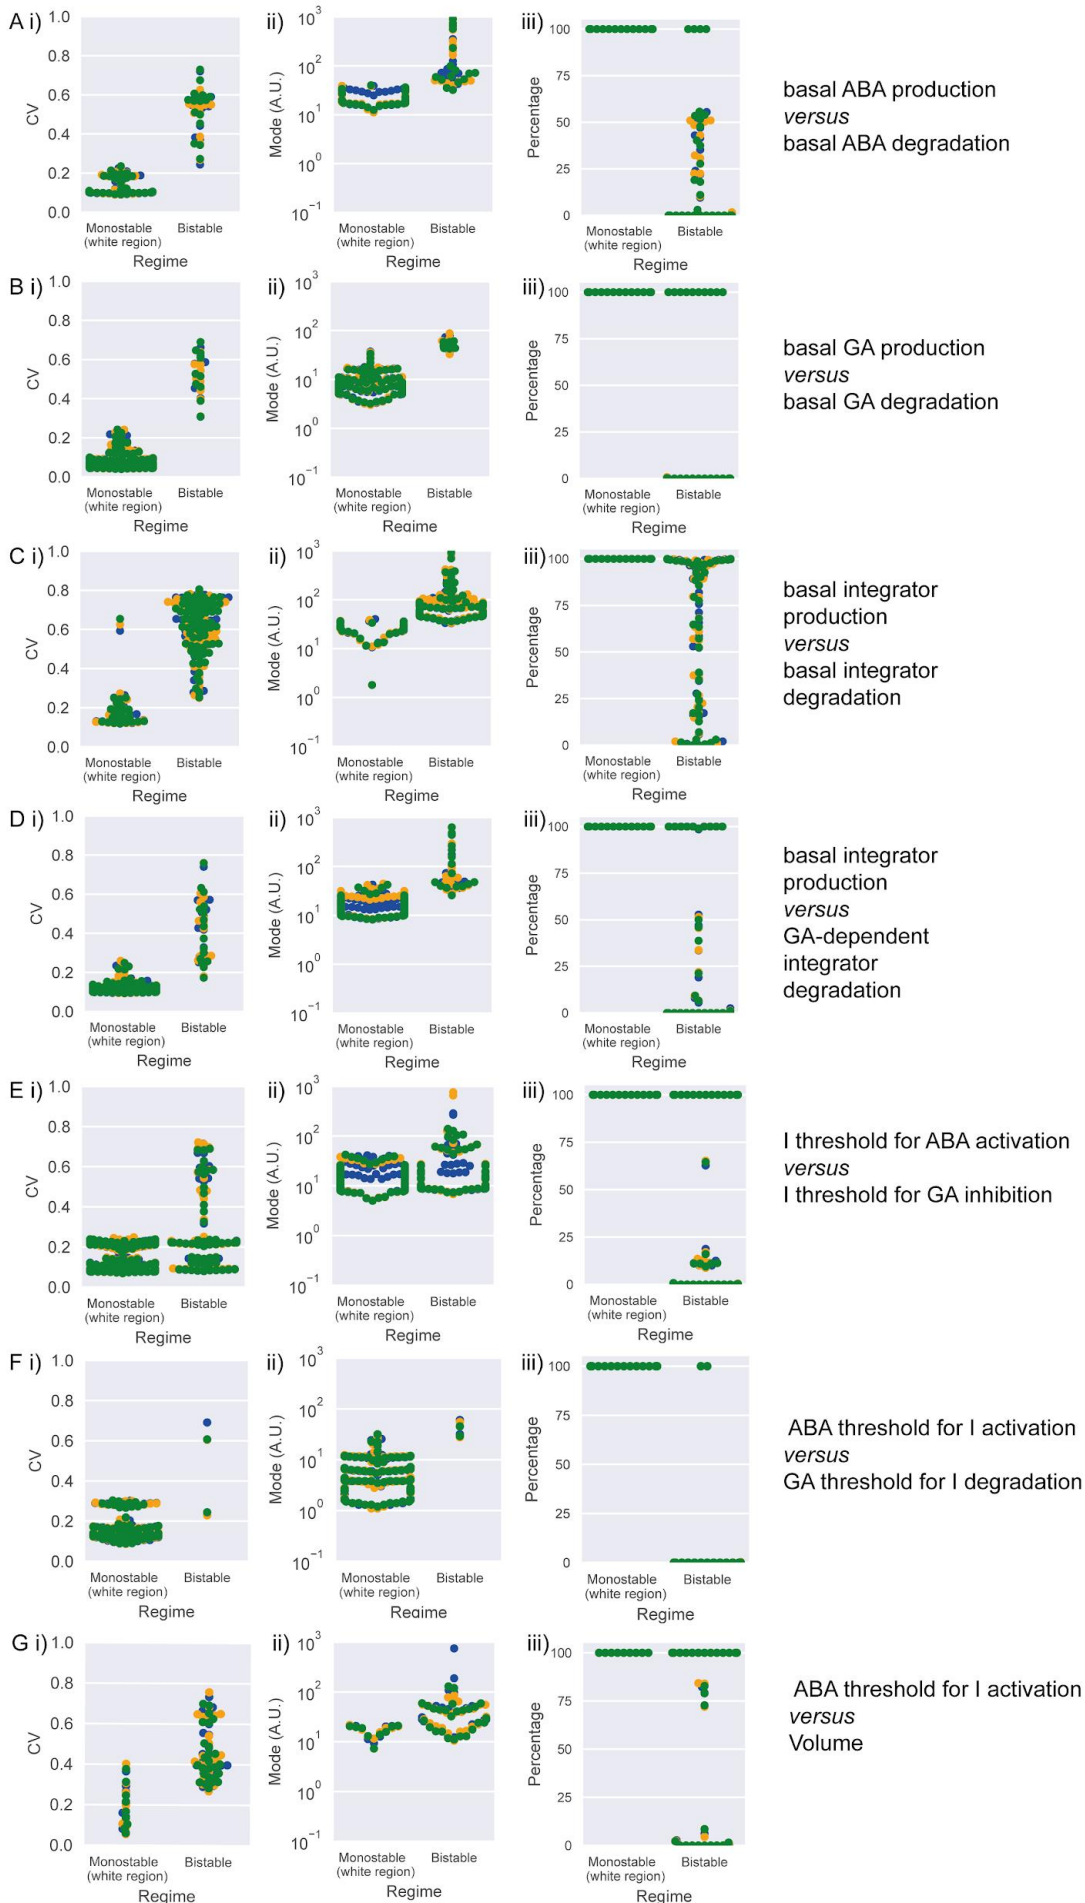

1 **Figure 5-figure supplement 5. CV and mode of germination times and percentage germination in**  
2 **bistable and monostable regions of the model after the rise in GA biosynthesis.** Simulation results  
3 across the different 2D parameter explorations shown in Figure 5-figure supplement 3. Points  
4 represent simulation results for different combinations of parameter values for the parameter pair  
5 indicated on the right. Colours represent different runs of stochastic simulations. Data points falling  
6 within the instantaneous and non germination predicted regions (see Figure 5-figure supplement 3  
7 for details of regions) were not included in this analysis because we consider them to be less  
8 biologically relevant (see methods).

9  
10

11 To generate testable predictions, we next sought to understand how the model behaves when the  
12 levels of ABA and GA are varied through exogenous addition. The model predicts that starting from  
13 germination distributions with low or high variability, increasing concentrations of exogenous ABA  
14 will initially increase the CV of germination time distributions (Figure 6A i), causing a long-tailed  
15 distribution of germination times to emerge (Figure 6-figure supplement 1A). This is because the  
16 addition of exogenous ABA stabilises the Low GA - High ABA - High Integrator state, requiring  
17 stronger fluctuations to allow germination (Figure 6-figure supplement 2A). At higher concentrations  
18 of ABA the germination time distribution becomes flattened into a seemingly uniform distribution  
19 with a high mode and mean and therefore lower CV (Figure 6A i, iii; Figure 6-figure supplement 1A,  
20  $[ABA_{exo}] = 2.5$ ). At high enough levels of exogenous ABA, the time to achieve the low integrator state  
21 becomes larger than our chosen final simulation time; seeds exhibiting this behaviour are considered  
22 non-germinating. Hence, the increase of exogenous ABA also reduces the percentage of germinated  
23 seeds (Figure 6A iv). In these cases the high exogenous ABA makes the system become monostable,  
24 causing the non-germination solution to be the only one.

25

26 Conversely, addition of GA can destabilise and even destroy the Low GA - High ABA - High Integrator  
27 state (Figure 6-figure supplement 2B), readily enabling a decrease of the Integrator, and leading to a  
28 reduced mode and less variable germination times (Figure 6B i, iii; Figure 6-figure supplement 1B).

29

30

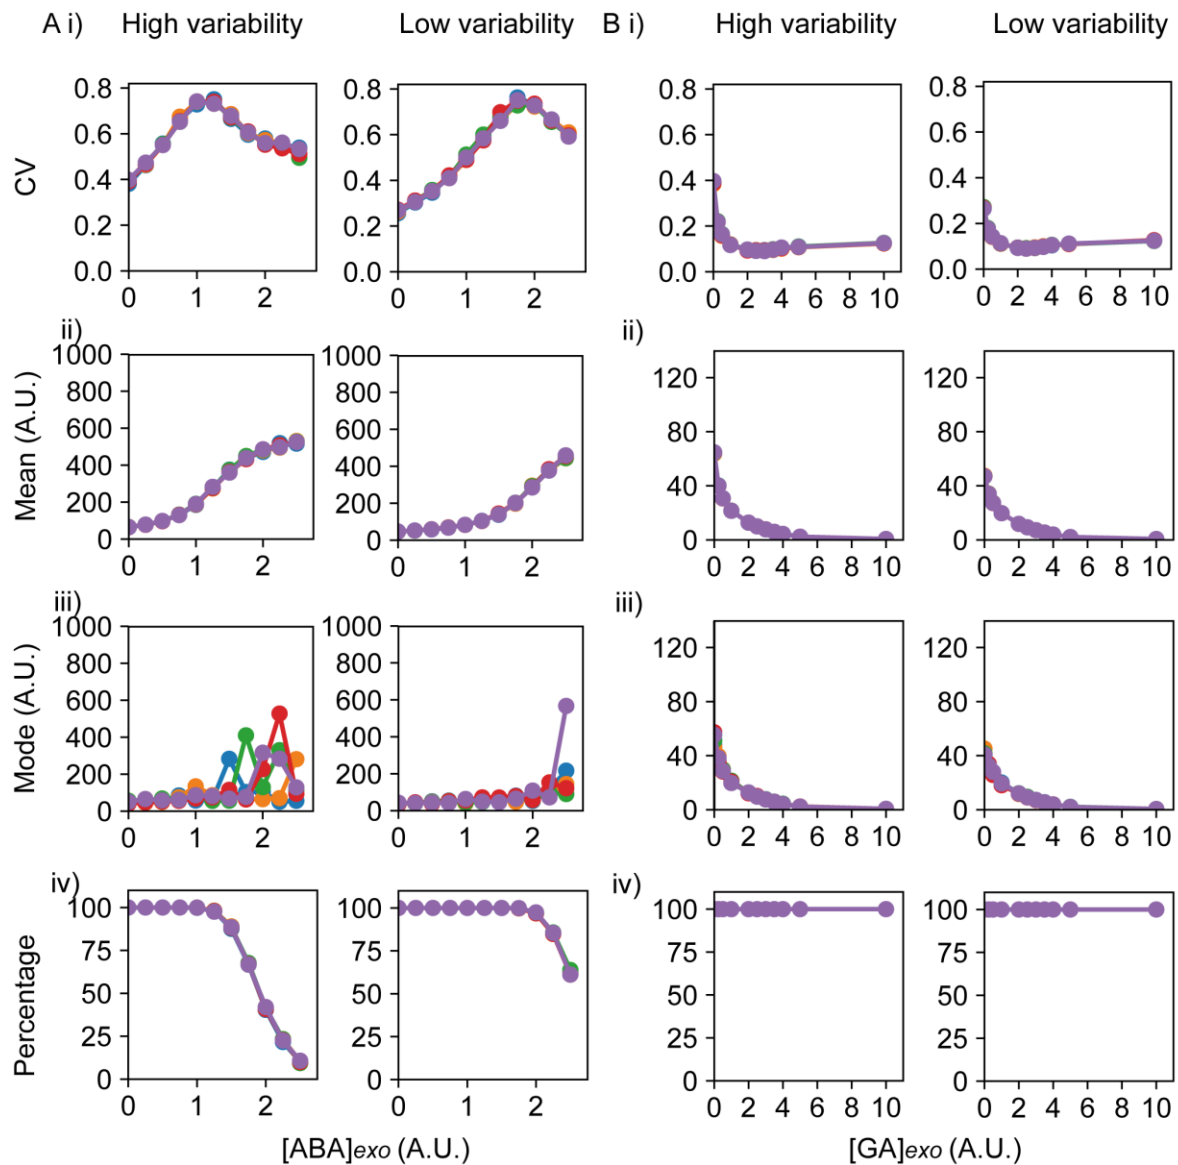

1

2 **Figure 6. Predictions of the ABA-GA model on the effects of exogenous addition of ABA and GA. A)**  
 3 Simulations of addition of increasing doses of exogenous ABA (x axes), starting from a point in the  
 4 parameter space that shows higher seed germination time variability (left) and lower variability  
 5 (right) when no exogenous ABA or GA is added. Plots show the effects on the CV (i), mean (ii), mode  
 6 (iii) and percentage of seeds that germinated (iv) for the resulting germination time distributions. For  
 7 the ABA dose response, we chose concentrations of ABA for which there was at least 10 %  
 8 germination on average for the high variability lines, to allow the other germination parameters to  
 9 be ascertained. **B)** As for A, but for the addition of increasing concentrations of exogenous GA (x  
 10 axes). Each panel shows the result of 5 stochastic simulations for 4000 seeds, each plotted in a  
 11 different colour. Parameter values for the high and low variability lines simulations are the same  
 12 with the exception of the threshold for GA degradation ( $\theta_{i,GA}=6$  for the low variability lines and  
 13  $\theta_{i,GA}=6.2$  for the high variability lines), and the applied hormones, which are also treated as  
 14 parameters. See methods for further simulation details and parameter values. Figure 6-figure  
 15 supplement 1 shows simulated germination time distributions for specific values for selected  
 16 concentrations of  $ABA_{exo}$  and  $GA_{exo}$ . Figure 6-figure supplement 2 shows the results of nullcline  
 17 analysis in the presence of  $ABA_{exo}$  and  $GA_{exo}$ .

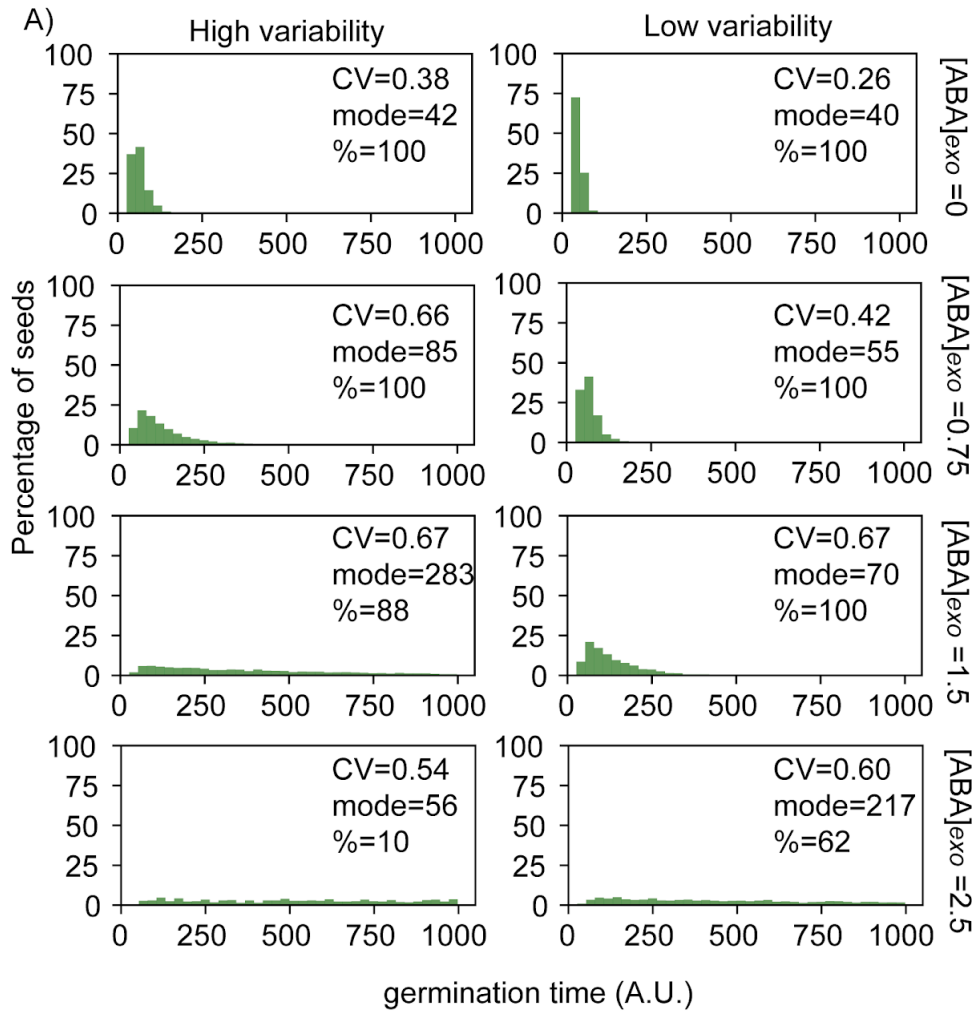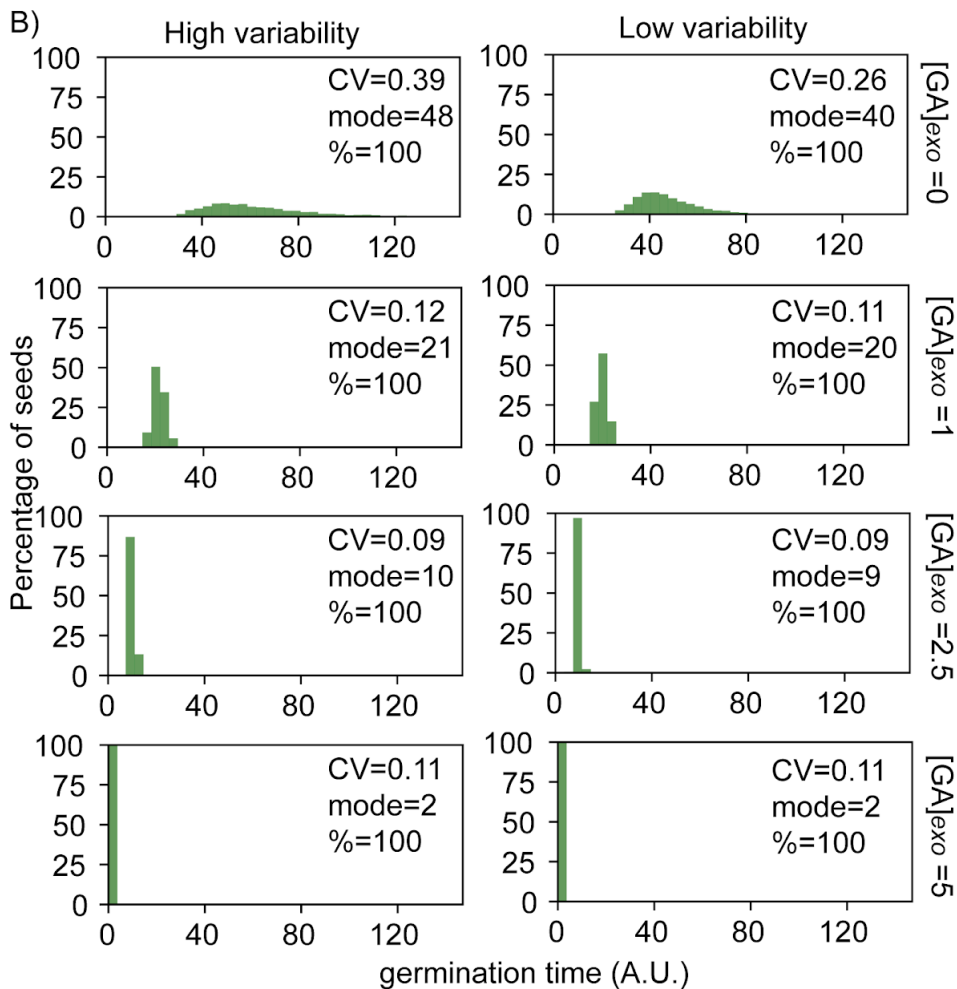



1 **Figure 6-figure supplement 1. Simulated germination time distributions for a range of**  
2 **concentrations of exogenous ABA and GA.** Simulation results of adding increasing concentrations of  
3 exogenous ABA (A) or GA (B), showing germination time distributions and the CV, mode and  
4 percentage germination for those distributions. Simulations were performed starting from a point in  
5 the parameter space that shows higher germination time variability (left) and lower germination  
6 time variability (right) when no exogenous ABA or GA is added. Results correspond to a subset of the  
7 same simulations as those presented in Figure 6. See corresponding nullclines for some of these  
8 panels in Figure 6-figure supplement 2.  
9  
10

A) ABA dose response, low variability parameter set

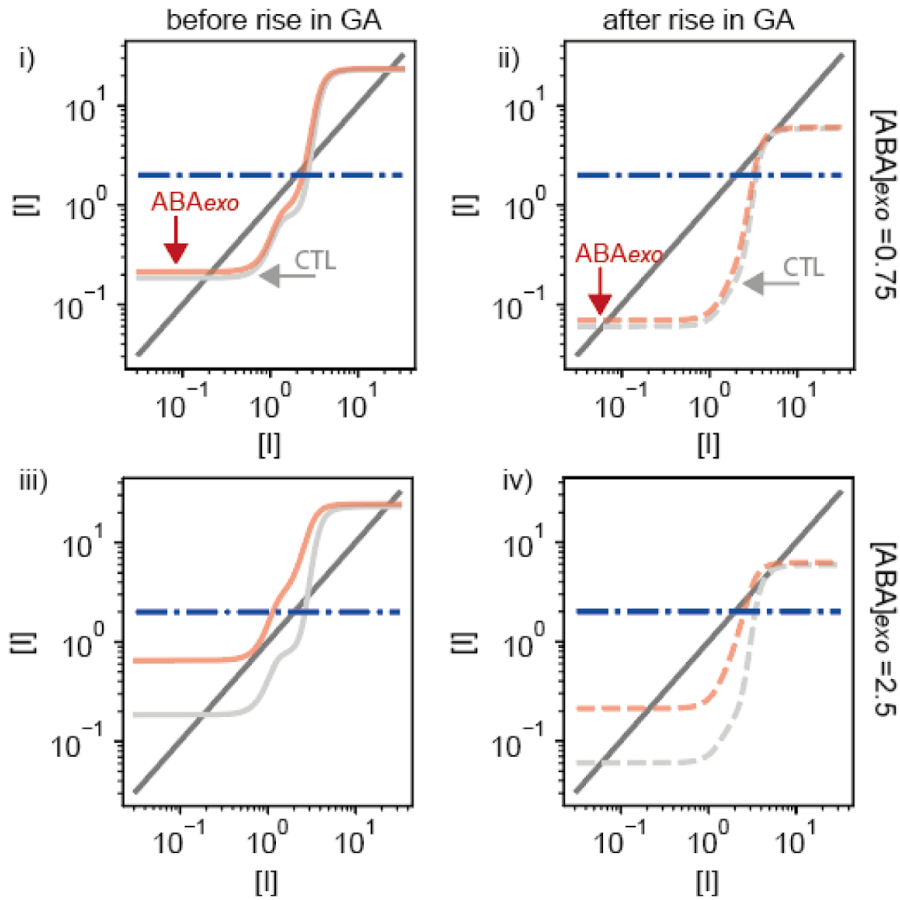

B) GA dose response, high variability parameter set

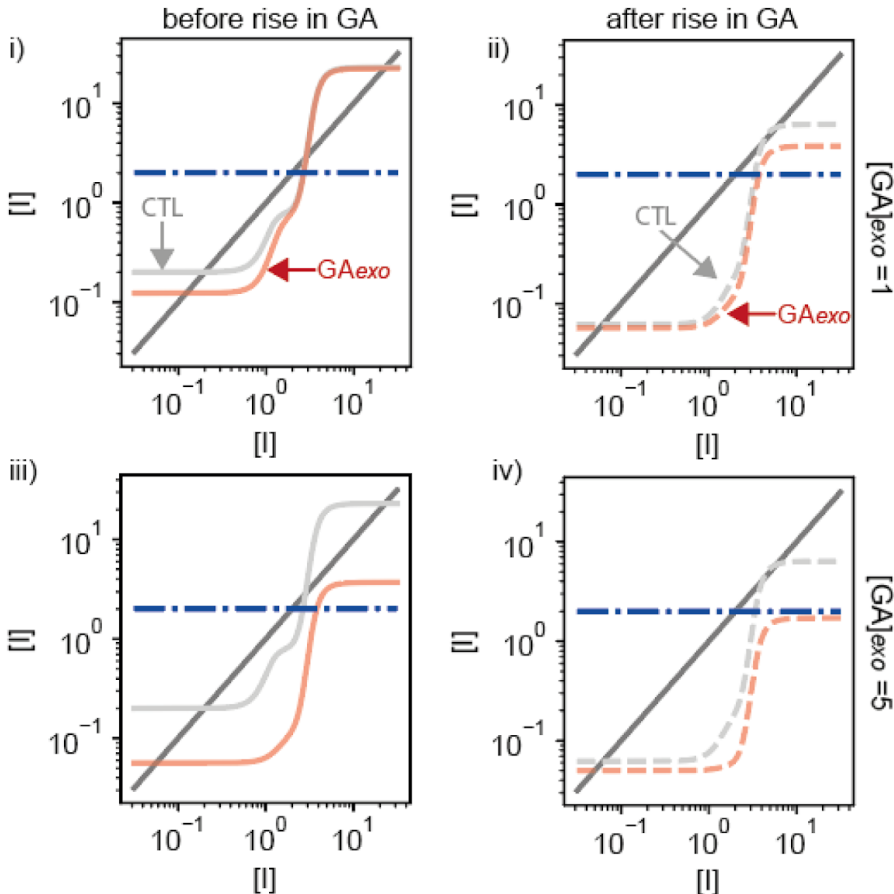

1 **Figure 6-figure supplement 2. Results of nullcline analysis for ABA and GA dose responses.** Plots  
2 are for example cases from Figure 6 and Figure 6-figure supplement 1. **A)** Examples of nullcline  
3 analyses for two doses of exogenous ABA applied to the low variability parameter set. Left-hand  
4 panels (i and iii) show the cases at the beginning of the simulations, prior to the rise in basal GA  
5 biosynthesis. Right hand panels (ii and iv) show plots for after the rise in basal GA biosynthesis. Light  
6 grey solid (i and iii) and dashed (ii and iv) lines show the control simulations without exogenous  
7 addition of ABA and red solid (i and iii) and dashed (ii and iv) lines show the simulations with  
8 addition of exogenous ABA (the level added is indicated on the right). Steady state solutions are  
9 shown by the intersections of the dark gray solid line with the light grey or red lines. Dashed blue  
10 line is the threshold below which Integrator must drop for germination to occur. Exogenous  
11 application of ABA (iv) can enhance the stability of the non-germination state (see methods), making  
12 it more difficult to switch to the germination state, driving a very long-tailed distribution of  
13 germination times (Figure 6-figure supplement 1A). Exogenous ABA also shifts the Low Integrator  
14 steady state higher, closer to the threshold for germination (compare red and grey lines). **B)** As for A,  
15 but for the addition of exogenous GA to the high variability parameter set. Exogenous application of  
16 GA can destroy bistability before and after the rise of GA biosynthesis, making the germination  
17 steady state the only possible steady state. This allows seeds to germinate earlier, with less  
18 variability (Figure 6-figure supplement 1B).

19

## 20 **Exogenous GA and ABA addition validates the model predictions**

21 We next sought to test the model predictions that increasing ABA tends to increase variability in  
22 germination time, while GA decreases it. To do this we treated a number of lines with high or low  
23 variability in germination times with a range of ABA and GA doses and quantified germination at 1  
24 day intervals.

25 ABA treatments tended to increase the spread of germination time distributions, particularly for low  
26 variability lines. In the low variability lines, high ABA concentrations of 5 and 10  $\mu\text{M}$  caused large  
27 increases in the CV of germination time, such that the distributions of germination times for low  
28 variability lines treated with ABA were similar to those of high variability lines in control conditions  
29 (Figure 7A i, Figure 7-figure supplement 1A, compare Col-0 10  $\mu\text{M}$  ABA with M182, 0  $\mu\text{M}$  ABA). This  
30 was consistent with the prediction from the model that an initial increase in ABA concentration  
31 causes an increase in CV (Figure 6A i, Figure 6-figure supplement 1A). At 5  $\mu\text{M}$  ABA, the increase in  
32 CV occurred with only a slight increase in mode and little change in percentage germination,  
33 whereas at 10  $\mu\text{M}$  there was a corresponding increase in mode days to germination and decrease in  
34 percentage germination (Figure 7A). This observation that moderate ABA levels cause a larger  
35 increase in CV compared with the change in the mode was consistent with the model (Figure 6A i, iii;

1 Figure 6-figure supplement 1A, ABA<sub>exo</sub> 0 compared to ABA<sub>exo</sub> 1.5 (CV fold change =2.6; mode fold  
2 change=1.75)). For high variability lines, increasing concentrations of ABA increased mean and mode  
3 germination times, but had relatively little effect on variability (Figure 7A i, ii and iii, Figure 7-figure  
4 supplement 1A, 182). While the model did predict changes in CV for high variability lines, the fold-  
5 changes were smaller than those predicted for low variability lines (Figure 6A i).

6

7 As predicted by the model, GA tended to decrease the level of variability in germination time, with  
8 the effect strongest for the high variability genotypes (Figure 7Bi). For high variability lines,  
9 increasing concentrations of GA tended to decrease the CV of germination time, making germination  
10 more uniform (Figure 7B, H panels; Figure 7-figure supplement 1B, 182). As expected from previous  
11 studies (Ni and Bradford 1993; Bewley 1997; Koornneef and Karssen 1994) high GA addition also  
12 increased germination percentages and decreased the mean germination time in high variability  
13 lines (Figure 7B). For low variability lines, GA had little effect on the variability (CV), percentage  
14 germination, mean or mode germination times (Figure 7B, L panels; Figure 7-figure supplement 1B,  
15 Col-0) as these lines germinated in a uniform manner with high percentage germination even in the  
16 absence of GA.

17 Thus, for both ABA and GA, the overall effects of exogenous addition were qualitatively similar  
18 between the model and experiments.

19

20

21

22

23

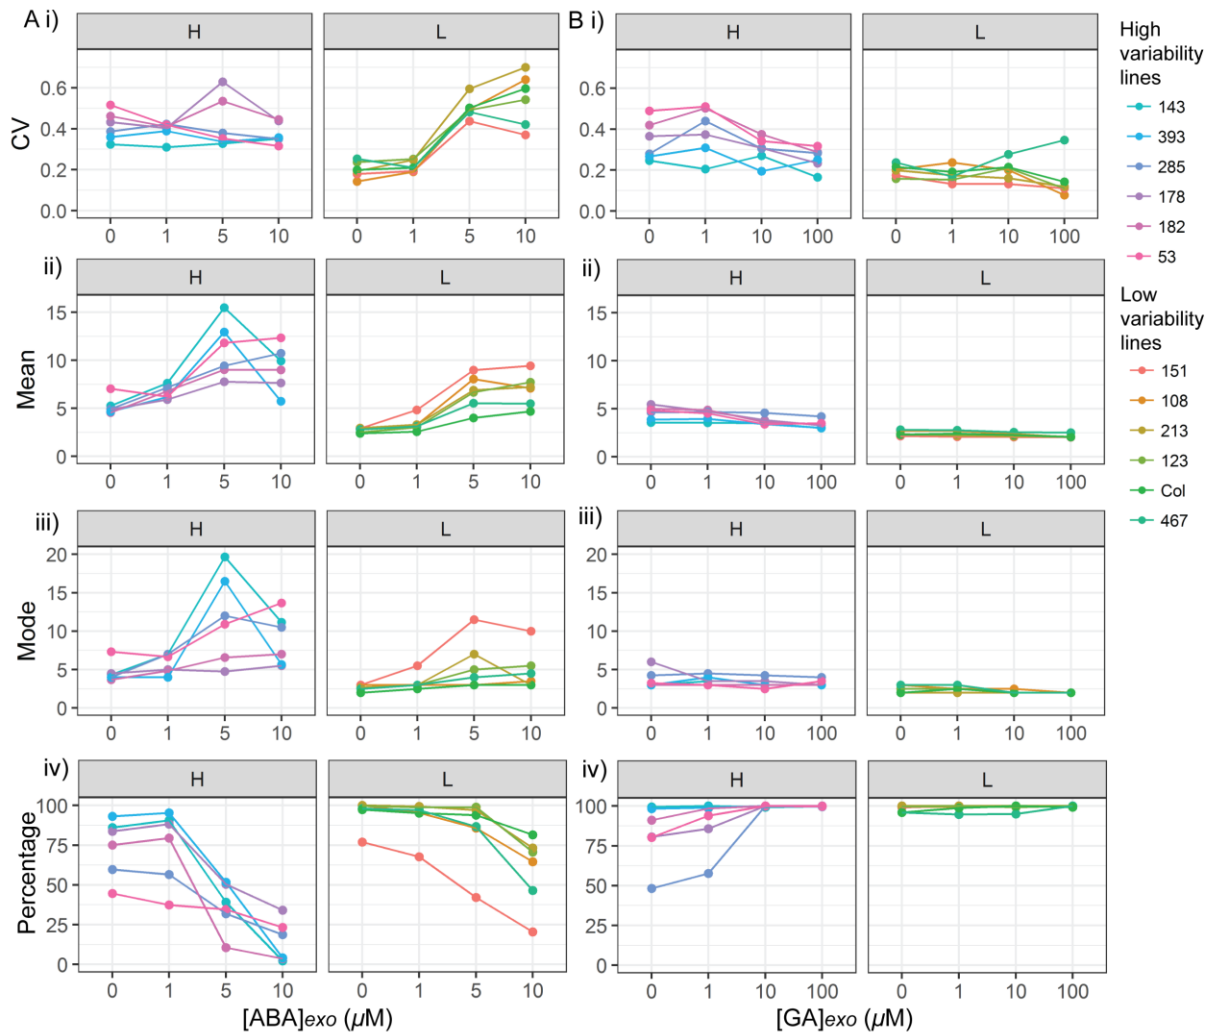

1  
2 **Figure 7. ABA and GA dose responses of high and low variability lines.** A) ABA and B) GA dose  
3 responses for 6 high variability MAGIC lines (panels labelled “H”) and 6 low variability lines (5 MAGIC  
4 lines plus Col-0) (panels labelled “L”). A i) and B i) show mean CVs of individual lines for different  
5 ABA/GA concentrations (means are of at least 2 independent experiments, except for MAGIC lines  
6 467 and 151 which have only one replicate in the GA dose response experiment), ii) mean days to  
7 germination, iii) mode days to germination, iv) percentage germination. Treatments with “0”  $\mu\text{M}$  are  
8 vehicle control treatments. Figure 7-figure supplement 1 shows effects of ABA and GA on  
9 germination time distributions for example high and low variability lines.

10  
11

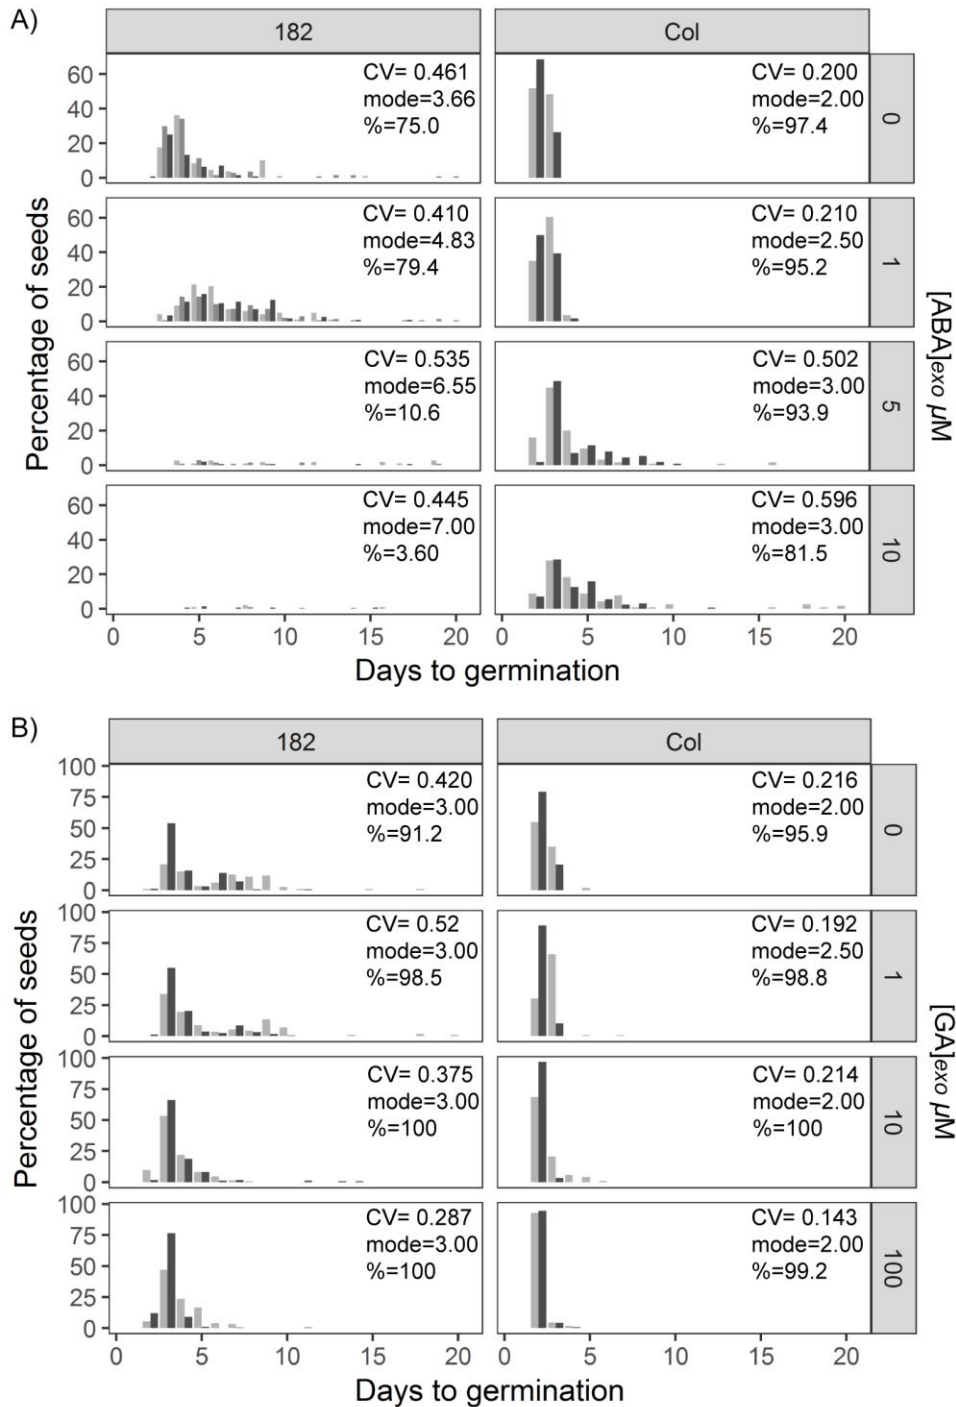

1  
2  
3  
4  
5  
6  
7  
8  
9  
10  
11

**Figure 7-figure supplement 1. Effects of ABA and GA on germination time distributions for example high and low variability lines. A)** Effect of increasing ABA concentration on the distribution of germination times for the high variability MAGIC line, M182 (left panels), and the low variability accession, Col-0 (right panels). Plots show the percentage of all seeds that were sown, that germinated on a given day. Horizontal rows of panels show increasing concentrations of ABA (see labels on right). Shades of grey indicate experimental replicates (at least two for each genotype). **B)** As for A, but for GA.

1 We also sought to investigate the effects of altered levels of ABA or GA on germination time  
2 distributions using a genetic approach. To test the effect of increased ABA concentration in the low  
3 variability background of the Col-0 accession, we used the *cyp707a1* and *cyp707a1 cyp707a2*  
4 mutants, which lack enzymes required for ABA catabolism (Kushiro et al., 2004; Okamoto et al.,  
5 2006). Similar to the effect of exogenous addition of ABA on low variability lines, loss of function of  
6 the *CYP707A1* enzyme caused the Col-0 germination time distribution to become long-tailed, this  
7 occurred without causing a large shift in the mode days to germination (Figure 8). Loss of both  
8 enzymes severely inhibited germination time and caused a large increase in the mode days to  
9 germination, similar to the effect of higher concentrations of exogenous ABA (Figure 8). This  
10 correlated effect of a change in the ABA degradation rate on CV, mode and percentage germination  
11 is consistent with the results from changing the ABA degradation parameter in the model (Figure 5-  
12 figure supplement 3A i-iii).

13

14

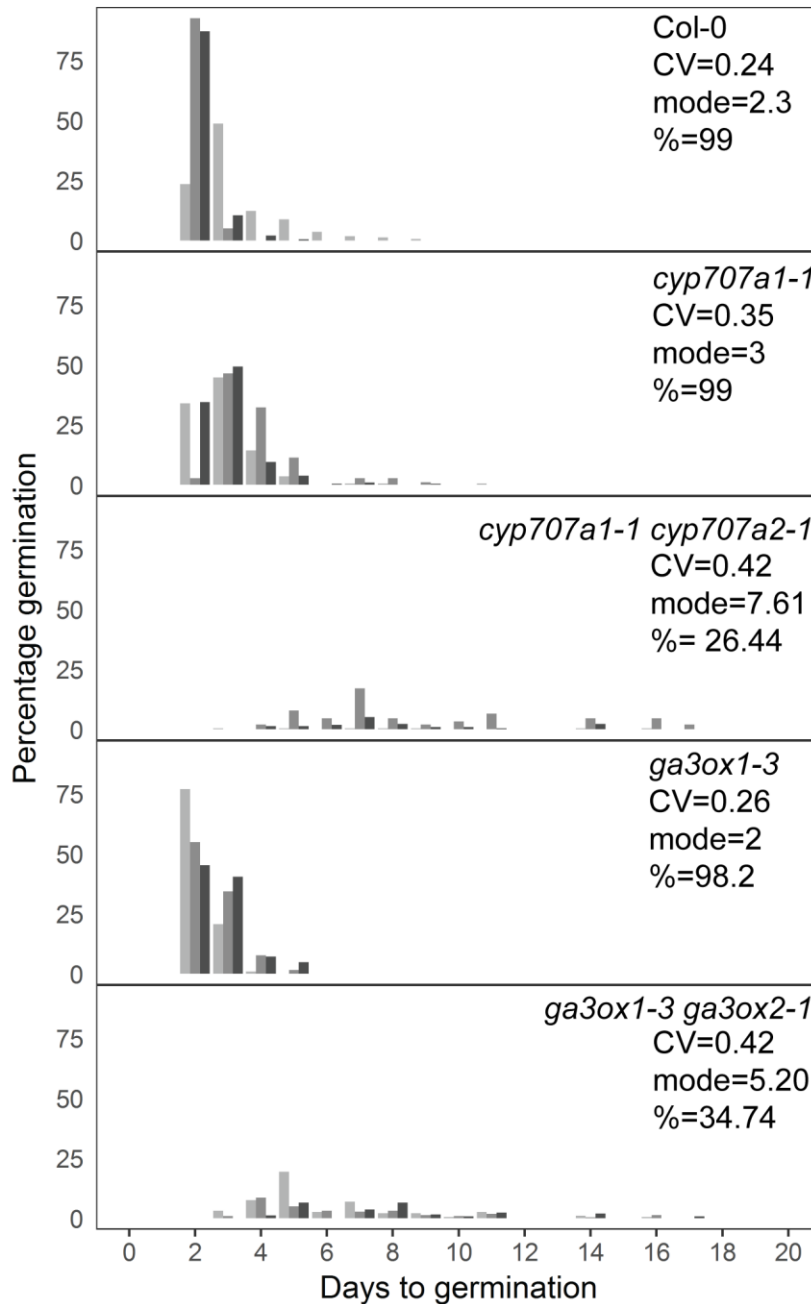

1  
2  
3  
4  
5  
6  
7  
8  
9  
10  
11  
12  
13

**Figure 8. Mutants with altered levels of ABA and GA have altered germination variability.**

Distributions of germination times for indicated genotypes. *cyp707a1-1* and *cyp707a1-1 cyp707a2-1* mutants lack enzymes involved in ABA catabolism, while *ga3ox-3* and *ga3ox1-3 ga3ox2-1* mutants lack enzymes involved in GA biosynthesis. Grey coloured bars show the germination distribution of seed batches from replicate mother plants. For Col-0 and each mutant, the mean CV of germination times, mode days to germination and final percentage germination is shown (averaged across the replicate batches (n=3)). Data are representative of at least two independent experiments for each genotype.

To test genetically the effect of decreasing the GA concentration on the germination time

distribution of Col-0, we used the *ga3ox1-3 ga3ox2-1* mutant, which lacks two enzymes involved in



1 GA biosynthesis (Mitchum et al., 2006). This double mutant, which has reduced GA levels (Mitchum  
2 et al., 2006) showed an increased CV and, similar to the *cyp707a1-1 cyp707a2-1* mutant, had  
3 increased mode and decreased percentage germination (Figure 8). Together with the GA and ABA  
4 dose response experiments, these findings support the model predictions regarding the effects of  
5 altering ABA and GA levels on CV, mode and percentage germination.

6

### 7 **High variability in germination time could function as a bet-hedging strategy**

8

9 We sought to test whether high variability could be beneficial for survival in suddenly varying  
10 environments. To do this, we applied a short heat shock (49°C for 30 minutes) to high and low  
11 variability genotypes, either immediately following sowing or 5 or 8 days after sowing. This  
12 treatment kills seedlings but does not damage ungerminated seeds (Figure 9 “N” treatment (no heat  
13 shock) compared with heat shock on Day 0) (Silva-Correia et al., 2014). We scored germination each  
14 day and followed the seedlings that germinated to see if they died or survived the stress treatment.  
15 We found that higher variability lines showed a higher percentage of seedlings that survived the  
16 stress treatment when the plates were heat shocked at day 5 or day 8 (Figure 9A). This is because  
17 with low variability lines, most seeds germinated before day 5, and these seedlings then tended to  
18 be killed by the heat shock (Figure 9B, Col-0). In higher variability lines, the majority of seedlings that  
19 germinated before the heat shock were killed but late germinating seeds were still available to  
20 germinate after the stress (Figure 9B, M182). The percentage survival at the end of the experiment  
21 showed a positive correlation with both the mode days to germination and the CV of germination  
22 time for a given MAGIC line in an experiment (Figure 9-figure supplement 1).

23

24

25

26

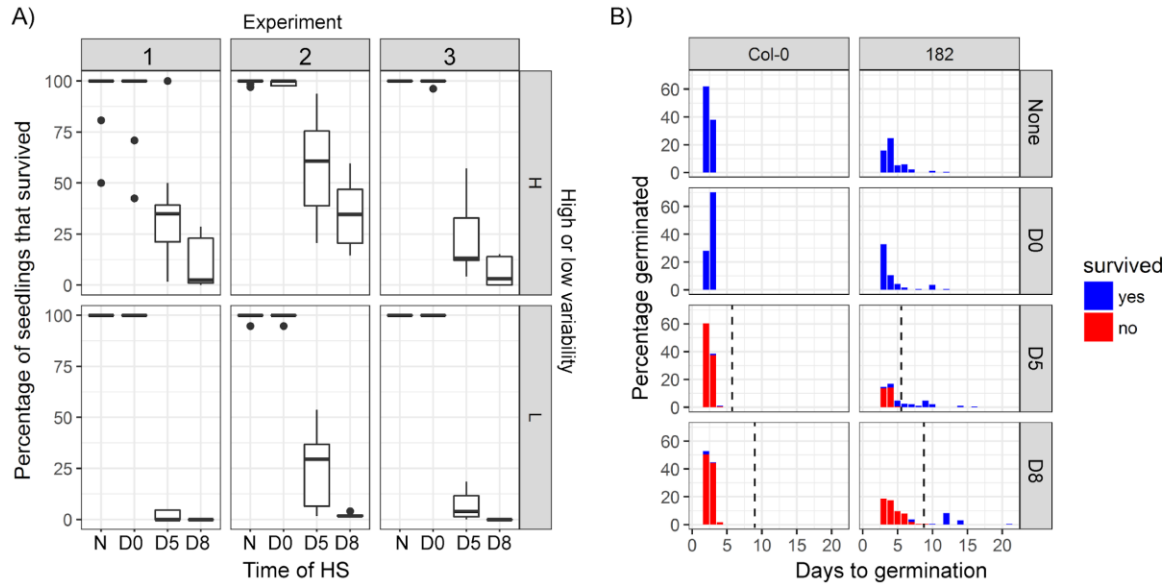

1  
2 **Figure 9. Survival of high and low variability lines when exposed to a short heat stress. A)** High and  
3 low variability MAGIC lines were exposed to a 30 minute heat shock at ~49°C either immediately  
4 after sowing (D0), or 5 or 8 days after sowing (D5 and D8). The treatment “N” shows non-heat  
5 shocked controls. The y axis is the percentage of seeds that germinated that survived until the end of  
6 the experiment (25 days after sowing). Experiment 1 included 3 low variability MAGIC lines, Col-0 (a  
7 low variability accession), plus 8 highly variable lines. Experiments 2 and 3 contained the lines that  
8 were present in experiment 1, plus extra lines, so that in total they included 7 low variability lines (6  
9 low variability MAGIC lines, plus Col-0) and 9 high variability MAGIC lines. Lines were partitioned into  
10 high and low variability lines according to their average CV across the 3 experiments. **B)** Germination  
11 time distributions and survival for an example low variability line (Col-0) and high variability line  
12 (M182). Each row of panels is a different treatment. Bars show the percentage of seeds sown that  
13 germinated on a particular day. Colours of bars show the fractions of plants that germinated on a  
14 particular day that had survived or died by the end of the experiment (25 days after sowing). The  
15 vertical dashed black lines show the timings of heat shocks. Figure 9-figure supplement 1 shows how  
16 survival of a genotype relates to its mode and CV of germination time.

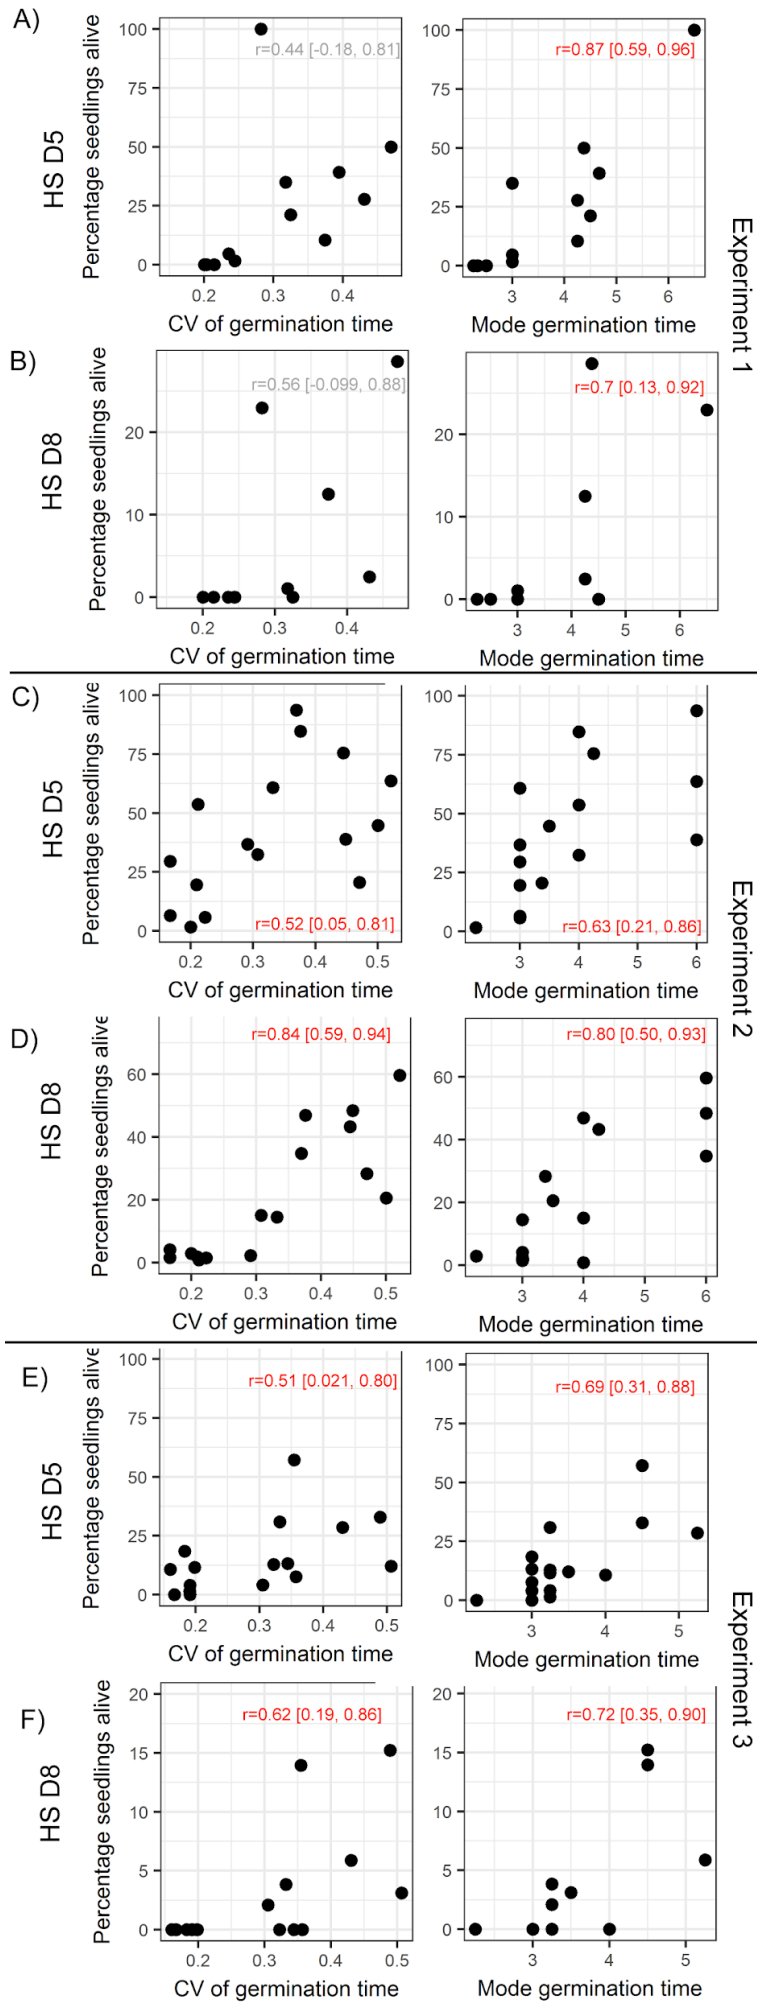

1 **Figure 9-figure supplement 1. Survival of a genotype correlates with mode and CV of germination**  
2 **time.** Scatter plots show the percentage of all germinated seedlings that survived to the end of the  
3 experiment, as a function of the CV of germination time and mode days to germination. A, C and E  
4 show results for plates heat shocked at day 5 and B, D and F show plates that were heat shocked at  
5 day 8, 3 experimental replicates are shown (same experiments as those indicated in Figure 9). On  
6 each plot, Pearson's  $r$  is reported, along with 95% confidence intervals. Cases where there was a  
7 statistically significant correlation (with  $p < 0.05$ ) are shown in red.  
8  
9

## 10 **Discussion**

11 Variability in seed germination time is relevant for plant survival in the wild, where high variability  
12 may function as a bet-hedging strategy. This contrasts to the situation in agriculture, where minimal  
13 levels of variability are desirable to promote crop uniformity needed for optimal harvests (Finch-  
14 Savage and Bassel, 2016; Mitchell et al., 2017). The extent to which variability in germination time is  
15 under genetic control, and therefore could be under selection, has not been well characterised. By  
16 describing detailed distributions of germination time for hundreds of Arabidopsis lines grown in a  
17 common environment, our work reveals that these distributions are genetically controlled, since  
18 they can vary greatly between different accessions and are reproducible for a given genotype. Using  
19 this natural variation, we identified two loci underlying variability, one of which affects variability  
20 relatively independently from other germination traits. Furthermore, modelling and experiments  
21 show that perturbation of the GA/ABA network can modulate variability in germination times in a  
22 predictable manner. These findings suggest that high or low variability could be specifically selected  
23 for, both in the wild, and in crop breeding programmes.

24 Previously it was shown that, in some Arabidopsis accessions, seeds matured on primary  
25 inflorescences had different germination behaviours to those that developed on branches (Boyd et  
26 al., 2007). It was also reported recently that some mutants defective in GA biosynthesis show graded  
27 developmental differences along the inflorescence (Plackett et al., 2018). Here we show that  
28 variability in germination time exists even for seeds from the same silique of Arabidopsis, suggesting  
29 that it is not generated by developmental gradients in the plant. We also show that seeds from  
30 proximal and distal halves of siliques have similar germination behaviours, indicating that variability

1 is likely not caused by gradients of regulatory molecules along the length of the fruit. Thus, our  
2 findings indicate that a mechanism exists to generate different behaviours amongst seeds that are as  
3 equivalent as possible.

4 We show that at least two genetic loci underlie germination variability in the MAGIC population  
5 (Kover et al., 2009). The QTL at ~16Mb on chromosome 3 overlaps with the *DELAY OF*  
6 *GERMINATION 6 (DOG6)* locus (Alonso-Blanco et al., 2003; Bentsink et al., 2010), and is associated  
7 with CV, mean and mode germination time and percent germination. There is evidence to suggest  
8 that the *ANAC060* gene, which regulates ABA sensitivity, underlies this locus (Hanzi, 2014). The peak  
9 of the locus at ~18.6Mb on chromosome 5 identified from our F2 bulked segregant mapping  
10 approach overlaps with the *DOG1* gene (Alonso-Blanco et al., 2003; Bentsink et al., 2006), which also  
11 has been shown to modulate ABA signalling (Née et al., 2017). However, the peak of the Chr 5 QTL  
12 identified in the MAGIC population lies at 19.8 Mb, equidistant between *DOG1* and a newly  
13 identified germination locus, *SET1*, which lies at around 21 Mb on chromosome 5 (Footitt et al.,  
14 2019). *SET1* was shown to influence the sensitivity of seeds buried in the soil to seasonal cycles of  
15 environmental conditions that influence germination time in the field (Footitt et al., 2019). This  
16 region contains a large number of genes involved in ABA response and seed development and it has  
17 been hypothesised that the *ABA-HYPERSENSITIVE GERMINATION1 (AHG1)* gene, which suppresses  
18 ABA-imposed seed dormancy (Fuchs et al., 2013), underlies the effect of the locus (Footitt et al.,  
19 2019). Thus it is possible that *SET1* rather than *DOG1* underlies the Chr5 locus, or that both are  
20 relevant in the MAGIC lines, or indeed that another gene underlies the effect of this locus. Overall  
21 our findings suggest that the locus on chromosome 3 and that on chromosome 5 affect germination  
22 time variability in two different ways, with the chromosome 3 locus having correlated effects on CV,  
23 mode and percentage germination, and the chromosome 5 locus predominantly affecting the CV.

24 Our stochastic model of a simplified representation of the underlying GA/ABA network suggests that  
25 this bistable switch can generate variability in germination times. We show that, when in the

1 bistable region of parameter space, the model tends to generate higher CVs and higher modal  
2 germination times compared with when operating in the monostable rapid germination region. Thus  
3 by having both possible behaviours, the model can generate a large range of “phenotypes” in terms  
4 of CV, mode and percentage germination, accounting for the variation in these traits observed in  
5 MAGIC lines and natural accessions. In line with the different effects of the genetic loci, changes to  
6 parameter values can cause a rich variety of behaviours in terms of the relationship between the CV  
7 and mode of the germination time distributions. This is consistent with the observation of a complex  
8 relationship between CV and mode in the MAGIC lines and accessions, whereby these traits are  
9 weakly positively correlated between lines, but can be partially decoupled.

10 Our model, which behaves as a time dependent toggle switch (Verd et al., 2014) with stochastic  
11 fluctuations, can act as a framework to understand variable germination behaviour and in future  
12 work can be used to integrate additional components of the ABA-GA network. Recent work has  
13 shown that feedback acting upon ABA biosynthesis and catabolism can modulate variability in ABA  
14 concentrations independent of the mean concentration (Johnston and Bassel, 2018). In the future it  
15 will be possible to extend our initial ABA-GA model to evaluate the effects of different feedback  
16 motifs acting on the two hormones. It is likely that with a more detailed implementation of the  
17 network, the model would have an increased ability to ascribe different germination traits and the  
18 effects of different loci to specific parameters, allowing us to make further mechanistic hypotheses  
19 about the effects of particular loci.

20 One limitation of our model is that we represent a seed as a single compartment in which we  
21 simulate the effects of stochastic molecular interactions. In fact the decision to germinate is likely  
22 made by groups of cells in the embryonic root (Topham et al., 2017) and thus it is unclear how the  
23 noise arising in individual cellular compartments would influence this multicellular decision. One  
24 possibility is that noise would be averaged out across the cells, reducing the level of noise at the  
25 multicellular level. This appears to be the case during vernalisation, where polycomb-based

1 epigenetic silencing of the floral repressor *FLOWERING LOCUS C (FLC)* occurs in response to cold  
2 (Angel et al., 2011; Song et al., 2012). In a model of this system (Angel et al., 2015), the silencing of  
3 each *FLC* locus in each cell is proposed to be a probabilistic event, with the likelihood of silencing  
4 increasing with the duration of cold treatment. This generates heterogeneity in *FLC* expression at the  
5 individual cell level, which is then averaged out at the level of down-stream processes, resulting in  
6 the plant flowering at a time that accurately reflects the duration of cold exposure. On the other  
7 hand, noise in gene expression and phenotypic outputs has been reported for multiple pathways in  
8 plants (Jimenez-Gomez et al., 2011; Joseph et al., 2015) and recent work quantifying genome-wide  
9 transcriptional variability between individual seedlings in the same environment shows that for  
10 many genes there is a large degree of between-plant variability in transcript levels (Cortijo et al.,  
11 2019), suggesting that noise is not always averaged out to give uniformity of multicellular  
12 individuals. Rather, for some genetic networks, noise may be amplified to generate phenotypic  
13 differences. Interestingly, this transcriptomic study showed that highly variable genes were enriched  
14 for those involved in the response to ABA, supporting the idea that the bistable switch governing  
15 ABA levels amplifies noise to generate variability in gene expression and phenotypes.

16 Exogenous addition of GA and ABA modulates germination variability, as predicted by our model.  
17 This also fits with a population-based threshold model (Ni and Bradford, 1993) which was derived to  
18 explain the effects of GA and ABA addition on tomato seed germination distributions. In this model,  
19 the distribution of germination times for a seed batch is hypothesised to depend on the mean and  
20 standard deviation of hormone sensitivity. Similar to the effect of varying the parameters governing  
21 ABA sensitivity or production rate in our model, an increase in the mean sensitivity to a germination  
22 repressor, or an increase in the average level of the repressor, causes both an increased average  
23 germination time (increased dormancy) and a larger range of germination times (increased  
24 variability). Thus, according to this framework and consistent with the behaviour of our model,  
25 correlated changes in modal germination time, percentage germination and variability in Arabidopsis

1 lines could be generated through variation in average sensitivities to positive or negative  
2 germination regulators, or through variation in genes that affect their average levels.  
3 Our work reveals that the level of variability in germination times is an important trait that does not  
4 always correlate with the most common measure of germination behaviour, percentage  
5 germination. Thus to fully understand the roles of germination regulators, future work should  
6 involve characterising their effects on CV as well as on traits such as percentage germination and  
7 average germination time.

8 Our heat stress experiments suggest that phenotypic variability in germination time can provide an  
9 advantage, by allowing a subpopulation of seeds to survive an unpredictable period of unfavourable  
10 environmental conditions. This fits with work in desert annuals, which showed that more variable  
11 germination time distributions correlate with more variable environments (Simons, 2009; Simons  
12 and Johnston, 2006). Multiple other aspects of Arabidopsis development have been shown to  
13 display phenotypic variability, including both whole plant phenotypes such as growth rate, and  
14 molecular level phenotypes such as transcript abundance (Hall et al. 2007; Cortijo et al., 2019;  
15 Jimenez-Gomez et al., 2011; Joseph et al., 2015; Shen et al., 2012). Similar to our findings, a common  
16 feature across studies and traits is that multiple QTL tend to affect variability of a trait, and while  
17 some of them also affect the average trait value, others do not. By establishing variability in  
18 germination time as a robust trait that varies between natural accessions of Arabidopsis, our study  
19 provides the foundation for future mechanistic and functional work on phenotypic variability using  
20 this key plant trait.

21

22



## 1 **Materials and Methods**

### 2 **Plant materials**

3 MAGIC lines (Kover et al., 2009) and accessions (Vidigal et al., 2016) were obtained from the  
4 Nottingham Arabidopsis Stock Centre (NASC). The *cyp707a1-1* and *cyp707a1-1 cyp707a2-1* mutants  
5 are as described in (Okamoto et al., 2006) and were kindly provided by Eiji Nambara. *ga3ox1-3* and  
6 the *ga3ox1-3 ga3ox2-1* mutants are as described in (Mitchum et al., 2006) and were obtained from  
7 NASC.

### 8 **Phenotyping**

9 To generate seed for assaying germination time distributions, plants were grown in batches of 40  
10 lines in P40 trays with F2 soil treated with Intercept 70WG (both Levington,  
11 <http://www.scottspprofessional.co.uk>). 345 MAGIC lines and 29 accessions were phenotyped. The  
12 parental plants used for seed collection were sown in a staggered manner across 13 batches. We  
13 checked that the sowing batch of the parental plants was not a major contributor to the variation  
14 seen between lines (~6% of the total phenotypic variance for CV could be attributed to the sowing  
15 batch, while 52% was due to the genotype of the line).

16 Plants for seed collection were grown in Conviron growth chambers with 16 hours of light (170  
17  $\mu\text{M}/\text{m}^2/\text{sec}$ ) and 8 hours of dark, with a day time temperature of 21°C, and night time temperature  
18 of 17°C, at 65% relative humidity. These are standard conditions for Arabidopsis growth and similar  
19 or the same as those used for seed harvest in a number of studies (Donohue et al., 2005; Finch-  
20 Savage et al., 2007; Morrison and Linder, 2014; Springthorpe and Penfield, 2015).

21 Some of the accessions required vernalisation to flower. For these lines, after 10 days of growth in  
22 the standard conditions described above, the plants were transferred to a Conviron growth chamber  
23 with 8 hours of light (15  $\mu\text{M}/\text{m}^2/\text{sec}$ ) and 16 hours of dark, with a constant temperature of 5°C, at  
24 90% relative humidity. For the MAGIC parental accessions that were vernalised, the plants were kept

1 in the cold for a period of 8 weeks. For the Spanish accessions, different lengths of vernalisation  
2 period were used, as described in (Vidigal et al., 2016). Details of which accessions were vernalised,  
3 and the period of vernalisation for the Spanish accessions, are provided as Supplementary files  
4 MAGICParents.csv and SpanishAccessions.csv. To ensure that all plants used for seed harvest for QTL  
5 mapping were treated in an identical way, none of the MAGIC lines were vernalised, thus, only  
6 MAGIC lines that flowered without vernalisation were used in our study.

7 In a given sowing, genotypes were distributed across all trays (in random positions) and the trays  
8 were rotated approximately every 3 days to make sure that the parent plants were exposed to as  
9 similar micro-environmental conditions as possible. Six replicate plants of each line were grown.  
10 Each plant was bagged as soon as its first siliques started to ripen. Plants were watered until most  
11 (~95%) of the siliques had ripened and then watering was stopped and plants were left in the growth  
12 chamber for 7 days to dry (Huang et al., 2014). Seeds obtained from these plants were then stored  
13 for approximately 30 days before sowing (e.g. (Morrison and Linder, 2014)), in a dark chamber kept  
14 at 15°C and 15% relative humidity. To check the quality of seed collected and stored for ~30 days in  
15 these conditions, we performed stratification experiments for a subset of MAGIC lines (32 lines,  
16 including the most highly variable lines), by putting imbibed seeds at 4°C in the dark for 4 days prior  
17 to sowing. All but 3 lines had >90% germination after stratification, and the 3 lines that germinated  
18 poorly after stratification showed >97% germination when sown on plates containing 10µM  
19 Gibberellin A<sub>4</sub> (SIGMA ALDRICH, G7276).

20 Prior to sowing, seeds were sterilised for 4 minutes with 2.5% bleach, followed by one rinse with  
21 70% ethanol for one minute and then washed 4 times with sterile water.

22 After sterilising, seeds were suspended into 0.1% agar and pipetted on to an empty petri dish, with  
23 even spacing between seeds. 0.9% agar was melted, cooled to 35 °C, then poured on top of the  
24 seeds (25 ml per round petri dish) and allowed to dry. This method of sowing seeds below agar  
25 makes scoring seeds over long time periods easier and helps to maintain a more constant

1 environment than sowing on top of agar (where condensation forms) or on filter paper where it is  
2 difficult to maintain constant moisture levels. We checked the germination distributions for 20 lines  
3 that were sown above agar (by pipetting seeds on top of solidified and cooled agar) or below agar,  
4 as described above, and found that we obtained similar CVs of germination time for both methods.  
5 Plates were sealed with micropore tape and put into a tissue culture room with 16 hours of light (85  
6  $\mu\text{M}/\text{m}^2/\text{sec}$ ) and 8 hours of dark, a day time temperature of 20.5 °C, a night time temperature of  
7 18.5°C, and 50% relative humidity. Each petri dish contained approximately 150 seeds. Seed  
8 germination was scored daily, using a dissecting microscope to detect radicle protrusion, and plates  
9 were checked until at least two weeks after the last germination event was observed. The  
10 germination time data is provided in data files MAGICs.csv, MAGICParents.csv and  
11 SpanishAccessions.csv. To calculate germination statistics, the data were filtered to exclude plates  
12 where less than 10 seeds germinated. We reasoned that a minimum number of seeds was needed to  
13 reliably estimate the CV. This filtering meant that 4 MAGIC lines out of the 345 that we phenotyped  
14 were excluded completely from further analysis. For 24 MAGIC lines, 1 or more replicate seed  
15 batches were excluded from further analysis. Following filtering, for 91% of MAGIC lines, at least  
16 three replicate seed batches (each collected from a different parent plant) were used for each  
17 genotype, with one petri dish for each of the three batches. For 9% of lines, only one or two  
18 replicates were used (25 lines had 2 batches, 6 had only one batch).

19 For 32 MAGIC lines, the whole experiment was repeated, with parental plants for seed harvest from  
20 a new independent sowing. The germination time distributions of MAGIC lines and natural  
21 accessions were all determined on agar plates as described above. The Col x No-0 F2 experiment was  
22 phenotyped on soil, in the same conditions as those described above for growing plants for seed  
23 harvest. Transparent lids were kept on the trays of soil and newly germinated seedlings were  
24 removed and counted every day. A seed was considered to have germinated when its cotyledons  
25 had visibly emerged.

## 1 QTL mapping by bulked-segregant analysis

2 Col-0 x No-0 F2 seeds were sown on soil as described above. Seedlings that germinated early (day 4,  
3 early pool, E1) or in two late pools (late 1 pool, L1: days 31-39 and late 2 pool, L2: days 43 to 60)  
4 were moved into separate P40 trays and grown until flowering. The primary apices of 152 plants  
5 from E1, 321 from L1 and 213 plants from L2 were collected onto dry ice shortly after bolting and  
6 stored at -80°C. The apices from each pool were combined and ground together in liquid nitrogen  
7 and then genomic DNA was extracted using a CTAB method (Glazebrook and Weigel, 2002).  
8 Genomic DNA library preparation and sequencing was carried out by Novogene (UK) Company  
9 Limited using NEB Next® Ultra™ DNA Library Prep Kit (Cat No. E7370L). The libraries were sequenced  
10 on an Illumina NovaSeq 6000 machine with 300 cycles (150bp paired-end reads).  
11 All of the bioinformatics processing steps and options used are detailed in the scripts provided with  
12 this paper (see data availability), so we only provide a brief summary here. We used *FastQC v0.11.3*  
13 (Andrews, n.d.) for checking read quality. Quality filtering was performed using *cutadapt 1.16*  
14 (Martin, 2011) to: remove Illumina adapters from the reads, remove reads with ambiguous base  
15 calls, and trim reads if the base quality dropped below a phred-score of 20, keeping only those reads  
16 with at least 50bp after trimming. Over 99% of bases were retained after filtering. The filtered reads  
17 were aligned to the Arabidopsis reference genome (TAIR10 version) using *bwa mem 0.7.12* (Li and  
18 Durbin, 2009) with default options, except we used the `-M` option to mark short split alignments as  
19 secondary. Potential PCR duplicates were removed using *Picard MarkDuplicates 2.18.1* (~20% of the  
20 reads were marked as duplicates). We performed realignment around indels using the  
21 `RealignerTargetCreator` tool from *GATK 3.4-46* (McKenna et al., 2010). Finally, we obtained allele  
22 counts at variant sites using *freebayes v1.2.0* (Garrison and Marth, 2012) using the `--pooled-`  
23 `continuous` mode, and restricting calls to sites with a depth of coverage between 10 and 400  
24 including a minimum Phred base quality score and read mapping quality score of 20, and a minimum  
25 count of 2 and minimum frequency of 1% for the non-reference allele. We did not include indels in

1 the analysis. To assess the presence of a QTL from these data, we used both the  $G'$  statistic of  
2 (Magwene et al., 2011) and the simulation-based approach of (Takagi et al., 2013) to compare the  
3 three pools with each other. Both of these methods are implemented in the *R/QTLseqr v0.7.5.2*  
4 package (Mansfeld and Grumet, 2018) and gave similar results, so we report only the latter.

## 5 **QTL mapping in MAGIC lines**

6 QTL mapping in the MAGIC lines was performed using the *happy.hbrem R* package (Kover et al.,  
7 2009) and our custom package *MagicHelpR v0.1* (available at  
8 <https://github.com/tavareshugo/MagicHelpR>). In summary, for each of the 1254 available markers,  
9 the probability of ancestry of an individual's genotype at that marker was inferred using the function  
10 ``happy`` from the *R/happy.hbrem* package (Mott, 2015). For each marker, an  $N \times 19$  matrix is  
11 obtained with the probabilities that the  $N$  individuals inherited that piece of genome from each of  
12 the 19 founder accessions of the MAGIC population. This matrix was then used to fit a linear model,  
13 regressing the trait of interest onto this probability matrix. This type of model was used for each trait  
14 analysed. In all cases, significance was assessed using an F-test to compare the full model to a  
15 reduced model that excluded the genotype matrix, and we report the  $-\log_{10}(\text{p-value})$  of this test.  
16 We used a genome-wide significance threshold of  $-\log_{10}(\text{p-value}) = 3.5$ , which is an approximate  
17 threshold at  $\alpha = 0.05$  based on simulations (Kover et al., 2009). Significance of candidate QTL was  
18 also confirmed from a permutation-based empirical p-value based on 1000 phenotype  
19 permutations. The variance explained by candidate QTL markers was obtained from the coefficient  
20 of determination ( $R^2$ ) of the linear model.

21 The founder accession's effect at each candidate QTL was estimated using the method in (Kover et  
22 al., 2009) and adapted from the *R* function ``imputed.one.way.anova`` in the *magic.R* script available  
23 at <http://mtweb.cs.ucl.ac.uk/mus/www/magic/> (last accessed May 2020). In summary, each MAGIC  
24 line was assigned to a single founder accession based on its ancestry probabilities at that marker.  
25 MAGIC lines are then grouped by founder accession and the trait's average is calculated for the 19

1 accessions. This procedure was repeated 500 times to produce an average estimate and associated  
2 95% confidence interval (taken as the 0.025 and 0.975 quantiles of the phenotype distributions thus  
3 obtained).

4 All trait data were rank-transformed, to achieve normality and constant variance of the residuals in  
5 the QTL model. However, our results were robust to data transformation.

## 6 **ABA and GA experiments**

7 Dose response experiments were performed on 6 high variability MAGIC lines (M143, M393, M285,  
8 M178, M182, M53) and 5 low variability MAGIC lines (M151, M108, M123, M213, M467), plus Col-0.  
9 Seed batches were pools of seed from 3 parent plants of each genotype. Dose responses were  
10 performed at least twice using independently collected seed batches for each MAGIC line used,  
11 except for MAGIC lines 467 and 151 which have one replicate in the GA dose response experiment.  
12 Seeds were obtained, sowed and grown as described above for phenotyping, except that the  
13 indicated concentrations of Gibberellin A<sub>4</sub> (SIGMA ALDRICH, G7276) or Abscisic acid (SIGMA  
14 ALDRICH, A1049) were added to the 0.9% agar medium used for germination assays. The GA<sub>4</sub> stock  
15 was made using ethanol and the ABA stock using methanol and respective vehicle control  
16 treatments were used. Germination was scored as radicle emergence.

## 17 **Heat shock experiments**

18 Experiments were performed for the following genotypes: low variability lines: M108, M151, M188,  
19 M200, M393, M458, M461, Col-0; high variability lines: M178, M182, M285, M304, M305, M351,  
20 M4, M492. 3 independent experiments (with seed collected from independent sowings of parent  
21 plants) were performed and gave comparable results. Seeds were obtained, sowed and grown as  
22 described above for phenotyping. In a given experimental replicate, for each stress treatment, one  
23 batch of seeds pooled from 3 parent plants was used for each line. For the heat shock treatments,  
24 petri dishes containing seeds and seedlings were wrapped in parafilm and floated in a water bath set

1 to 49°C for 30 minutes, whilst exposed to ambient light. During the heat shock treatments there  
2 were some fluctuations of the temperature on the top of the water bath, such that temperatures  
3 ranged between 48°C and 49.5°C. Seed germination was scored every day by marking the petri  
4 dishes and 25 days after the start of the experiment petri dishes were imaged with a flatbed  
5 scanner. The images obtained were used to determine the number of seeds that germinated on  
6 each day and the number of these that survived until the end of the experiment.

## 7 **Minimal mathematical model for seed germination**

8  
9 We developed a model to capture the relationships between the hormones ABA and GA and key  
10 transcriptional regulators that act as inhibitors of germination. ABA and GA are known to have  
11 opposing effects on the transcription, protein levels or protein activity of the transcriptional  
12 regulators DELLAs, ABI4 and ABI5 (Ariizumi et al., 2008; Liu et al., 2016; Piskurewicz et al., 2008; Shu  
13 et al., 2016; Tyler et al., 2004). Here we represent these germinator inhibitors as one factor, called  
14 Integrator, the production of which is promoted by ABA and the degradation of which is promoted  
15 by GA.

16 The germination inhibitors are known to feedback to influence GA and ABA levels through effects on  
17 their biosynthesis or catabolism (Ko et al., 2006; Oh et al., 2007; Piskurewicz et al., 2008; Shu et al.,  
18 2016, 2013). For example, DELLAs promote the levels of expression of *XERICO*, which promotes ABA  
19 biosynthesis (Ko et al., 2006; Zentella et al., 2007). We capture this in the model by assuming that  
20 Integrator promotes ABA biosynthesis, creating a positive feedback loop between ABA and  
21 Integrator. Since GA inhibits the Integrator, GA ends up effectively inhibiting ABA levels through the  
22 integrator.

23 With regards to the feedback between the germination inhibitors (represented by the Integrator)  
24 and GA, the literature is less clear about the nature of the interaction. ABI4 appears to negatively  
25 regulate GA levels (Shu et al., 2013) supporting a double-negative (i.e. positive) feedback loop  
26 between GA levels and Integrator. However, there are mixed reports about the relationship between

1 DELLAs and GA during germination, with studies suggesting both inhibition (Oh et al., 2007) and  
 2 promotion (Topham et al., 2017; Zentella et al., 2007). As has previously been suggested (Yamaguchi  
 3 and Kamiya, 2000), we assume that on balance the net relationship between the germination  
 4 inhibitors and GA is negative during germination, creating a mutual inhibition between the inhibitors  
 5 and GA levels. This may contribute to the large increases in GA levels that occur following sowing.  
 6 With this set of interactions, since ABA increases the levels of Integrator, it effectively inhibits GA.  
 7 Thus, the model captures the mutual inhibition between ABA and GA. Overall the model exhibits a  
 8 mutual inhibition and mutual activation circuit coupled by Integrator (see Figure 5A), constituting a  
 9 double positive feedback.

10

11 The deterministic model for ABA ([ABA]), GA ([GA] and the Integrator ([I]) is described by the  
 12 following equations:

$$13 \quad \frac{d[ABA]}{dt} = \beta_{ABA} + f_{ABA}([I]) - v_{ABA} [ABA] \quad [1]$$

$$14 \quad \frac{d[GA]}{dt} = \beta_{GA} + \beta_{GA,Z}[Z] + g_{GA}([I]) - v_{GA} [GA] \quad [2]$$

$$15 \quad \frac{d[I]}{dt} = \beta_I + f_I([ABA]) - \left( v_I + f_I([GA]) \right) [I] \quad , \quad [3]$$

16 where  $\beta_X$  and  $v_X$  are constitutive production and degradation rates for each X variable,

17 respectively.  $f_X(y)$  and  $g_X(y)$  correspond to Hill increasing and decreasing regulatory functions

18 acting on variable X, defined as  $f_X(y) = \frac{C_{X,Y}y^h}{\theta_{X,Y}^h + y^h}$  and  $g_X(y) = \frac{C_{X,Y}}{1 + \frac{y^h}{\theta_{X,Y}^h}}$ , respectively, where  $C_{X,Y}$  and

19  $\theta_{X,Y}$  are parameters in the function dependent on variable Y acting on variable X, and h is the

20 exponent in these functions. For simplicity, we set all exponents to the same value. Note that the

21 inverse of  $\theta_{X,Y}$  parameters can be understood as sensitivities to Y acting on X; high  $\theta_{X,Y}$  values will

22 generally require high Y quantities to affect X dynamics through the regulatory function, meaning

23 low sensitivity of X to Y.

24



1 We simulate a sowing-induced increase in GA biosynthesis rates by adding an extra factor, [Z] which  
 2 follows the dynamics governed by equation 4 and feeds into equation 2.

$$3 \quad \frac{d[Z]}{dt} = \beta_Z - v_Z [Z] \quad . \quad [4]$$

4

5 We focus on those parameters leading to either monostability, or bistability, typically showing a low  
 6 GA - high ABA state and a high GA - low ABA stable state. To capture the inhibitory effect of the  
 7 DELLAs, ABI4 and ABI5 (represented by Integrator) on germination, we assume that in each seed the  
 8 Integrator level must drop below a threshold for germination to occur. If the system resides at the  
 9 low GA state for sufficient time, the Integrator can drop below the threshold, driving germination.

10 Our model can be understood as a time-dependent switch (Verd et al., 2014) with stochastic  
 11 fluctuations, and variability in timing - in this case, germination time - is captured when crossing a  
 12 concentration threshold (Ghusinga et al., 2017). Note this circuit can also lead to tristability, but for  
 13 simplicity we do not explore this model feature in detail.

14 In simulations of exogenous ABA or GA application, the Integrator equation follows the dynamics

$$15 \quad \frac{d[I]}{dt} = \beta_I + f_I([ABA] + [ABA]_{exo}) - \left( v_I + f_I([GA] + [GA]_{exo}) \right) [I], \quad [5]$$

16 where  $[ABA]_{exo}$  and  $[GA]_{exo}$  are constant variables representing the concentrations of exogenous ABA  
 17 and GA.

18

19 To take into account the intrinsic fluctuations of the network, we simulated the stochastic chemical  
 20 Langevin equations (Gillespie, 2000); (Adalsteinsson et al., 2004) of the model equations [1-4],  
 21 which read

$$22 \quad \frac{d[ABA]}{dt} = \beta_{ABA} + f_{ABA}([I]) - v_{ABA} [ABA] + \sqrt{\frac{1}{2V} (\beta_{ABA} + f_{ABA}([I]) + v_{ABA} [ABA])} \eta_{ABA}(t)$$

23 [6]

$$1 \quad \frac{d[GA]}{dt} = \beta_{GA} + \beta_{GA,Z}[Z] + g_{GA}([I]) - v_{GA} [GA] +$$

$$2 \quad \sqrt{\frac{1}{2V}(\beta_{GA} + \beta_{GA,Z}[Z] + g_{GA}([I]) + v_{GA} [GA])} \eta_{GA}(t) \quad [7]$$

$$3 \quad \frac{d[I]}{dt} = \beta_I + f_I([ABA]) - (v_I + f_I([GA])) [I] +$$

$$4 \quad \sqrt{\frac{1}{2V}(\beta_I + f_I([ABA]) + (v_I + g_I([GA])) [I])} \eta_I(t) \quad [8]$$

$$5 \quad \frac{d[Z]}{dt} = \beta_Z - v_Z [Z] + \sqrt{\frac{1}{2V}(\beta_Z - v_Z [Z])} \eta_Z(t) \quad , \quad [9]$$

6 where  $V$  is an effective volume of the modelled system, which determines the strength of the  
7 stochastic term;  $\eta_x$  is a gaussian random number with zero mean that fulfils  $\langle \eta_x(t) \eta_y(t') \rangle = \delta(t-t') \delta_{x,y}$ ;  
8  $\delta_{x,y}$  is the Kronecker delta, where  $X$  and  $Y$  refer to concentration variables and  $\delta(t-t')$  is the Dirac  
9 delta, where  $t$  and  $t'$  are two arbitrary time points. We will refer to noise intensity as the inverse of  
10 the  $V$  parameter, given that the stochastic terms are inversely proportional to  $V$ . Note that all  
11 stochastic equations recover the deterministic limit when  $V$  parameter goes to infinity, as expected  
12 for the standard chemical Langevin equation (Gillespie, 2000).

13

14 The stochastic version for equation [5] for modelling the application of exogenous ABA and GA reads

$$15 \quad \frac{d[I]}{dt} = \beta_I + f_I([ABA] + [ABA]_{exo}) - (v_I + f_I([GA] + [GA]_{exo})) [I] +$$

$$16 \quad \sqrt{\frac{1}{2V}(\beta_I + f_I([ABA] + [ABA]_{exo}) - (v_I + f_I([GA] + [GA]_{exo})) [I])} \eta_I(t) \quad . \quad [10]$$

17

18 This bistable switch model is reminiscent of the bistable switch model proposed by Topham et al.,  
19 2017, although the mutual inhibition has been implemented differently, and we considered  
20 stochastic fluctuations.

21 Initial conditions were set at the fixed point of the deterministic model that exhibited the highest  
22 Integrator value before the sowing-induced increase in GA biosynthesis (i.e., the highest root  
23 solution for the Integrator when  $\beta_{GA,Z}=0$ ). When exogenous ABA or GA were applied, we assumed

1 that seeds were in the same initial state as they would have been in the absence of exogenous  
2 hormone treatments. Numerical integration of the chemical Langevin equations with the  $\hat{\text{ito}}$   
3 interpretation was performed with the Heun algorithm (Carrillo et al., 2003) with an absorptive  
4 barrier at 0 to prevent negative concentration values. After each integration step, seeds were tagged  
5 as germinated if their Integrator concentration was below the germination threshold. The  
6 integration time step was set at  $dt=0.1$ . All simulations were stopped at time 1000.

7 Fixed points of the deterministic dynamics were computed by finding the solutions to the nullclines  
8 for the deterministic model equations [1-4], i.e.,  $d[ABA]/dt=d[GA]/dt=d[I]/dt=d[Z]/dt=0$ , and then by  
9 substituting all the variables into the Integrator equation. The algebraic equation to solve reads

$$10 \quad [I]_0 = \beta_I + f_I([ABA]_0) - \left( \nu_I + f_I([GA]_0) \right), \quad [11]$$

11 with

$$12 \quad [ABA]_0 = \frac{\beta_{ABA} + f_{ABA}([I]_0)}{\nu_{ABA}} \quad [12]$$

$$13 \quad [GA]_0 = \frac{\beta_{GA} + \beta_{GA,Z}[Z]_0 + g_{GA}([I]_0)}{\nu_{GA}} \quad [13]$$

$$14 \quad [Z]_0 = \frac{\beta_Z}{\nu_Z}, \quad [14]$$

15 where  $[ABA]_0$ ,  $[GA]_0$ ,  $[I]_0$  and  $[Z]_0$  are the steady state solutions of the different variables. For finding  
16 the fixed points in the cases of exogenous application of GA and ABA, an equivalent procedure was  
17 performed with Equations [1-3] and [5].

18

19 To find all the solutions at each particular parameter set, we first used the bisection method  
20 throughout logarithmically spaced intervals for the Integrator variable to find approximate solutions,  
21 and then we used the `opt.brentq` scipy function in Python to find the exact solutions. We also  
22 represented the left and right hand side of equation [11] or an equivalent equation for the  
23 exogenous application of GA and ABA to graphically see the solutions of the system (see Figure 5-  
24 figure supplement 1 and Figure 6-figure supplement 2). In these plots, we represented the

1 deterministic stability by analysing the sign of  $dl/dt$  at the vicinity of the solutions (Strogatz, 2015).  
2 Upon the variation of a certain parameter value or the application of exogenous ABA or GA, a given  
3 stable fixed point will approach to (or get further from) the separatrix, the hyperplane in the solution  
4 space separating the basins of attraction of the stable fixed points (Strogatz, 2015), which contains  
5 an unstable fixed point in our case. When studying the stochastic system, we will assume that a  
6 stable fixed point will lose stability when it approaches the unstable fixed point, given that this most  
7 likely will facilitate the stochastic switching to the other stable fixed point; conversely, a stable fixed  
8 point will gain stability when it gets further from the unstable fixed point. This assumption is  
9 consistent with the outcome of our simulations (Figure 6-figure supplement 1 and Figure 6-figure  
10 supplement 2).

11

12 Unless otherwise stated, parameter values were set to the following values (all units are arbitrary):  
13  $\beta_{ABA}=1$ ,  $\beta_{GA}=0.3$ ,  $\beta_{GA,Z}=0.01$ ,  $\beta_Z=39$  and  $\beta_I=0.3$  for the production rates;  $\varrho_{ABA}=\varrho_{GA}=1$ ,  $\varrho_Z=0.1$  and  $\varrho_I=0.4$   
14 for the degradation rates; thresholds were  $\theta_{ABA,I}=3.7$ ,  $\theta_{GA,I}=1.2$ ,  $\theta_{I,ABA}=6.5$  and  $\theta_{I,GA}=6$ ; coefficients for  
15 the regulatory functions are  $C_{ABA,I}=10$ ,  $C_{GA,I}=4$ ,  $C_{I,ABA}=10$  and  $C_{I,GA}=6$ ; exponents in the regulatory  
16 functions were all set to  $h=4$ ; the effective volume was set to  $V=30$ ; the Integrator threshold for  
17 germination was set to 2. For Figure 5, in B,  $\varrho_{ABA}=1.58$ ; in C and E,  $\theta_{I,ABA}=10$ ; in D,  $V=1$ .

18

19 To better understand the dynamics across several parameter ranges, we performed simulations  
20 varying 2 parameters at the same time. The resolution of the parameter exploration was of 4 to 5  
21 parameter values per order of magnitude, logarithmically spaced. In this parameter space  
22 exploration, we also studied the different regions of the parameter space that could be predicted  
23 from nullcline analysis. This allowed us to find the bistable and tristable regions of the parameter  
24 space, the regions where no germination is expected in the deterministic limit and the regions where  
25 germination would instantaneously occur. The remaining regions in the parameter space were  
26 monostable. Note that monostable, bistable and tristable regions were computed by counting the

1 number of steady states after the rise of GA biosynthesis. Regions where no germination would  
2 occur in the deterministic limit were those where the lowest fixed point for the integrator was  
3 higher than the germination threshold. Regions where germination would instantaneously occur  
4 were those regions having the highest Integrator fixed point below the germination threshold. CV  
5 and mode of the simulations were represented when there were more than nine seeds germinating  
6 out of 1000, so the percentage of germination was equal to or higher than 1 %.

7  
8 The theoretical regions across the parameter spaces closely predicted through nullcline analysis of  
9 the deterministic model the stochastic simulation outcomes (Figure 5-figure supplement 3). One  
10 exception was that simulations showed that occasionally some germination happened after a small  
11 number of simulation steps in the instantaneous germination region. In these cases, even if initial  
12 conditions were below the germination threshold, after an integrator step, the Integrator variable  
13 was not below the threshold anymore due to the stochastic fluctuations, and therefore, germination  
14 happened later on during the simulation (Figure 5-figure supplement 3F). Also, in the area where  
15 no germination was expected in the deterministic limit, germination could occur in some occasions  
16 due to stochastic fluctuations, leading to different germination percentages. This happened either  
17 when the germination threshold was just below the lowest target fixed point after the rise of GA  
18 biosynthesis, or at high noise intensities (e.g., see Figure 5-figure supplement 3E, G).

19  
20 Our theoretical analysis and simulations showed that there are two different prototypical dynamical  
21 behaviours that are most biologically relevant (Figure 5-figure supplement 1). On one side,  
22 simulations in which there is bistability after the rise of GA biosynthesis, where seeds can undergo a  
23 transient in which they remain in a high Integrator state above the germination threshold, until  
24 stochastic fluctuations make them switch to the low Integrator state, driving germination. On the  
25 other side, simulations in which there is monostability after the rise of GA biosynthesis, where the  
26 seeds achieve the low Integrator state in a more direct manner. Those simulations falling within the

1 instantaneous germination region would not be biologically relevant, given that a certain time is  
2 needed for seeds to germinate after sowing. Simulations leading to germination and falling within  
3 the non germination region in the deterministic limit would also be less biologically relevant, given  
4 that the Integrator would repeatedly cross the threshold back and forth, not persisting below it.

5

6 For simplicity, throughout the text, we call monostable regions those regions in the parameter space  
7 that are monostable after the rise of GA biosynthesis and are biologically relevant (i.e., the white  
8 theoretical predicted regions in Figure 5-figure supplement 3). Note the instantaneous germination  
9 regions and the no germination regions can also contain monostable, bistable and tristable cases. In  
10 Figure 5-figure supplement 4 and Figure 5-figure supplement 5 we exclude areas of parameter space  
11 that have these less biologically relevant behaviours.

12

13 The parameter space explorations and derived panels show stochastic simulation runs for 400 seeds  
14 (Figure 5; Figure 5-figure supplements 2-5). The dose dependence plots and derived panels show  
15 simulation runs for 4000 seeds (Figure 6; Figure 6-figure supplement 1), as well as simulations shown  
16 in Figure 5-figure supplement 1. Two additional stochastic simulations on 40 seeds were run in  
17 relation to Figure 5-figure supplement 1A, H, to study whether germination occurred before the rise  
18 of GA biosynthesis (i.e., for  $\beta_{GA,Z}=0$ ). We found that no germination occurred for the scenario shown  
19 in panel (A), while a low percentage of seeds germinated (12.5 %) for the scenario shown in panel  
20 (H).

21 Numerical simulations were performed with the Organism simulator  
22 (<https://gitlab.com/sluc/teamHJ/Organism> (Jönsson et al., 2005)). Modelling figures were produced  
23 with the Matplotlib Python library (Hunter, 2007).

1

## 2 **Data availability statement.**

3 Whole genome sequence data was deposited to NCBI's Short Read Archive (BioProject accession

4 PRJNA486286). All data analysis and modelling scripts can be found at

5 [https://gitlab.com/slcu/teamJL/abley\\_formosa\\_et al\\_2020](https://gitlab.com/slcu/teamJL/abley_formosa_et al_2020). Both the raw and processed

6 experimental data for use with the analysis scripts are available from the Cambridge Apollo

7 Repository (doi:X - persistent DOI will be available upon acceptance, but reviewers can provisionally

8 download the data from: <https://drive.google.com/file/d/1-3YKuCFcRYVk->

9 [B4RW1ZBZ6GkpIVHCM3D/view?usp=sharing](https://drive.google.com/file/d/1-3YKuCFcRYVk-B4RW1ZBZ6GkpIVHCM3D/view?usp=sharing)).

10

## 11 **Acknowledgements**

12 We thank Sandra Cortijo for critical reading of the manuscript and Mana Afsharinafar, Casandra

13 Villava, Ting Wang and Helena Kelly for help with taking care of plants and seed scoring. P. F.-J.

14 thanks Ruben Perez-Carrasco for fruitful discussions about the modelling. Work in the Locke and

15 Leyser labs was supported by fellowships from the Gatsby Charitable Foundation (Locke lab:

16 GAT3272/GLC and Leyser Lab: GAT3272C).

17

## 18 **Competing interests**

19 The authors declare that no competing interests exist.

20

## 21 **References**

22 Adalsteinsson, D., McMillen, D., Elston, T.C., 2004. Biochemical Network Stochastic Simulator

23 (BioNetS): software for stochastic modeling of biochemical networks. *BMC Bioinformatics* 5, 24.

24 doi:10.1186/1471-2105-5-24

25 Alonso-Blanco, C., Bentsink, L., Hanhart, C.J., Blankestijn-de Vries, H., Koornneef, M., 2003. Analysis

26 of natural allelic variation at seed dormancy loci of *Arabidopsis thaliana*. *Genetics* 164, 711–

27 729.

- 1 Alon, U., 2007. Network motifs: theory and experimental approaches. *Nat. Rev. Genet.* 8, 450–461.  
2 doi:10.1038/nrg2102
- 3 Andrews, S., n.d. FastQC A Quality Control tool for High Throughput Sequence Data [WWW  
4 Document]. URL <https://www.bioinformatics.babraham.ac.uk/projects/fastqc/> (accessed  
5 7.11.18).
- 6 Angel, A., Song, J., Dean, C., Howard, M., 2011. A Polycomb-based switch underlying quantitative  
7 epigenetic memory. *Nature* 476, 105–108. doi:10.1038/nature10241
- 8 Angel, A., Song, J., Yang, H., Questa, J.I., Dean, C., Howard, M., 2015. Vernalizing cold is registered  
9 digitally at FLC. *Proc Natl Acad Sci USA* 112, 4146–4151. doi:10.1073/pnas.1503100112
- 10 Ariizumi, T., Murase, K., Sun, T.-P., Steber, C.M., 2008. Proteolysis-independent downregulation of  
11 DELLA repression in Arabidopsis by the gibberellin receptor GIBBERELLIN INSENSITIVE DWARF1.  
12 *Plant Cell* 20, 2447–2459. doi:10.1105/tpc.108.058487
- 13 Balaban, N.Q., Merrin, J., Chait, R., Kowalik, L., Leibler, S., 2004. Bacterial persistence as a phenotypic  
14 switch. *Science* 305, 1622–1625. doi:10.1126/science.1099390
- 15 Baskin, J.M., Baskin, C.C., 2004. A classification system for seed dormancy. *Seed Sci. Res.* 14.  
16 doi:10.1079/SSR2003150
- 17 Bentsink, L., Hanson, J., Hanhart, C.J., Blankestijn-de Vries, H., Coltrane, C., Keizer, P., El-Lithy, M.,  
18 Alonso-Blanco, C., de Andrés, M.T., Reymond, M., van Eeuwijk, F., Smeekens, S., Koornneef, M.,  
19 2010. Natural variation for seed dormancy in Arabidopsis is regulated by additive genetic and  
20 molecular pathways. *Proc Natl Acad Sci USA* 107, 4264–4269. doi:10.1073/pnas.1000410107
- 21 Bentsink, L., Jowett, J., Hanhart, C.J., Koornneef, M., 2006. Cloning of DOG1, a quantitative trait locus  
22 controlling seed dormancy in Arabidopsis. *Proc Natl Acad Sci USA* 103, 17042–17047.  
23 doi:10.1073/pnas.0607877103
- 24 Bewley, J.D., 1997. Seed germination and dormancy. *Plant Cell* 9, 1055–1066.  
25 doi:10.1105/tpc.9.7.1055
- 26 Boyd, E.W., Dorn, L.A., Weinig, C., Schmitt, J., 2007. Maternal Effects and Germination Timing  
27 Mediate the Expression of Winter and Spring Annual Life Histories in *Arabidopsis thaliana*. *Int. J.*  
28 *Plant Sci.* 168, 205–214. doi:10.1086/509587
- 29 Bradford, K.J., 1990. A water relations analysis of seed germination rates. *Plant Physiol.* 94, 840–849.
- 30 Bradford, K.J., Trewavas, A.J., 1994. Sensitivity thresholds and variable time scales in plant hormone  
31 action. *Plant Physiol.* 105, 1029–1036.
- 32 Carrillo, O., Ibañes, M., García-Ojalvo, J., Casademunt, J., Sancho, J.M., 2003. Intrinsic noise-induced  
33 phase transitions: beyond the noise interpretation. *Phys. Rev. E Stat. Nonlin. Soft Matter Phys.*  
34 67, 046110. doi:10.1103/PhysRevE.67.046110
- 35 Clercx, E.J.M., El-Lithy, M.E., Vierling, E., Ruys, G.J., Blankestijn-De Vries, H., Groot, S.P.C.,  
36 Vreugdenhil, D., Koornneef, M., 2004. Analysis of natural allelic variation of Arabidopsis seed  
37 germination and seed longevity traits between the accessions Landsberg erecta and Shaldara,  
38 using a new recombinant inbred line population. *Plant Physiol.* 135, 432–443.  
39 doi:10.1104/pp.103.036814
- 40 Cohen, D., 1966. Optimizing reproduction in a randomly varying environment. *J. Theor. Biol.* 12, 119–  
41 129. doi:10.1016/0022-5193(66)90188-3
- 42 Cortijo, S., Aydin, Z., Ahnert, S., Locke, J.C., 2019. Widespread inter-individual gene expression  
43 variability in *Arabidopsis thaliana*. *Mol. Syst. Biol.* 15, e8591. doi:10.15252/msb.20188591
- 44 Derx, M.P.M., Karssen, C.M., 1993. Effects of light and temperature on seed dormancy and  
45 gibberellin-stimulated germination in *Arabidopsis thaliana*: studies with gibberellin-deficient



- 1 and -insensitive mutants. *Physiol. Plant.* 89, 360–368. doi:10.1111/j.1399-3054.1993.tb00167.x
- 2 Donohue, K., Dorn, L., Griffith, C., Kim, E., Aguilera, A., Polisetty, C.R., Schmitt, J., 2005. The
- 3 evolutionary ecology of seed germination of *Arabidopsis thaliana*: variable natural selection on
- 4 germination timing. *Evolution* 59, 758–770. doi:10.1111/j.0014-3820.2005.tb01751.x
- 5 Eldar, A., Elowitz, M.B., 2010. Functional roles for noise in genetic circuits. *Nature* 467, 167–173.
- 6 doi:10.1038/nature09326
- 7 Finch-Savage, W.E., Bassel, G.W., 2016. Seed vigour and crop establishment: extending performance
- 8 beyond adaptation. *J. Exp. Bot.* 67, 567–591. doi:10.1093/jxb/erv490
- 9 Finch-Savage, W.E., Cadman, C.S.C., Toorop, P.E., Lynn, J.R., Hilhorst, H.W.M., 2007. Seed dormancy
- 10 release in *Arabidopsis Cvi* by dry after-ripening, low temperature, nitrate and light shows
- 11 common quantitative patterns of gene expression directed by environmentally specific sensing.
- 12 *Plant J.* 51, 60–78. doi:10.1111/j.1365-313X.2007.03118.x
- 13 Finch-Savage, W.E., Leubner-Metzger, G., 2006. Seed dormancy and the control of germination. *New*
- 14 *Phytol.* 171, 501–523. doi:10.1111/j.1469-8137.2006.01787.x
- 15 Footitt, S., Walley, P.G., Lynn, J.R., Hambidge, A.J., Penfield, S., Finch-Savage, W.E., 2019. Trait
- 16 analysis reveals *DOG1* determines initial depth of seed dormancy, but not changes during
- 17 dormancy cycling that result in seedling emergence timing. *New Phytol.* doi:10.1111/nph.16081
- 18 Fuchs, S., Grill, E., Meskiene, I., Schweighofer, A., 2013. Type 2C protein phosphatases in plants. *The*
- 19 *FEBS Journal*.
- 20 Garrison, E., Marth, G., 2012. Haplotype-based variant detection from short-read sequencing. *arXiv*.
- 21 Ghusinga, K.R., Dennehy, J.J., Singh, A., 2017. First-passage time approach to controlling noise in the
- 22 timing of intracellular events. *Proc Natl Acad Sci USA* 114, 693–698.
- 23 doi:10.1073/pnas.1609012114
- 24 Gillespie, D.T., 2000. The chemical Langevin equation. *J. Chem. Phys.* 113, 297.
- 25 doi:10.1063/1.481811
- 26 Glazebrook, J., Weigel, D., 2002. *Arabidopsis: A laboratory manual*. Cold Spring Harbo r Laboratory
- 27 Press, New York.
- 28 Hanzi, H., 2014. *Environmental Regulation of Seed Performance (Doctoral dissertation)*. Wageningen
- 29 University.
- 30 Huang, Z., Footitt, S., Finch-Savage, W.E., 2014. The effect of temperature on reproduction in the
- 31 summer and winter annual *Arabidopsis thaliana* ecotypes *Bur* and *Cvi*. *Ann. Bot.* 113, 921–929.
- 32 doi:10.1093/aob/mcu014
- 33 Hunter, J.D., 2007. *Matplotlib: A 2D Graphics Environment*. *Comput. Sci. Eng.* 9, 90–95.
- 34 doi:10.1109/MCSE.2007.55
- 35 Jimenez-Gomez, J.M., Corwin, J.A., Joseph, B., Maloof, J.N., Kliebenstein, D.J., 2011. Genomic
- 36 analysis of QTLs and genes altering natural variation in stochastic noise. *PLoS Genet.* 7,
- 37 e1002295. doi:10.1371/journal.pgen.1002295
- 38 Johnston, I.G., Bassel, G.W., 2018. Identification of a bet-hedging network motif generating noise in
- 39 hormone concentrations and germination propensity in *Arabidopsis*. *J. R. Soc. Interface* 15.
- 40 doi:10.1098/rsif.2018.0042
- 41 Jönsson, H., Heisler, M., Reddy, G.V., Agrawal, V., Gor, V., Shapiro, B.E., Mjolsness, E., Meyerowitz,
- 42 E.M., 2005. Modeling the organization of the *WUSCHEL* expression domain in the shoot apical
- 43 meristem. *Bioinformatics* 21 Suppl 1, i232-40. doi:10.1093/bioinformatics/bti1036
- 44 Joseph, B., Corwin, J.A., Kliebenstein, D.J., 2015. Genetic variation in the nuclear and organellar
- 45 genomes modulates stochastic variation in the metabolome, growth, and defense. *PLoS Genet.*

- 1 11, e1004779. doi:10.1371/journal.pgen.1004779
- 2 Kerdaffrec, E., Nordborg, M., 2017. The maternal environment interacts with genetic variation in  
3 regulating seed dormancy in Swedish *Arabidopsis thaliana*. PLoS ONE 12, e0190242.  
4 doi:10.1371/journal.pone.0190242
- 5 Kover, P.X., Valdar, W., Trakalo, J., Scarcelli, N., Ehrenreich, I.M., Purugganan, M.D., Durrant, C.,  
6 Mott, R., 2009. A Multiparent Advanced Generation Inter-Cross to fine-map quantitative traits  
7 in *Arabidopsis thaliana*. PLoS Genet. 5, e1000551. doi:10.1371/journal.pgen.1000551
- 8 Ko, J.-H., Yang, S.H., Han, K.-H., 2006. Upregulation of an *Arabidopsis* RING-H2 gene, XERICO, confers  
9 drought tolerance through increased abscisic acid biosynthesis. Plant J. 47, 343–355.  
10 doi:10.1111/j.1365-3113X.2006.02782.x
- 11 Kushiro, T., Okamoto, M., Nakabayashi, K., Yamagishi, K., Kitamura, S., Asami, T., Hirai, N., Koshiba,  
12 T., Kamiya, Y., Nambara, E., 2004. The *Arabidopsis* cytochrome P450 CYP707A encodes ABA 8'-  
13 hydroxylases: key enzymes in ABA catabolism. EMBO J. 23, 1647–1656.  
14 doi:10.1038/sj.emboj.7600121
- 15 Lewontin, R.C., Cohen, D., 1969. On population growth in a randomly varying environment. Proc Natl  
16 Acad Sci USA 62, 1056–1060.
- 17 Liu, X., Hou, X., 2018. Antagonistic regulation of ABA and GA in metabolism and signaling pathways.  
18 Front. Plant Sci. 9, 251. doi:10.3389/fpls.2018.00251
- 19 Liu, X., Hu, P., Huang, M., Tang, Y., Li, Y., Li, L., Hou, X., 2016. The NF-YC-RGL2 module integrates GA  
20 and ABA signalling to regulate seed germination in *Arabidopsis*. Nat. Commun. 7, 12768.  
21 doi:10.1038/ncomms12768
- 22 Li, H., Durbin, R., 2009. Fast and accurate short read alignment with Burrows-Wheeler transform.  
23 Bioinformatics 25, 1754–1760. doi:10.1093/bioinformatics/btp324
- 24 Li, P., Zhou, H., Shi, X., Yu, B., Zhou, Y., Chen, S., Wang, Y., Peng, Y., Meyer, R.C., Smeekens, S.C.,  
25 Teng, S., 2014. The ABI4-induced *Arabidopsis* ANAC060 transcription factor attenuates ABA  
26 signaling and renders seedlings sugar insensitive when present in the nucleus. PLoS Genet. 10,  
27 e1004213. doi:10.1371/journal.pgen.1004213
- 28 Magwene, P.M., Willis, J.H., Kelly, J.K., 2011. The statistics of bulk segregant analysis using next  
29 generation sequencing. PLoS Comput. Biol. 7, e1002255. doi:10.1371/journal.pcbi.1002255
- 30 Mansfeld, B.N., Grumet, R., 2018. QTLseqr: An R Package for Bulk Segregant Analysis with Next-  
31 Generation Sequencing. Plant Genome 11. doi:10.3835/plantgenome2018.01.0006
- 32 Martins, B.M.C., Locke, J.C.W., 2015. Microbial individuality: how single-cell heterogeneity enables  
33 population level strategies. Curr. Opin. Microbiol. 24, 104–112. doi:10.1016/j.mib.2015.01.003
- 34 Martin, M., 2011. Cutadapt removes adapter sequences from high-throughput sequencing reads.  
35 EMBnet j. 17, 10. doi:10.14806/ej.17.1.200
- 36 McKenna, A., Hanna, M., Banks, E., Sivachenko, A., Cibulskis, K., Kernytsky, A., Garimella, K.,  
37 Altshuler, D., Gabriel, S., Daly, M., DePristo, M.A., 2010. The Genome Analysis Toolkit: a  
38 MapReduce framework for analyzing next-generation DNA sequencing data. Genome Res. 20,  
39 1297–1303. doi:10.1101/gr.107524.110
- 40 Meng, P.-H., Macquet, A., Loudet, O., Marion-Poll, A., North, H.M., 2008. Analysis of natural allelic  
41 variation controlling *Arabidopsis thaliana* seed germinability in response to cold and dark:  
42 identification of three major quantitative trait loci. Mol. Plant 1, 145–154.  
43 doi:10.1093/mp/ssm014
- 44 Mitchell, J., Johnston, I.G., Bassel, G.W., 2017. Variability in seeds: biological, ecological, and  
45 agricultural implications. J. Exp. Bot. 68, 809–817. doi:10.1093/jxb/erw397

- 1 Mitchum, M.G., Yamaguchi, S., Hanada, A., Kuwahara, A., Yoshioka, Y., Kato, T., Tabata, S., Kamiya,  
2 Y., Sun, T.-P., 2006. Distinct and overlapping roles of two gibberellin 3-oxidases in Arabidopsis  
3 development. *Plant J.* 45, 804–818. doi:10.1111/j.1365-313X.2005.02642.x
- 4 Morrison, G.D., Linder, C.R., 2014. Association mapping of germination traits in Arabidopsis thaliana  
5 under light and nutrient treatments: searching for G×E effects. *G3 (Bethesda)* 4, 1465–1478.  
6 doi:10.1534/g3.114.012427
- 7 Mott, R., 2015. happy.hbrem: Quantitative Trait Locus genetic analysis in Heterogeneous Stocks.  
8 Née, G., Kramer, K., Nakabayashi, K., Yuan, B., Xiang, Y., Miatton, E., Finkemeier, I., Soppe, W.J.J.,  
9 2017. DELAY OF GERMINATION1 requires PP2C phosphatases of the ABA signalling pathway to  
10 control seed dormancy. *Nat. Commun.* 8, 72. doi:10.1038/s41467-017-00113-6
- 11 Ni, B.R., Bradford, K.J., 1993. Germination and Dormancy of Abscisic Acid- and Gibberellin-Deficient  
12 Mutant Tomato (*Lycopersicon esculentum*) Seeds (Sensitivity of Germination to Abscisic Acid,  
13 Gibberellin, and Water Potential). *Plant Physiol.* 101, 607–617.
- 14 Oh, E., Yamaguchi, S., Hu, J., Yusuke, J., Jung, B., Paik, I., Lee, H.-S., Sun, T., Kamiya, Y., Choi, G., 2007.  
15 PIL5, a phytochrome-interacting bHLH protein, regulates gibberellin responsiveness by binding  
16 directly to the GAI and RGA promoters in Arabidopsis seeds. *Plant Cell* 19, 1192–1208.  
17 doi:10.1105/tpc.107.050153
- 18 Oh, E., Yamaguchi, S., Kamiya, Y., Bae, G., Chung, W.-I., Choi, G., 2006. Light activates the  
19 degradation of PIL5 protein to promote seed germination through gibberellin in Arabidopsis.  
20 *Plant J.* 47, 124–139. doi:10.1111/j.1365-313X.2006.02773.x
- 21 Okamoto, M., Kuwahara, A., Seo, M., Kushiro, T., Asami, T., Hirai, N., Kamiya, Y., Koshiba, T.,  
22 Nambara, E., 2006. CYP707A1 and CYP707A2, which encode abscisic acid 8'-hydroxylases, are  
23 indispensable for proper control of seed dormancy and germination in Arabidopsis. *Plant*  
24 *Physiol.* 141, 97–107. doi:10.1104/pp.106.079475
- 25 Piskurewicz, U., Jikumaru, Y., Kinoshita, N., Nambara, E., Kamiya, Y., Lopez-Molina, L., 2008. The  
26 gibberellic acid signaling repressor RGL2 inhibits Arabidopsis seed germination by stimulating  
27 abscisic acid synthesis and ABI5 activity. *Plant Cell* 20, 2729–2745. doi:10.1105/tpc.108.061515
- 28 Plackett, A.R.G., Powers, S.J., Phillips, A.L., Wilson, Z.A., Hedden, P., Thomas, S.G., 2018. The early  
29 inflorescence of Arabidopsis thaliana demonstrates positional effects in floral organ growth and  
30 meristem patterning. *Plant Reprod.* 31, 171–191. doi:10.1007/s00497-017-0320-3
- 31 Shen, X., Pettersson, M., Rönnegård, L., Carlborg, Ö., 2012. Inheritance beyond plain heritability:  
32 variance-controlling genes in Arabidopsis thaliana. *PLoS Genet.* 8, e1002839.  
33 doi:10.1371/journal.pgen.1002839
- 34 Shu, K., Chen, Q., Wu, Y., Liu, R., Zhang, H., Wang, P., Li, Y., Wang, S., Tang, S., Liu, C., Yang, W., Cao,  
35 X., Serino, G., Xie, Q., 2016. ABI4 mediates antagonistic effects of abscisic acid and gibberellins  
36 at transcript and protein levels. *Plant J.* 85, 348–361. doi:10.1111/tpj.13109
- 37 Shu, K., Zhang, H., Wang, S., Chen, M., Wu, Y., Tang, S., Liu, C., Feng, Y., Cao, X., Xie, Q., 2013. ABI4  
38 regulates primary seed dormancy by regulating the biogenesis of abscisic acid and gibberellins  
39 in Arabidopsis. *PLoS Genet.* 9, e1003577. doi:10.1371/journal.pgen.1003577
- 40 Silva-Correia, J., Freitas, S., Tavares, R.M., Lino-Neto, T., Azevedo, H., 2014. Phenotypic analysis of  
41 the Arabidopsis heat stress response during germination and early seedling development. *Plant*  
42 *Methods* 10, 7. doi:10.1186/1746-4811-10-7
- 43 Simons, A.M., 2009. Fluctuating natural selection accounts for the evolution of diversification bet  
44 hedging. *Proc. Biol. Sci.* 276, 1987–1992. doi:10.1098/rspb.2008.1920
- 45 Simons, A.M., 2011. Modes of response to environmental change and the elusive empirical evidence

- 1 for bet hedging. *Proc. Biol. Sci.* 278, 1601–1609. doi:10.1098/rspb.2011.0176
- 2 Simons, A.M., Johnston, M.O., 2006. Environmental and genetic sources of diversification in the  
3 timing of seed germination: implications for the evolution of bet hedging. *Evolution* 60, 2280–  
4 2292. doi:10.1111/j.0014-3820.2006.tb01865.x
- 5 Song, J., Angel, A., Howard, M., Dean, C., 2012. Vernalization - a cold-induced epigenetic switch. *J.*  
6 *Cell Sci.* 125, 3723–3731. doi:10.1242/jcs.084764
- 7 Springthorpe, V., Penfield, S., 2015. Flowering time and seed dormancy control use external  
8 coincidence to generate life history strategy. *elife* 4. doi:10.7554/eLife.05557
- 9 Strogatz, S.H., 2015. *Nonlinear Dynamics and Chaos : with Applications to Physics, Biology,*  
10 *Chemistry, and Engineering.* . Westview Press, a member of the Perseus Books Group, Boulder,  
11 CO.
- 12 Takagi, H., Abe, A., Yoshida, K., Kosugi, S., Natsume, S., Mitsuoka, C., Uemura, A., Utsushi, H., Tamiru,  
13 M., Takuno, S., Innan, H., Cano, L.M., Kamoun, S., Terauchi, R., 2013. QTL-seq: rapid mapping of  
14 quantitative trait loci in rice by whole genome resequencing of DNA from two bulked  
15 populations. *Plant J.* 74, 174–183. doi:10.1111/tpj.12105
- 16 Topham, A.T., Taylor, R.E., Yan, D., Nambara, E., Johnston, I.G., Bassel, G.W., 2017. Temperature  
17 variability is integrated by a spatially embedded decision-making center to break dormancy in  
18 *Arabidopsis* seeds. *Proc Natl Acad Sci USA* 114, 6629–6634. doi:10.1073/pnas.1704745114
- 19 Tyler, L., Thomas, S.G., Hu, J., Dill, A., Alonso, J.M., Ecker, J.R., Sun, T.-P., 2004. DELLA proteins and  
20 gibberellin-regulated seed germination and floral development in *Arabidopsis*. *Plant Physiol.*  
21 135, 1008–1019. doi:10.1104/pp.104.039578
- 22 Unable to find information for 8266213, n.d.
- 23 van Der Schaar, W., Alonso-Blanco, C., Léon-Kloosterziel, K.M., Jansen, R.C., van Ooijen, J.W.,  
24 Koornneef, M., 1997. QTL analysis of seed dormancy in *Arabidopsis* using recombinant inbred  
25 lines and MQM mapping. *Heredity* 79 ( Pt 2), 190–200. doi:10.1038/hdy.1997.142
- 26 Venable, D.L., 2007. Bet hedging in a guild of desert annuals. *Ecology* 88, 1086–1090.  
27 doi:10.1890/06-1495
- 28 Verd, B., Crombach, A., Jaeger, J., 2014. Classification of transient behaviours in a time-dependent  
29 toggle switch model. *BMC Syst. Biol.* 8, 43. doi:10.1186/1752-0509-8-43
- 30 Vidigal, D.S., Marques, A.C.S.S., Willems, L.A.J., Buijs, G., Méndez-Vigo, B., Hilhorst, H.W.M.,  
31 Bentsink, L., Picó, F.X., Alonso-Blanco, C., 2016. Altitudinal and climatic associations of seed  
32 dormancy and flowering traits evidence adaptation of annual life cycle timing in *Arabidopsis*  
33 *thaliana*. *Plant Cell Environ.* 39, 1737–1748. doi:10.1111/pce.12734
- 34 Viney, M., Reece, S.E., 2013. Adaptive noise. *Proc. Biol. Sci.* 280, 20131104.  
35 doi:10.1098/rspb.2013.1104
- 36 Yamaguchi, S., Kamiya, Y., 2000. Gibberellin biosynthesis: its regulation by endogenous and  
37 environmental signals. *Plant Cell Physiol.* 41, 251–257.
- 38 Zentella, R., Zhang, Z.-L., Park, M., Thomas, S.G., Endo, A., Murase, K., Fleet, C.M., Jikumaru, Y.,  
39 Nambara, E., Kamiya, Y., Sun, T.-P., 2007. Global analysis of DELLA direct targets in early  
40 gibberellin signaling in *Arabidopsis*. *Plant Cell* 19, 3037–3057. doi:10.1105/tpc.107.054999
